# Supplementary material
Source: PubMed Central journal article supplement (PMC4362521)
Supplement: NIHMS643218-supplement-Supplementary_Note.pdf [file NIHMS643218-supplement-Supplementary_Note.pdf]

**Supplementary Note for:**

**Alopecia areata is driven by cytotoxic T lymphocytes and is reversed by JAK inhibition**

Luzhou Xing<sup>1\*</sup>, Zhenpeng Dai<sup>2\*</sup>, Ali Jabbari<sup>2\*</sup>,  
Jane E. Cerise<sup>2,3</sup>, Claire A. Higgins<sup>2</sup>, Weijuan Gong<sup>2</sup>, Annemieke de Jong<sup>2</sup>, Sivan Harel<sup>2</sup>, Gina M. DeStefano<sup>2,4</sup>, Lisa Rothman<sup>2</sup>, Pallavi Singh<sup>2</sup>, Lynn Petukhova<sup>2</sup>, Julian Mackay-Wiggan<sup>2</sup>, Angela M. Christiano<sup>2,5\*</sup> and Raphael Clynes<sup>1,2,6\*</sup>

<sup>1</sup>Departments of Pathology <sup>2</sup>Dermatology, <sup>3</sup>Psychiatry, <sup>4</sup>Epidemiology, <sup>5</sup>Genetics & Development and <sup>6</sup>Medicine, Columbia University, New York, NY.

\*These authors contributed equally to this study.

## **METHODS**

### **Mice**

C3H/HeJ mouse strain (Jackson Laboratories, Bar Harbor, ME) was used for all animal studies. Only female mice were used. Mouse recipients of alopecic skin grafts were aged 7-10 weeks at the time of grafting. For prevention experiments, drug administration began the day after grafting. For systemic treatment studies, drug administration was initiated approximately 3 months after mice lost their hair. For topical treatment studies, drug administration was initiated 20 weeks following grafting. All animal procedures were done according to protocols approved by the Columbia University Medical Center Institutional Animal Care and Use Committee.

### **Human studies**

All human studies have been approved by the Columbia University Medical Center Institutional Review Board and were conducted under the Declaration of Helsinki principles. Informed written consent was received from participants before inclusion in the study.

### **Clinical Evaluation of Oral Ruxolitinib in Alopecia Areata**

We initiated a single center, proof-of-concept clinical trial in the Clinical Trials Unit in the Department of Dermatology at the Columbia University Medical Center entitled “An Open-Label Pilot Study to Evaluate the Efficacy of RUXOLITINIB in Moderate to Severe Alopecia Areata” (clinicaltrials.gov identifier: NCT01950780).

The primary efficacy endpoint of this initial pilot study is the proportion of responders achieving 50% or greater regrowth at the end of treatment compared to baseline. Secondary endpoints include the changes in hair growth both during and after treatment measured as a continuous variable; patient global assessments; quality of life assessments; and durability of response following treatment cessation.

Inclusion criteria included 30 to 95% hair loss due to alopecia areata (AA) as measured by SALT score<sup>30</sup>; hair loss duration of at least 3 months; stable hair loss without active evidence of regrowth; subject age 18-75 years.

Exclusion criteria included active scalp disease other than AA; medical history that might increase the risks related to ruxolitinib e.g. hematologic, infectious, immune related diseases or malignancies; current treatment with any modality that might affect AA response; medications known to interact with ruxolitinib; pregnancy; etc.

Subjects on study are treated with oral ruxolitinib 20mg BID for at least 3 months. The patients in this manuscript have achieved over 90% regrowth. Skin punch biopsies (4mm) were obtained at baseline and after 12 weeks of treatment.

### **Antibodies used for mice treatment, flow cytometry, immunostaining and western blot analysis**

All antibodies used in these studies are listed in table form below.

Flow cytometric analysis used the following anti-mouse antibodies: CD3 (17A2, Ebioscience), CD4 (GK1.5, BD), CD8 $\alpha$  (53-6.7, BD), CD8 $\beta$  (YTS156.7.7, Biolegend), NKG2D (CX5, Ebioscience), NKG2A/C/E (clone 20d5, Ebioscience), CD44 (IM7, BD), CD45 (30-F11, BD), CD49b (Dx5, BD), CD62L (MEL-14, BD), CD69 (H1.2F3, BD),

CD103 (2E7, eBioscience), IFN $\gamma$  (XMG1.2, Ebioscience), Granzyme B (NGZB, eBioscience), Rae-1 (186107, R&D).

For immunohistochemical studies of mouse skin, 8  $\mu$ M methanol-fixed frozen skin sections were stained with primary rat antibodies (Biolegend) including: anti-CD8 (clone 53-6.7), Biotin anti-MHC class I (clone 36-7.5), anti-MHC class II (clone M5/114.15.2). Biotinylated goat anti-rat IgG (Life Technologies) was used as secondary antibody. For immunofluorescence studies anti-H60 (R&D, clone 205326), anti-Pan Rae-1(R&D, clone 186107), anti-NKG2D (R&D clone 191004), anti-IL-15 (SCBT, H-114), anti-IL-15 RA (SCBT, N-19), anti-K71 (Abcam), primary antibody were used in immunofluorescence. Alexa Fluor 488 or Alexa Fluor 594-conjugated goat anti-Rat, donkey anti-Rabbit or donkey anti-Goat antibody was used as secondary antibody (Life Technologies).

For immunohistochemical studies of human skin, 5 $\mu$ M formalin fixed and paraffin skin section were used. After heat antigen retrieval, skin sections were stained with primary anti-human antibodies including: anti-CD8(Abcam ab4055), anti-CD4(Leica clone 1-F6), HLA Class 1 ABC(Abcam clone EMR8-5), HLA-DR/DP/DQ(SCBT clone CR3/43). ImmPRESS HRP Anti-Rabbit Ig or Mouse Ig (Peroxidase) Polymer (Vector Lab) were used as secondary antibody.

Human hair follicles were microdissected and embedded in OCT compound prior to sectioning and staining. 8  $\mu$ M methanol-fixed frozen sections were stained with anti-IL-15 (SCBT, H-114) and anti-IL-15 RA (SCBT, N-19) or anti-IL-15 RB (SCBT, C-20) and CD8 (SCBT, C8/144B) followed by staining with Alexa Fluor 488 or Alexa Fluor



594-conjugated secondary antibody (Life Technologies). All images were captured with an SDRC Zeiss Exciter Confocal Microscope.

For western blotting, samples with treatment were resolved by 4-12% SDS-PAGE (Life Technologies) and then transferred to Westran PVDF membranes (GE Healthcare life Sciences). Blots were probed with the following Abs (All from Cell Signaling Technology): anti-phospho-STAT1 (Tyr701), anti-phospho-STAT5 (Tyr694), anti-STAT1 and anti-STAT5.

*Antibodies for in vivo treatment*

| <b>Mouse antibody</b> | <b>Company</b> | <b>Clone</b>  | <b>Cat No.</b> |
|-----------------------|----------------|---------------|----------------|
| Anti-IL15 R $\beta$   | Biolegend      | TM- $\beta$ 1 | 123204         |
| IL-2                  | BioXcel        | S4B6-1        | BE0043-1       |
| IL-2                  | BioXcel        | JES6-1A12     | BE0043         |
| IFN- $\gamma$         | BioXcel        | H22           | BE0254         |
| IL-21                 | Ebioscience    | FFA21         | 16-7211-85     |

*Antibodies for flow cytometry (1/100 dilution)*

| <b>Mouse antibody</b> | <b>Company</b> | <b>Clone</b> | <b>Cat No.</b> |
|-----------------------|----------------|--------------|----------------|
| CD3                   | Ebioscience    | 17A2         | 17-0032        |
| CD4                   | BD             | GK1.5        | 560181         |
| CD8a                  | BD             | 53-6.7       | 560469         |
| CD8b                  | Biolegend      | YTS156.7.7   | 126610         |
| NKG2D                 | Ebioscience    | CX5          | 12-5882        |
| NKG2A/C/E             | Ebioscience    | 20d5         | 13-5896        |
| CD44                  | BD             | IM7          | 553133         |
| CD45                  | BD             | 30-F11       | 552848         |
| D49b                  | BD             | Dx5          | 553857         |
| Cd62L                 | BD             | MEL-14       | 553152         |
| CD69                  | BD             | H1.2F3       | 557392         |
| CD103                 | Ebioscience    | 2E7          | 17-1031        |
| IFN $\gamma$          | Ebioscience    | XMG1.2       | 11-7311        |

|            |             |        |          |
|------------|-------------|--------|----------|
| Pan Rae-1  | R&D systems | 186107 | MAB17582 |
| Granzyme B | Ebioscience | NGZB   | 11-8898  |

Antibodies for immunostaining and western blot (1/100 dilution unless otherwise noted)

| Human antibody  | Company | Clone   | Cat No.      |
|-----------------|---------|---------|--------------|
| CD3             | Abcam   | PS1     | Ab699        |
| CD8             | SCBT    | C8/144B | Sc-53212     |
| CD4             | Leica   | 1-F6    | CD4-1F6-L-CE |
| HLA Class I ABC | Abcam   | EMR8-5  | ab70328      |
| HLA-DR/DP/DQ    | SCBT    | CR3/43  | sc-53302     |

| Mouse antibody | Company     | Clone       | Cat No.  |
|----------------|-------------|-------------|----------|
| CD8            | Biologend   | 53-6.7      | 100702   |
| MHC-class I    | Biologend   | 36-7.5      | 114903   |
| MHC-class II   | Biologend   | M5/114.15.2 | 107602   |
| H60            | R&D systems | 205326      | MAB1155  |
| Pan Rae-1      | R&D systems | 186107      | MAB17582 |
| NKG2D          | R&D systems | 191004      | MAB1547  |

| Mouse/Human antibody   | Company        | Clone            | Cat No.  | IF/IHC Dilution |
|------------------------|----------------|------------------|----------|-----------------|
| IL-15                  | SCBT           | polyclonal H-114 | sc-7889  |                 |
| IL-15RA                | SCBT           | polyclonal N-19  | sc-1524  |                 |
| Phospho-Stat1 (Tyr701) | Cell signaling | D4A7             | 7649     |                 |
| Phospho-Stat3 (Tyr705) | Cell signaling | D3A7             | 9145     | 1/200           |
| Phospho-Stat5 (Tyr694) | Cell signaling | C11C5            | 9359     | 1/400           |
| Stat1                  | Cell signaling | polyclonal       | 9172     |                 |
| Stat5                  | Cell signaling | polyclonal       | 9363     |                 |
| K71                    | Abcam          | polyclonal       | Ab133817 |                 |

STAT1, STAT5, pSTAT1 and pSTAT5 ab's were diluted 1/1000 for western blots.

### IL-15 and IL-15RA staining blocking reagents

| Blocking reagent          | Company  | Cat No.   |
|---------------------------|----------|-----------|
| IL-15                     | Peprtech | AF-200-15 |
| IL-15 RA blocking peptide | SCBT     | sc-1524 P |

## **RNA-Seq analysis**

Samples were sequenced on the HiSeq 2000 sequencer (Illumina, San Diego, CA) for 50 cycles. RNA-Seq files were demultiplexed by the Rockefeller University Genomics Core Facility. Quality control of the sample fastq files was performed using fastqc<sup>31</sup>. TopHat<sup>32</sup> was used to map transcripts to the UCSC mm9 reference genome from iGenome. The RefSeq gene annotation packaged with this iGenome version of the UCSC mm9 were used. The htseq-count utility from the HTSeq package was used to convert TopHat bam files to counts that could be used as input for downstream analysis of differential expression with edgeR<sup>33</sup>. Absent genes were removed and a pseudocount of 1 was added in order to avoid division by zero in downstream analysis. EdgeR was used to identify differentially expressed genes using a matched pairs design with three biological replicates.

## **Microarray Analysis**

### *Quality Control, Preprocessing*

For the mouse cDNA samples were hybridized to the Mouse Genome 430 2.0 gene chips and subsequently washed, stained with streptavidin-phycoerythrin, and scanned on an HP GeneArray Scanner (Hewlett-Packard Company, Palo Alto, CA). For the human, amplified cDNA was hybridized to the Human Genome U133 Plus 2.0 gene chips.

Microarray quality control and preprocessing were performed using BioConductor in R. Preprocessing of the three experiments, 1) spontaneous AA mice vs. normal

mice, 2) prevention mice with three treatments vs. placebo and sham-operated mice, and 3) treatment mice for two treatments vs. placebo were performed separately using the same pipeline.

Quality control was performed using the `affyanalysisQC` package from <http://arrayanalysis.org/>. `AffyanalysisQC` uses the R/BioConductor packages: `affy`, `affycomp`, `affypdnn`, `affyPLM`, `affyQCReport`, `ArrayTools`, `bioDistm`, `biomaRt`, `simpleaffy`, and `yaqcaffy` to perform QC within a single script. RMA normalization<sup>34</sup> was performed on each experimental group separately. Batch effect correction using `ComBat` was required for the prevention experiments. Batches, treatments and time points were modeled treating each treatment group effect as constant over time, and grouping the PBS controls in groups reflecting both treatment and time.

In addition to the preprocessing that was done for the mouse skin samples, `Harshlight` was used to correct for image defects for the human skin samples.

## **Data Deposition**

Microarray and RNA-seq data was deposited in Gene Expression Omnibus, accession numbers GSE45657, GSE45512, GSE45513, GSE45514, GSE45551, and GSE58573.

## **Identification of Gene Signatures**

*Differential expression analysis*

Initial analysis of differential gene expression was performed on the spontaneous mouse 3x3 and the human 5x5 data sets using limma<sup>35</sup>. A threshold of 1.5 fold change and unadjusted p-value of 0.05.

### *Unsupervised analysis*

Hierarchical clustering was performed using Cluster<sup>36</sup> on the 363 genes from the human 5x5 and 583 genes from the spontaneous mouse 3x3 that met the threshold  $\text{abs}(\log\text{FC}) > 1$ , unadjusted p-value  $\leq 0.05$ . Genes were median centered and normalized. Spearman rank correlation was used as the similarity measure and average linkage was used to perform row (genes) and column (sample) clustering. Visualization of the hierarchical clusters was performed with java TreeView<sup>37</sup>. Gene Expression Dynamic Index (GEDI) analysis was used to visualize how “metagenes” identified with a self organizing map algorithm vary across samples<sup>38</sup>. Metagenes are clusters of genes that show similar expression patterns across samples and that are assigned to a single pixel in a two dimensional grid. Neighboring pixels demonstrate similar expression patterns to one another.

### *RT-PCR Validation*

Predicted differentially expressed genes in human and mouse were confirmed using RT-PCR. First-strand cDNA was synthesized using a ratio of 2:1 random primers: Oligo (dT) primer and SuperScript III RT (Invitrogen) according to the manufacturer's instructions. qRT-PCR was performed on an ABI 7300 machine and analyzed with ABI Relative Quantification Study software (Applied Biosystems, Foster City, CA, USA). Primers were designed according to ABI guidelines and all reactions were performed

using *Power* SYBR Green PCR Master Mix (Applied Biosystems), 250 nM primers (Invitrogen) and 20 ng cDNA in a 20 $\mu$ L reaction volume. Primer sequences are provided in Supplementary Tables 4 and 5. The following PCR protocol was used: step 1: 50°C for 2 min; step 2: 95°C for 10 min; step 3: 95°C for 15 s; step 4: 60°C for 1 min; repeat steps 3 and 4 for 40 cycles. All samples were run in quadruplicate for three independent runs and normalized against an endogenous internal control as indicated.

### *ALADIN scores*

The IFN and CTL signatures were used to develop a bivariate score statistic. Individual signature IFN and CTL scores were determined following procedures used in human SLE<sup>39,40</sup>. The sets of genes selected to comprise our IFN and CTL signatures were CD8A, GZMB, and ICOS for the CTL signature, and CXCL9, CXCL10, CXCL11, STAT1, and MX1 for the IFN signature. The scores for the prevention mice were calculated in relation to the sham mice; whereas, the scores for the topical treatment experiments were calculated relative to all the samples at week zero. Based on our human studies (unpublished), ALADIN was further extended to include a hair keratin (KER) signature. The set of genes selected to comprise the KER signature are DSG4, HOXC31, KRT31, KRT32, KRT33B, KRT82, PKP1, and PKP2. The ALADIN scores for the baseline and 12 week skin biopsies obtained from subjects enrolled in the oral Ruxolitinib clinical trial were calculated relative to the healthy controls at baseline.

### **Power analysis**

For the analysis of response to treatment, we performed a two-sample comparison of proportions power calculation for group sample sizes of five each for

treated and placebo mice for the case when the true proportion in population 1 (the treatment group) expected to respond to treatment is 0.95 and the true proportion in population 2 (the placebo group) expected to respond is 0.20. At a significance level of  $\alpha = 0.05$ , using Barnard's exact test we calculated a power of 0.803 for a one-sided test to detect a difference of proportions when the proportions for the two populations are 0.95 and 0.20 with group sample sizes equal to five each. In some cases in which fewer than 5 animals per group were present per experiment, multiple experiments were collapsed in order to ensure statistical power.

### **Statistical Analysis of Treatment Effects**

Mice were expected to exhibit alopecia 4-12 weeks after grafting of alopecic skin. Experiments in which control mice failed to demonstrate hair loss by 8 weeks were aborted. For the prevention experiments, a time-to-event survival analysis for interval censored data was performed. The survival and interval packages in R were used to perform log-rank tests. Hair growth index was calculated as described<sup>11</sup>.

For the treatment experiments (Figure 4b), the R package nparLD was used to test the hypothesis that there exists a treatment by time interaction. Analyses were performed using the hair growth index from three replicate experiments containing three mice from each treatment and placebo group for a total of nine mice from each group. A F1-LD-F1 design was employed. For the JAK1/2i treatment vs. placebo, the hypothesis of no interaction, i.e., parallel time profiles, is rejected at the 5% level using both the Wald-Type Statistic and the ANOVA-Type Statistic with the p-values of 4.40e-21 and 3.35e-18, respectively. For the JAK3i Treatment vs Placebo, the hypothesis of no interaction, i.e., parallel time profiles, is rejected at the 5% level using both the Wald-

Type Statistic and the ANOVA-Type Statistic with the p-values of 1.45e-30 and 2.42e-21, respectively.

All mice were included in survival (time-to-event) analysis statistics. For lymph node and skin cell analysis, biopsy was harvested at the indicated time points following treatment in parallel with control mice. In the IFN- $\gamma$ - and IL-2- neutralization experiments one out of five control mice that did not exhibit hair loss was not included in the photographs (Figures 2b, 2e). These mice were not sacrificed in order to continue to monitor for hair loss, but for statistical purposes for skin cell analysis (Figure 2b, 2e), these unanalyzed samples were assigned a cell count value of 0% CD8<sup>+</sup>NKG2D<sup>+</sup> cells to allow for a rigorous and conservative statistical comparison with treated mice.

No randomization was used and the investigators were not blinded to the group allocation during the experiments or when assessing the outcomes.

Unpaired parametric two-sided t-tests were used to test for differences in means and frequencies between treated and untreated groups. For statistical purposes, we assume all variances to be the same for each group.

Interval censored log-rank tests were used to perform all time to event survival analysis. This test properly accounts for data where the exact event time is not known but the event is known to fall within some interval.

Nonparametric longitudinal data analysis was used to test for response x time interactions. These methods are particularly suited for small sample size.



## Sample sizes, number of replicates, and statistical tests among experiments

| Figure | n_control | n_exp   | experiment                                   | statistic | p-value                             |
|--------|-----------|---------|----------------------------------------------|-----------|-------------------------------------|
| 1c     | 3+3+3+3   | 6+6+6+6 | C3HAA/C3H cell counts                        | t         | < 0.0001                            |
| 1d     | 2+2+2     | 5+5+4   | C3HAA/C3H skin                               | t         | < 0.0001                            |
| 1d     | 3+3+2     | 4+4+4   | C3HAA/C3H lymph node                         | t         | < 0.0001                            |
| 1f     | 3         | 3       | primary cell culture                         | N/A       | NA                                  |
| 2b     | 5         | 5       | $\alpha$ -IFN $\gamma$ , mice with hair loss | log-rank  | 0.047                               |
| 2b     | 5         | 5       | $\alpha$ -IFN $\gamma$ Skin cell counts      | t         | 0.0228                              |
| 2e     | 5         | 5       | $\alpha$ -IL2, mice with hair loss           | log-rank  | 0.048                               |
| 2e     | 5         | 5       | $\alpha$ -IL2 Skin cell counts               | t         | 0.0091                              |
| 2h     | 5+4+3     | 5+4+3   | $\alpha$ -IL15Rb, mice with hair loss        | log-rank  | 1.11E-05                            |
| 2h     | 2+2+1     | 2+2+2   | $\alpha$ -IL15Rb Skin cell counts            | t         | < 0.0001                            |
| 3b     | 4+6       | 4+6     | JAK1/2i, mice with hair loss                 | log-rank  | 0.00041                             |
| 3c     | 2+3       | 3+3     | JAK1/2i Skin cell counts                     | t         | 0.0003                              |
| 3c     | 2+3       | 4+5     | JAK1/2i lymph node cell counts               | t         | < 0.0001                            |
| 3g     | 7         | 5       | JAK3i, mice with hair loss                   | log-rank  | 0.0025                              |
| 3h     | 2+2       | 2+3     | JAK3i Skin cell counts                       | t         | 0.0002                              |
| 3h     | 2+2       | 2+3     | JAK3i lymph node cell counts                 | t         | 0.0049                              |
| 4b     | 3+3+3     | 3+3+3   | JAK1/2i / JAK3i / Vehicle                    | nonparLD  | Jak1/2i 4.4e-21,<br>Jak3i 1.5e-30   |
| 4c     | 3         | 3       | JAK1/2i / JAK3i / Vehicle Skin               | t         | Jak1/2i 0.017,<br>Jak3 0.015        |
| 4c     | 3         | 3       | JAK1/2i / JAK3i / Vehicle lymph node         | t         | Jak1/2i p=0.0297,<br>Jak3i p=0.0908 |

For *in vivo* studies data are provided as cumulative data. The number of replicates are provided as shown above; For example “3+3+3+3” refers to four separate experiments each including three experimental mice. For *in vitro* studies (Figures 1f, 3d, and 3e), experiments were performed in triplicate.

## Supplementary Figures

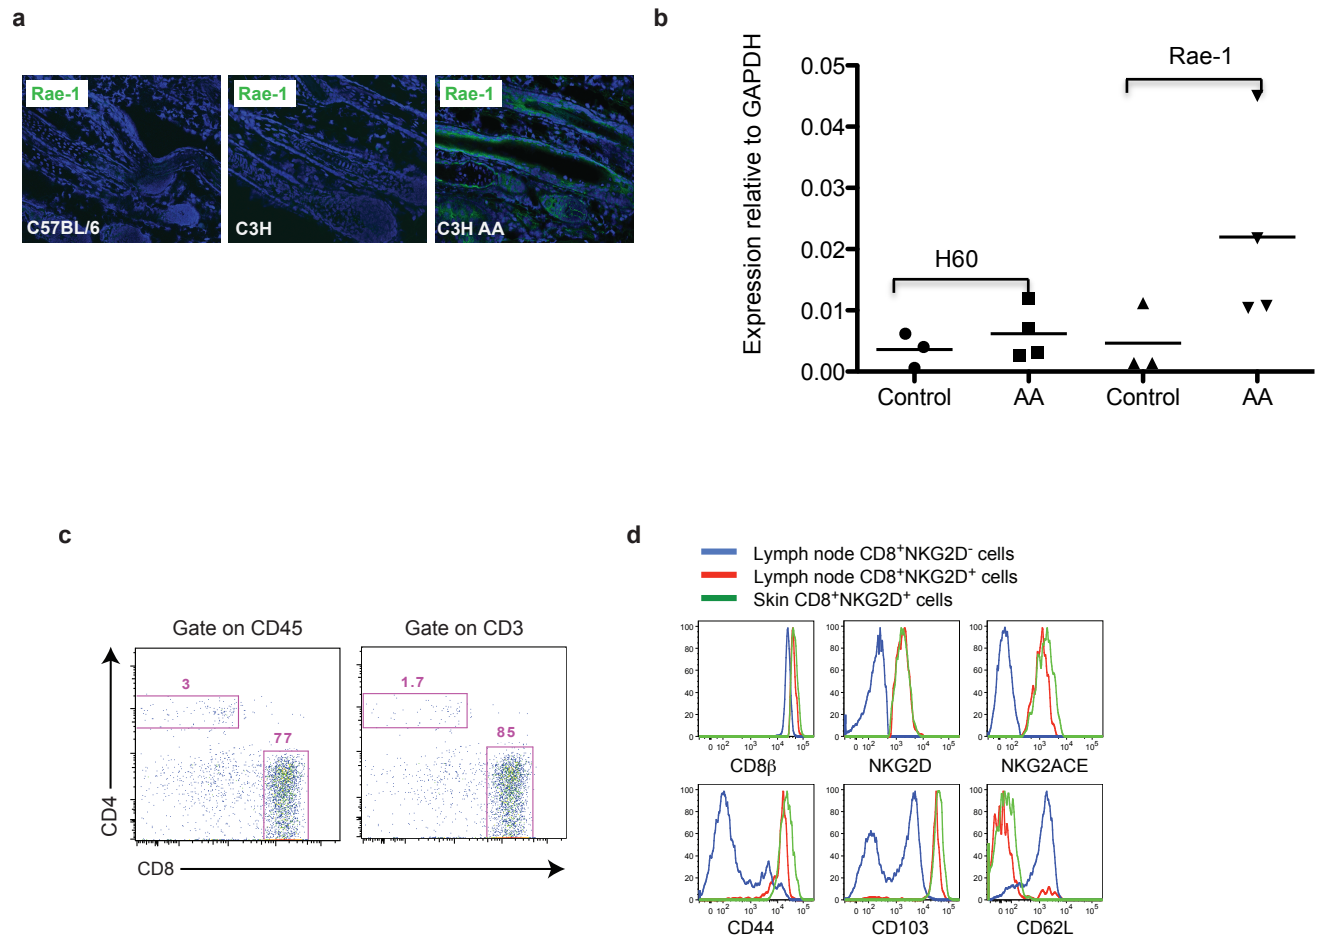

### Supplementary Figure 1. NKG2D-NKG2DL expression in mouse AA

**a**, Rae-1 is upregulated in the AA HF. Immunostaining of lesional using a pan-Rae-1 antibody in C3H/HeJ alopecic mice, unaffected C3H/HeJ mice and C57Bl.6 mice. **b**, H60 and Rae-1 are overexpressed in AA. NKG2DL expression in alopecic lesional skin from C3H/HeJ mice compared with non-lesional skin from unaffected C3H/HeJ mice. RT-PCR data from cDNA from 3 mice are shown and represented as relative to GAPDH. **c**, CD4 T cells are infrequent in AA lesional skin: Flow cytometric evaluation of lesional alopecic skin. Quantitation of CD4 and CD8 T cells as a percentage of total gated CD3<sup>+</sup> or CD45<sup>+</sup> cells. **d**, Effector memory immunophenotype of CD8<sup>+</sup>NKG2D<sup>+</sup> T cells are similar in lesional skin and in the cutaneous draining lymph node. Gated CD8α<sup>+</sup>NKG2D<sup>+</sup> T cells are displayed for CD8β, NKG2D, NKG2A/C/E, CD44, CD103 and CD62L expression.

| Venn Diagram Group                                                                                           | Gene overlap                                                                                                                                                                                                                                                                                       |
|--------------------------------------------------------------------------------------------------------------|----------------------------------------------------------------------------------------------------------------------------------------------------------------------------------------------------------------------------------------------------------------------------------------------------|
| Group I (NKG2D <sup>+</sup> CD8 <sup>+</sup> T cell and NK cell (Bezman))                                    | Arsb, Gem, Itga2, Klf12, Klrd1, Spry2, Styk1, Sytl3, 483142619Rik, A930038C07Rik                                                                                                                                                                                                                   |
| Group II (CD8 <sup>+</sup> NKG2D <sup>+</sup> T cell and CD8 <sup>+</sup> cell (Best))                       | Anxa1, Atp2b4, Bhlhe40, Casp1, Ccl3, Ccl4, Ccr2, Crybg3, Ctla2a, Cx3cr1, Cyfip1, Dennd5a, Dkk1, Dock5, Ern1, F2rl2, Fam129a, Fasl, Fcgr2b, Gadd45b, Gna15, Gzmk, Id2, Ifng, Irf4, Itga1, Itgax, Kcnk5 Klrc1, L1cam, Lgals1, Ncald, Pptrj, Rnf216, Rora, S100a4, S100a6 Soat2, Ttc39c, Zdhhc2, Zeb2 |
| Group III (CD8 <sup>+</sup> NKG2D <sup>+</sup> T cell and CD8 <sup>+</sup> cell (Best) and NK cell (Bezman)) | Car5b, Ccl5, Fbxl2, Gm11435, Gzma, Gzmb, Il12rb2, Klrc2, Klrc3, Klre1, Klrk1, Osbp13, S1pr5, Slc25a24                                                                                                                                                                                              |

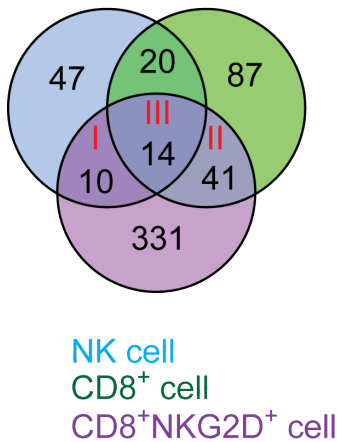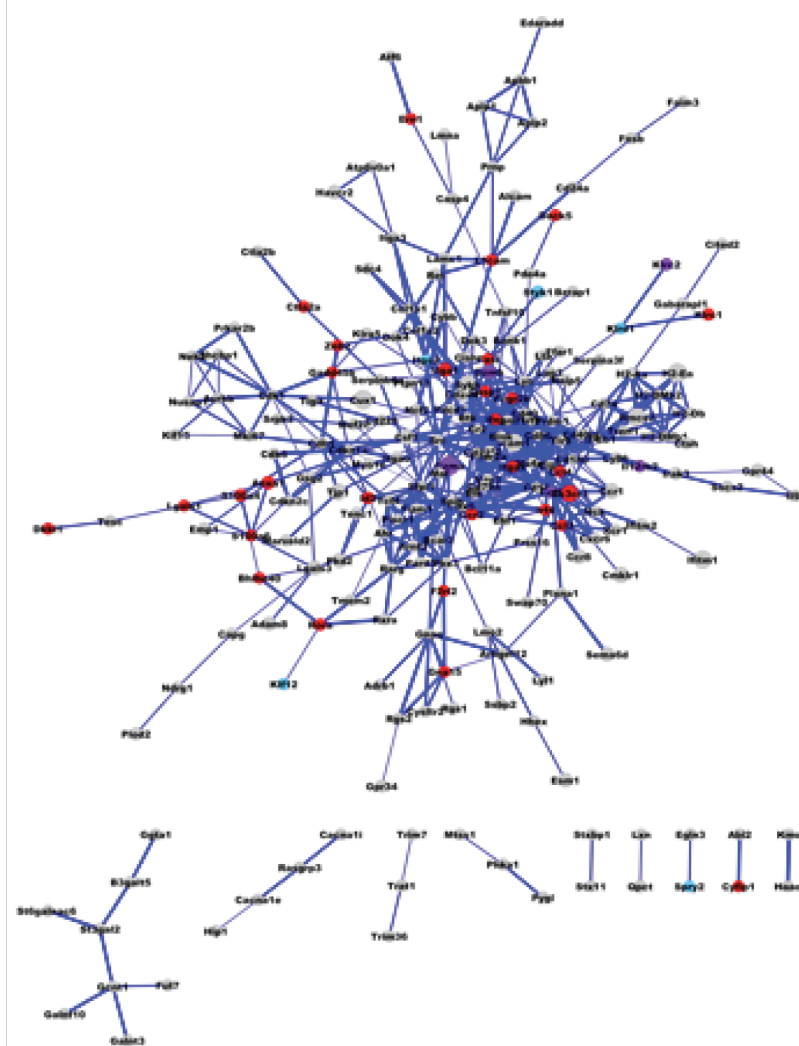

**Supplementary Figure 2. Transcriptional profile of CD8<sup>+</sup>NKG2D<sup>+</sup> cells in mouse AA.**

Top and bottom left panels, List of genes and Venn diagram showing overlap of our CTL gene expression with those in the literature<sup>41,42</sup> Bottom right panel, Network Map of differentially expressed upregulated genes in CD3<sup>+</sup> CD8<sup>+</sup>NKG2D<sup>+</sup> LN cells vs. CD8<sup>+</sup>NKG2D<sup>-</sup> cells. String.db was used to create a biological interaction score matrix with the differentially expressed genes. The network map was created using cytoscape; only biological interactions >0.75 were used. Nodes represent genes, and edges represent biological interactions as derived from string.db. Node size is proportional to fold change, and edge width is proportional to biological interaction.

| Signature  | Human                                                                                                                                                                                                                                                                                                    | Mouse                                                                                                                                                                                                                                                                                                            |
|------------|----------------------------------------------------------------------------------------------------------------------------------------------------------------------------------------------------------------------------------------------------------------------------------------------------------|------------------------------------------------------------------------------------------------------------------------------------------------------------------------------------------------------------------------------------------------------------------------------------------------------------------|
| CTL        | GZMA(3.65x), CD8A(3.04x), GZMB(2.75x), GZMK(2.68x), PRF1(2.30x), LCP2(2.29x), CD2(2.22x), IL7(2.20x), THEMIS(2.14x)                                                                                                                                                                                      | Gzma(56.37x), Cd8a(9.05x), Gzmb(21.74x), Gzmk(2.61x), Prf1(1.62x), Lcp2(2.32x), Cd2(3.32x), Il7(1.99x), Themis(1.84x)                                                                                                                                                                                            |
| IFN        | CXCL10(12.37x), CXCL9(9.53x), MMP12(4.04x), IFI44(3.03x), SPP1(2.69x), IRF8(2.64x), PTPRC(2.63x), CCL2(2.54x), RSAD2(2.49x), CCL5(2.36x), IFIT2(2.28x), C1S(2.28x), TLR3(2.25x), IFIT3(2.19x), OAS2(2.12x), GBP1(2.11x), XCL1(2.05x), CCR2(2.04x), CXCL11(1.86x), IFNG(1.57x), STAT1(1.53x), JAK1(0.85x) | Cxcl10(37.58x), Cxcl9(42.30x), Mmp12(10.18x), Ifi44(20.58x), Spp1(10.61x), Irf8(4.44x), Ptprc(2.11x), Ccl2(6.12x), Rsad2(3.20x), Ccl5(27.95x), Ifit2(2.39x), C1s(2.49x), Tlr3(2.34x), Ifit3(4.75x), Oas2(3.97x), Gbp1(17.81x), Xcl1(2.88x), Ccr2(4.66x), Cxcl11(53.33x), Ifng(4.71x), Stat1(14.48x), Jak1(1.40x) |
| $\gamma_c$ | IL15(2.24x), JAK3(2.10x), IL2RG(2.08x), IL2RB(1.98x), IL15RA(1.60x), IL21R(1.84x), IL2RA(1.12x), IL7(2.20x), IL7R(1.61x)                                                                                                                                                                                 | Il15(0.80x), Jak3(1.39x), Il2rg(2.94x), Il2rb(3.14x), Il15ra(1.40x), Il21r(1.69x), Il2ra(1.57x), Il7(1.99x), Il7r(2.39x)                                                                                                                                                                                         |
| Other      | ST8SIA4(2.94x), GPR65(2.60x), GLIPR1(2.29x), IKZF1(2.29x), CD274(2.17x), SAMD9L(2.16x), LCP1(2.15x), SASH3(2.09x), ATP8B4(2.07x)                                                                                                                                                                         | St8sia4(1.86x), Gpr65(3.25x), Glipr1(2.33x), Ikzf1(2.34x), Cd274(8.41x), Samd9l(4.37x), Lcp1(2.25x), Sash3(2.76x), Atp8b4(3.44x)                                                                                                                                                                                 |

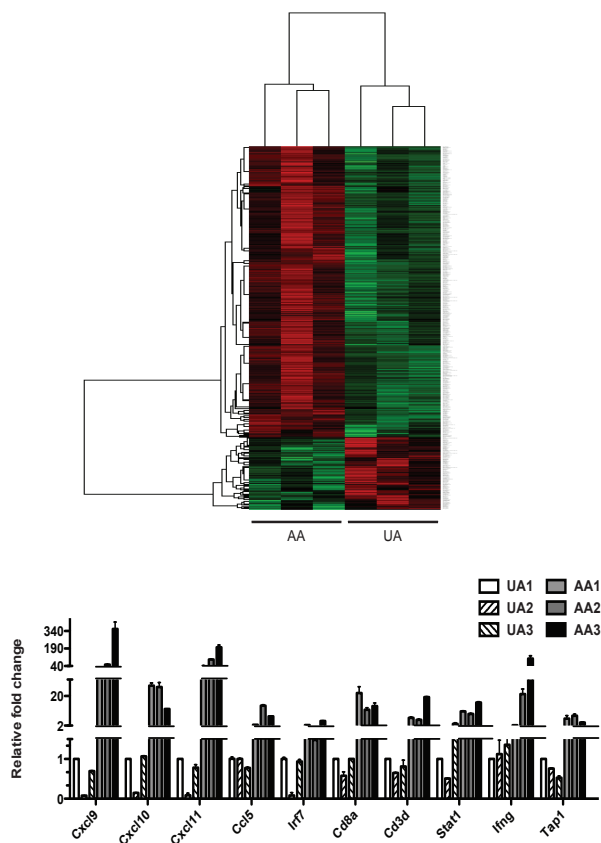

**Supplementary Figure 3. Validation of mouse RNA expression studies.**

To determine the expression signature of C3H/HeJ mouse skin affected with alopecia areata, lesional skin was isolated from three affected female mice and three unaffected aged-matched controls. Total and small RNAs were isolated from whole skin and biotin-labeled cRNA was generated through *in vitro* transcription, followed by hybridization to the Affymetrix Mouse 430

2.0 Genechip. Data analysis was done as outlined in the Methods. Top panel, Representative list of differentially expressed genes among human AA and C3H/HeJ AA reveals shared inflammatory pathways, in particular  $\text{IFN}\gamma$  pathway genes, genes representative of CD8 effectors, and a striking  $\gamma_c$  pathway signature. Middle panel, Heatmap depicting the significantly and differentially expressed genes between C3H/HeJ affected and unaffected skin. Bottom panel, Validation by qRT-PCR of several selected immune-related genes from this list whose expression levels are significantly upregulated in AA lesional skin compared to unaffected skin, where each bar represents the average fold change of three independent experiments. UA = unaffected; AA = affected

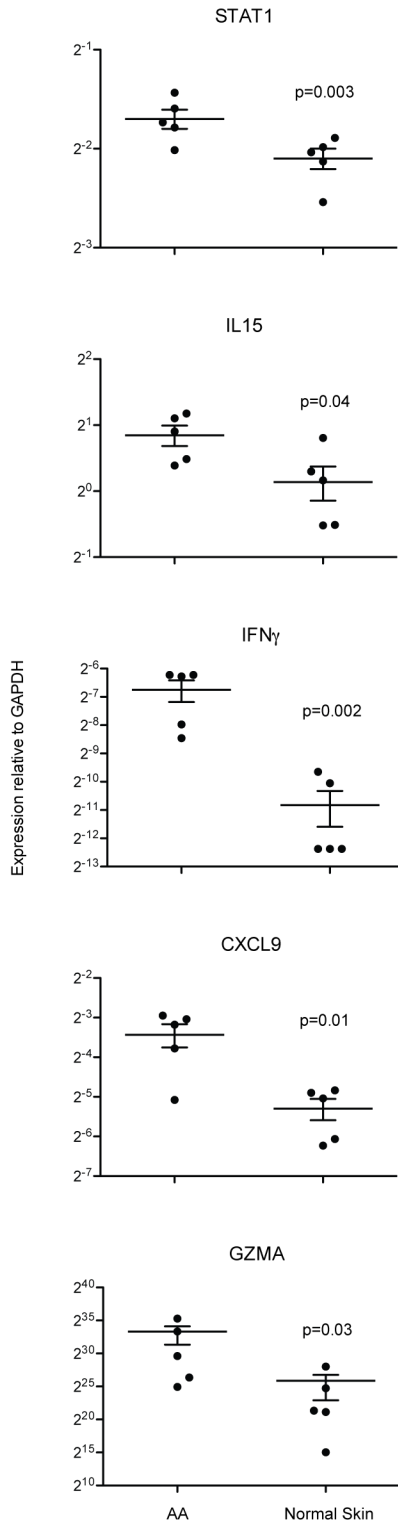

### Supplementary Figure 4. Validation of human mRNA expression studies.

Validation by qRT-PCR of several selected immune-related genes whose expression levels were significantly upregulated by transcriptional profiling in human AA lesional skin (n=5) compared to unaffected skin from healthy controls (n=5).

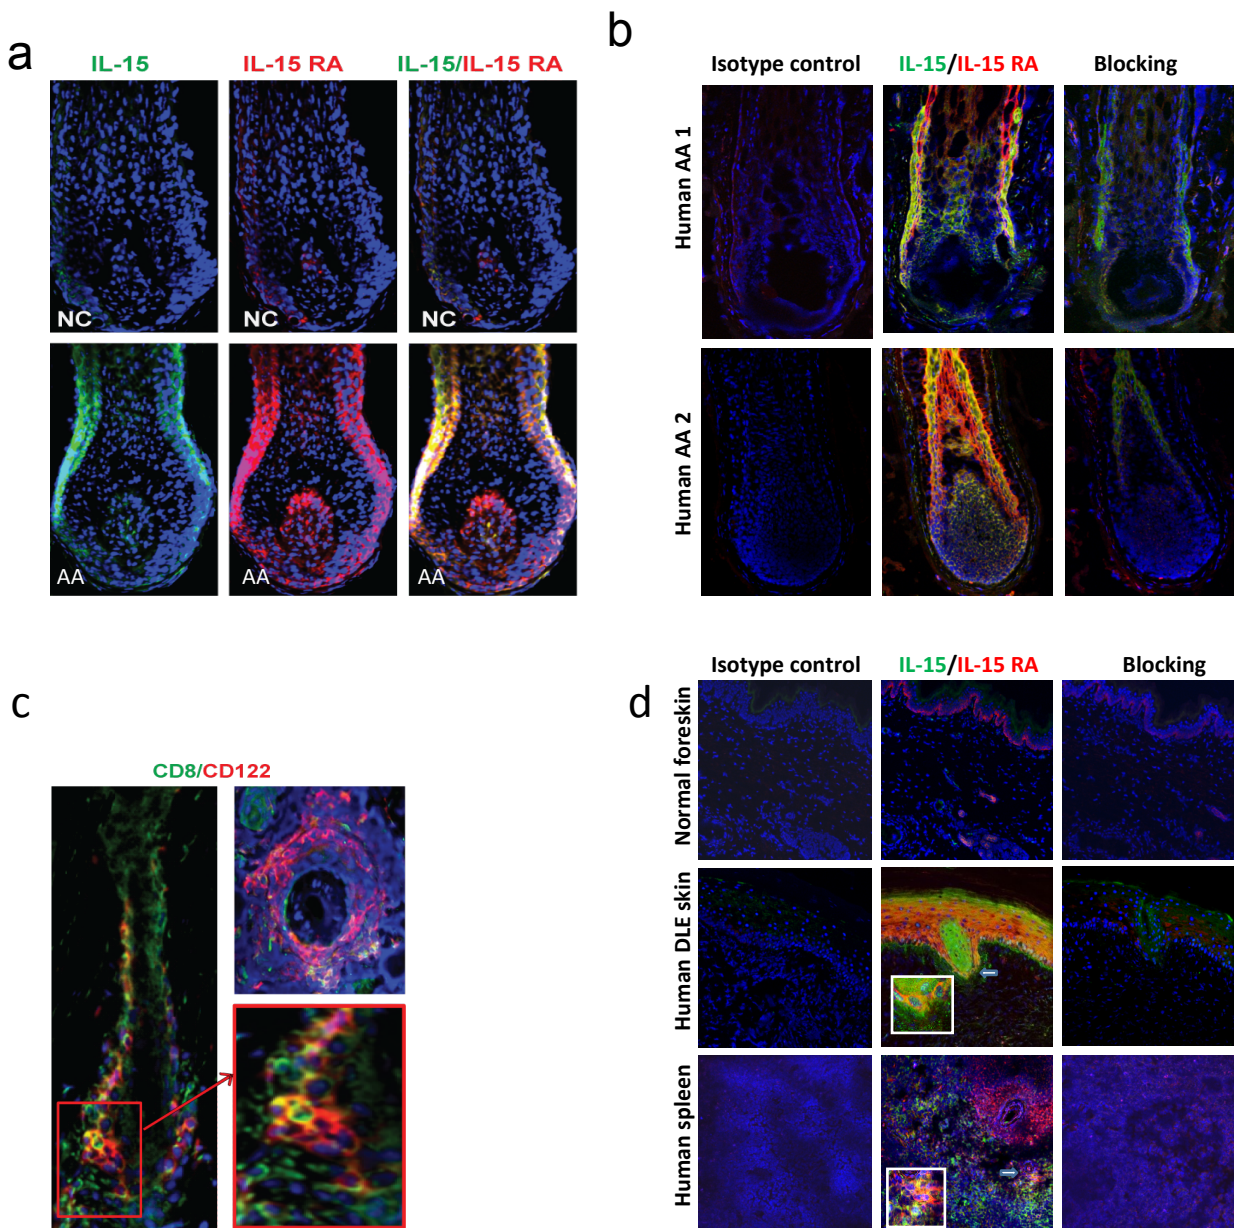

### Supplementary Figure 5. IL-15 Staining of Human AA hair follicles.

IL-15 and IL-15RA expression are upregulated in the outer root sheath of human AA (compared with normal controls, NC). a, Human hair follicles stained for IL-15, IL-15R $\alpha$ , and merged image. b, Frozen 5 $\mu$ M human hair follicle sections from two patients with AA, stained with isotype control, anti-IL-15 and anti-IL-15RA without and with blocking reagents as indicated above. c, Hair follicle infiltrates contain CD8<sup>+</sup> T cells that co-expressed CD122 (IL-15R $\beta$ ). d, As a positive control, human lesional skin from a patient with discoid lupus was used. Discoid lupus skin sample and spleen tissue show positive



staining of IL-15 and IL-15R $\alpha$ , while normal foreskin does not. Isotype control: normal rabbit IgG control for rabbit anti-IL15 antibody, or normal goat IgG for goat anti-IL15RA antibody. Blocking: IL-15 protein plus anti-IL15 antibody, or IL-15RA peptide plus anti-IL15 RA antibody.

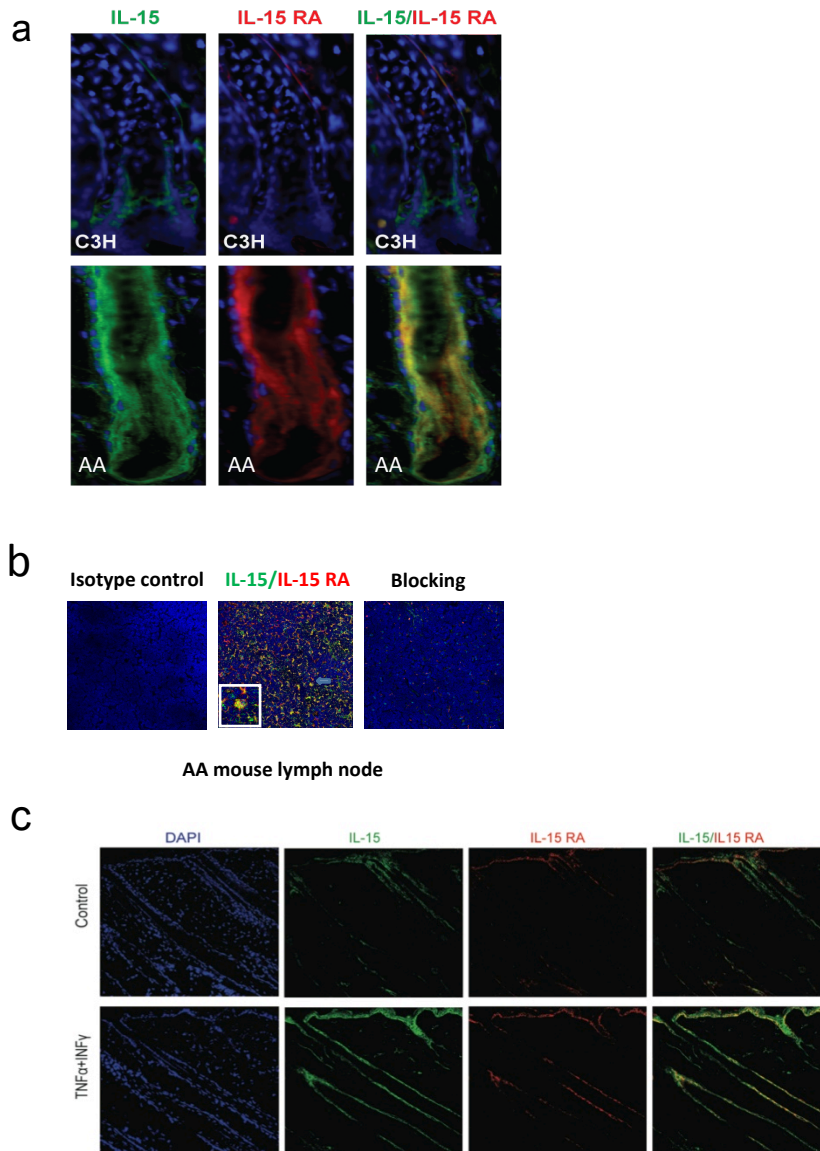

**Supplementary Figure 6. IL-15 Staining of mouse AA hair follicles.**

a, IL-15 and IL-15R $\alpha$  expression are upregulated in the outer root sheath of mouse AA (compared with non-alopecic controls, C3H). b, The positive staining of IL-15/IL-15R $\alpha$  in alopecia mouse cutaneous lymph nodes is inhibited by blocking reagents. Isotype control: normal rabbit IgG control for rabbit anti-IL15 antibody, or normal goat IgG for goat anti-IL15RA antibody. Blocking: IL-15 protein plus anti-IL15 antibody, or IL-15RA peptide plus anti-IL15R $\alpha$  antibody. c, IL-15 and IL-15R $\alpha$  expression is induced after stimulation with IFN- $\gamma$ /TNF- $\alpha$ . Mice received intradermal injections of 100  $\mu$ l PBS as

control or 1000ng IFN $\gamma$  and 250ngTNF $\alpha$  in 100ul PBS, and were sacrificed 72 hours later. Skin sections were stained for IL-15 and IL-15RA.

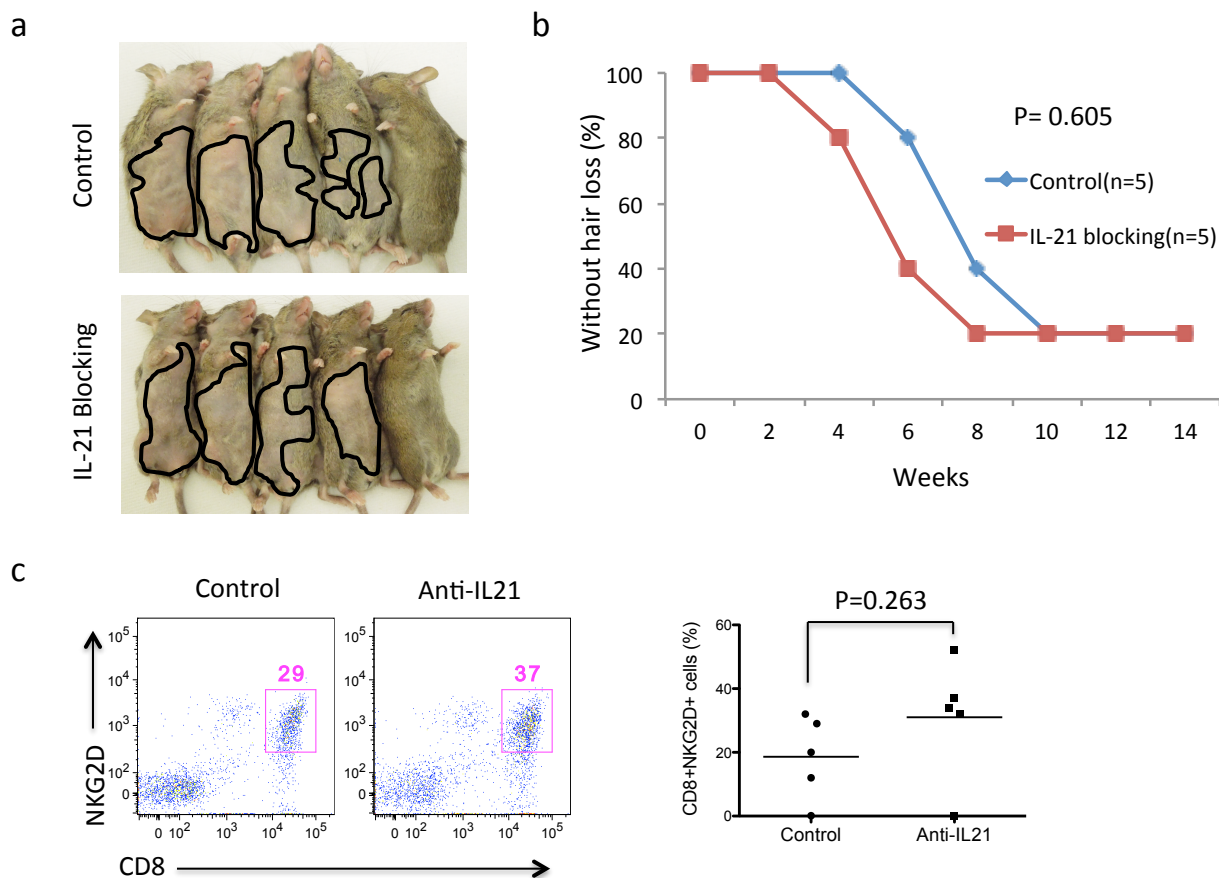

**Supplementary Figure 7. IL-21 blockade fails to prevent the onset of Alopecia Areata in C3H/HeJ mice.**

C3H/HeJ grafted mice were treated from the time of grafting with 300 mg anti-IL-21 antibody (Ebioscience, Clone FFA21) injected intraperitoneally three times a week for 14 weeks. (a) The onset of alopecia is not inhibited by anti-IL-21 treatment in grafted C3H/HeJ mice. (b) Time course of the onset of hair loss in control mice and anti-IL-21 treated mice was shown as weeks after grafting. (c) The frequency of CD8<sup>+</sup>NKG2D<sup>+</sup> T cells in skin of anti-IL-21 treated mice were not significantly different compared to control mice.

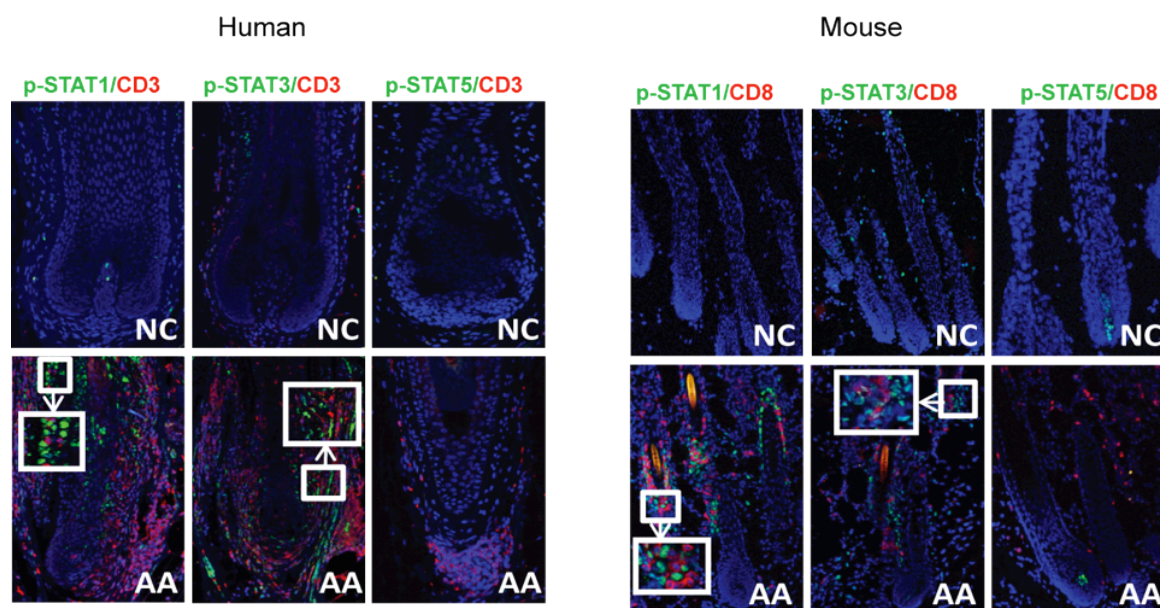

**Supplementary Figure 8. STAT expression in human and mouse hair follicles.**

Skin sections from human normal controls (top/left panels) or human AA hair follicles (bottom/left), were costained for CD3 and a phosphorylated STAT molecule as indicated above. Mouse skin sections from unaffected C3H/HeJ mice (top right) or alopecic C3H/HeJ mice (bottom right) were costained for CD8 and a phosphorylated STAT molecule as indicated above.

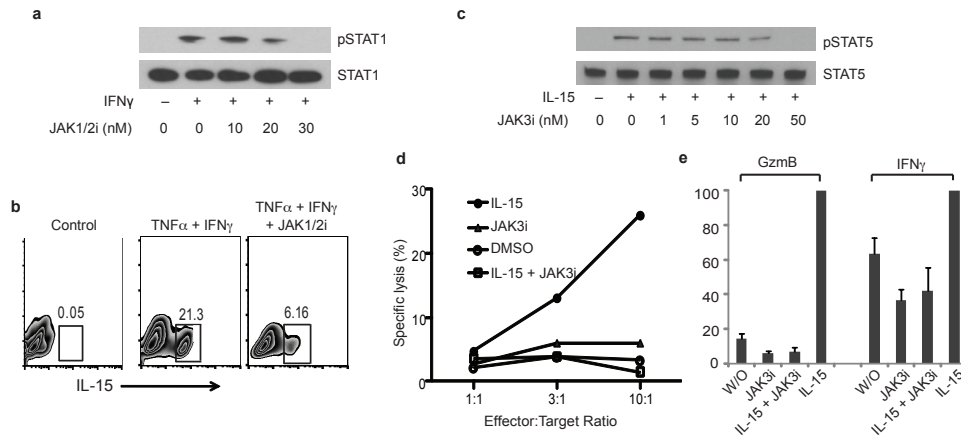

### Supplemental Figure 9. JAK inhibitors diminish responses to IFN $\gamma$ and IL-15.

a, JAK1/2i (ruxolitinib) inhibits IFN $\gamma$ -induced Stat1 activation and b, IL-15 production in dermal sheath cells. c, JAK3i (tofacitinib) inhibits IL-15-induced Stat5 activation in T cells. d, JAK3i inhibits IL-15-induced LAK cell cytotoxic function. e, JAK3i inhibits IL-15-induced LAK cell granzyme B expression and IFN $\gamma$  production.

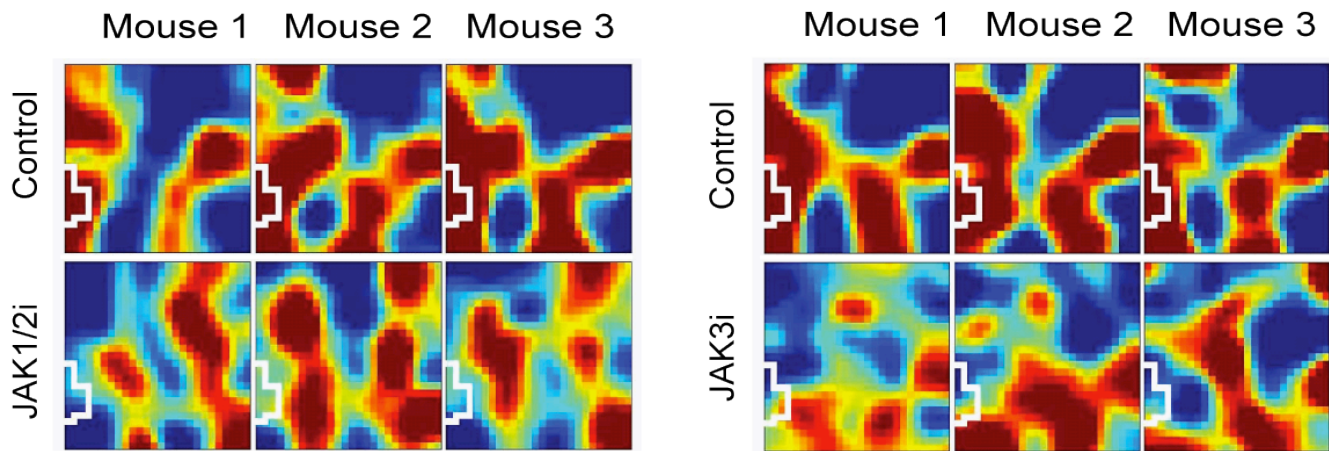

**Supplementary Figure 10. GEDI analysis from prevention studies.**

GEDI analysis was performed on gene profiles from JAK1/2i- or JAK3i- treated mice. A subjectively identified region of metagenes (white outline) that correlated with either the clinical appearance or resolution of alopecia identified many CTL and IFN related genes.



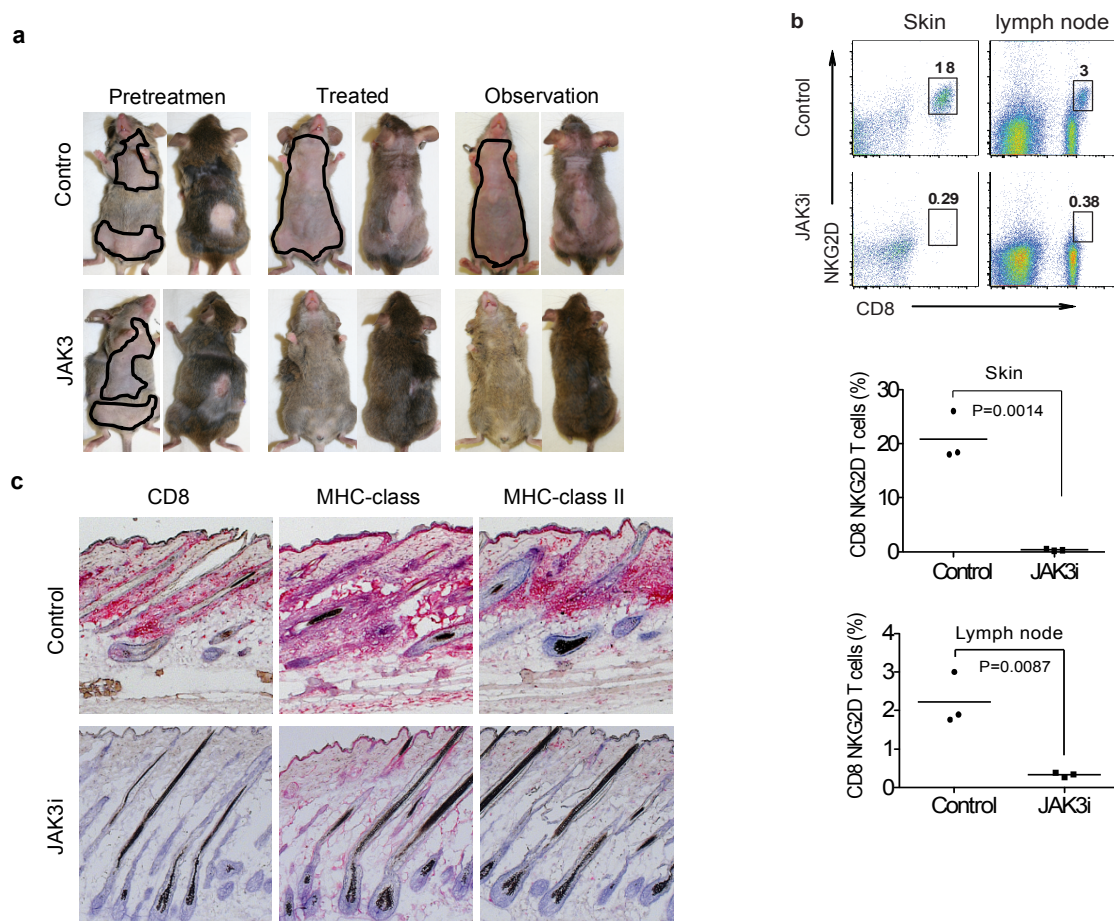

### Supplementary Figure 11. Systemic treatment of AA mice with JAK3 inhibitor.

C3H/HeJ mice with long-standing alopecia areata were treated with tofacitinib with Alzet osmotic mini-pumps (pumps, model 2004, Durect Corporation) implanted subcutaneously on the back of each mouse to deliver vehicle (poly(ethylene glycol) (PEG)300) or vehicle containing JAK3i tofacitinib (Abmole) at 15 mg/kg/day for 12 wks. **a**, Alopecia areata reversal was complete on both the back and belly, although the rate of hair regrowth was slower than with topical administration. **b**, Flow cytometric analysis of skin and cutaneous lymph node populations shows elimination of the CD8<sup>+</sup>NKG2D<sup>+</sup> T cell population in treated mice (n=3 per group). **c**, Immunostaining of skin from mice



treated with tofacitinib or placebo demonstrates elimination of CD8 infiltration and MHC I and II upregulation in tofacitinib treated mice.

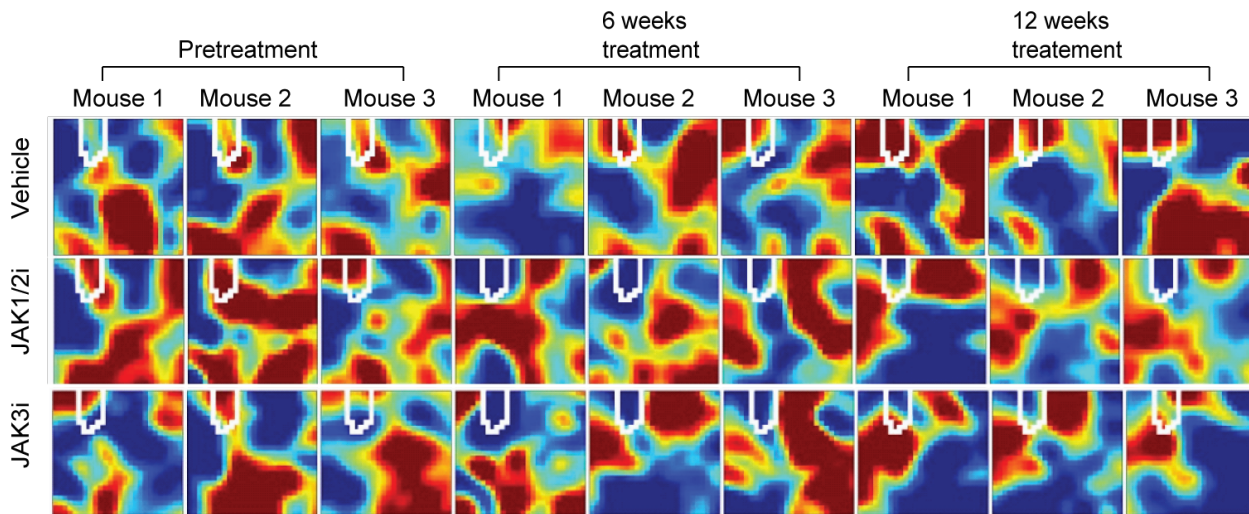

**Supplementary Figure 12. GEDI of topical treatments.**

GEDI analysis was performed on C3H/HeJ mice before treatment (left 3 rows of panels), after 6 weeks of treatment (middle 3 rows of panels), or after 12 weeks of treatment (right 3 rows of panels). Treatments included topical formulations of ruxolitinib (middle row), tofacitinib/JAK3i (bottom row) compared to vehicle control (top row).

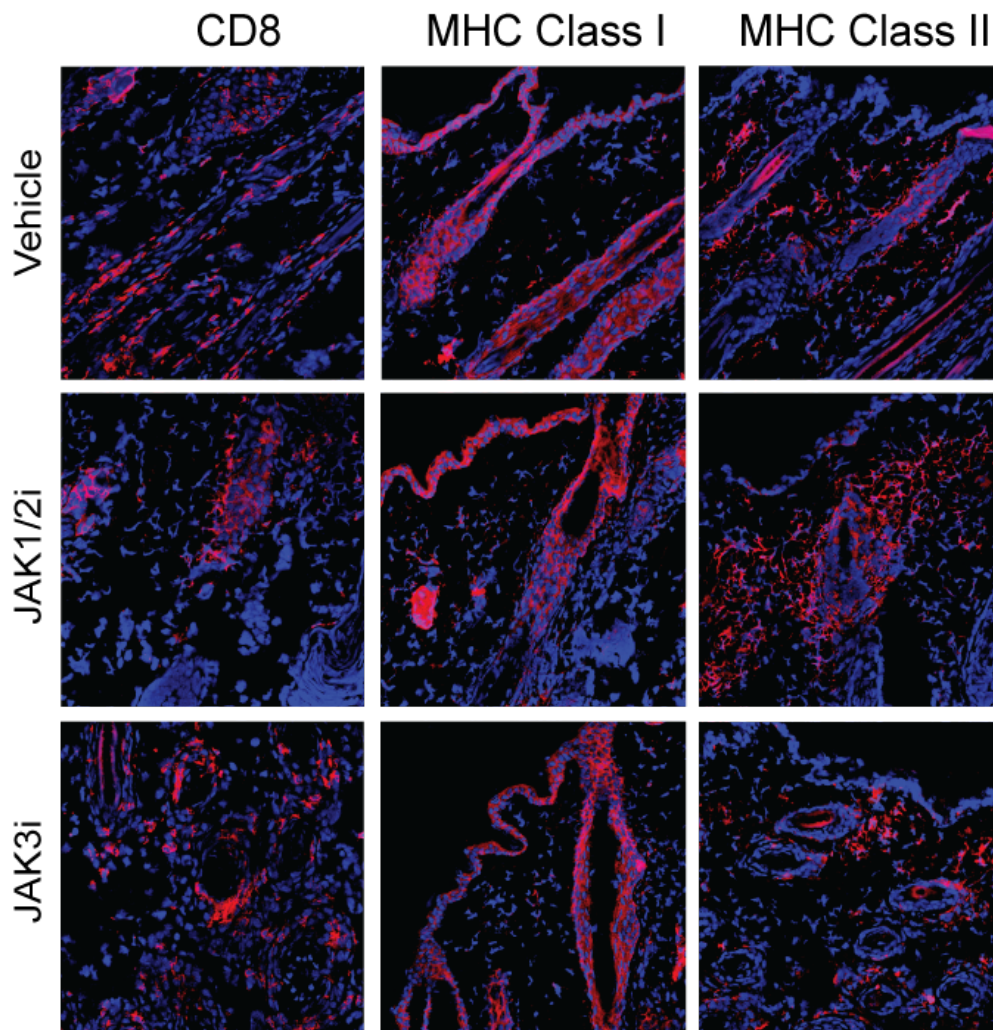

**Supplementary Figure 13. Immunofluorescence staining of untreated abdominal skin.**

Ventral skin sections from mice treated with topical formulations of vehicle control (top row), ruxolitinib/JAK1/2i (middle row), or tofacitinib/JAK3i (bottom row) on their dorsal surfaces were stained with CD8 (left column), MHC Class I (middle column), or MHC Class II (right column). All sections were costained with DAPI.

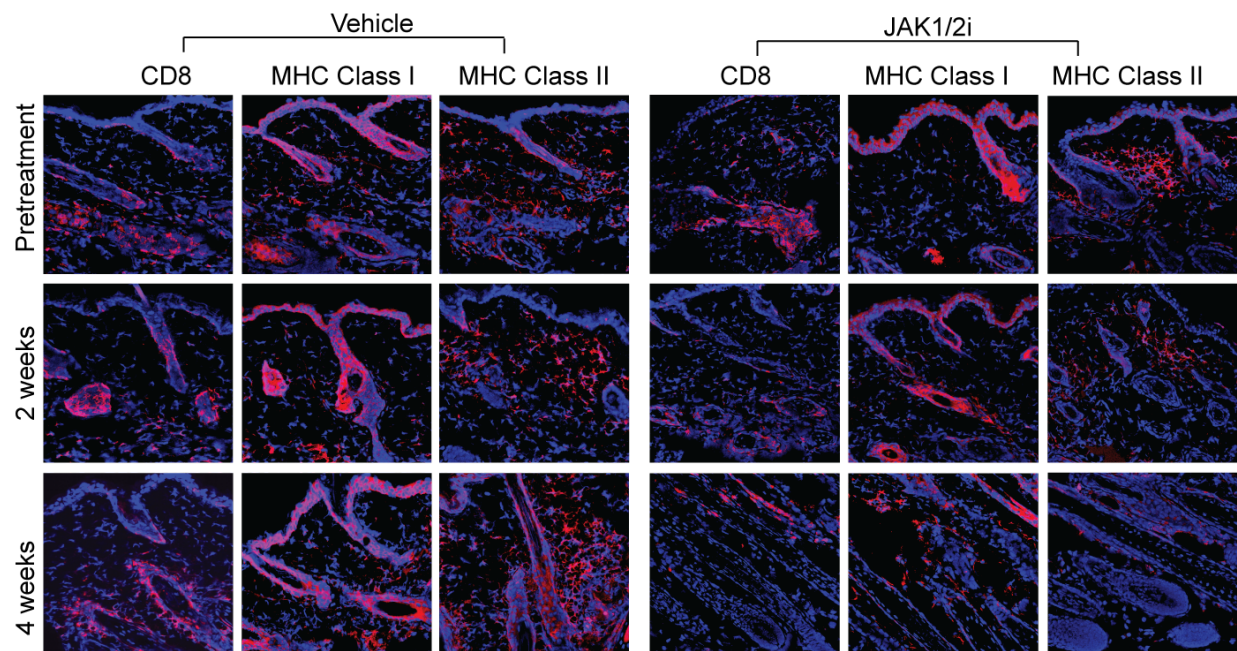

**Supplementary Figure 14. Immunofluorescence staining of skin at early timepoints during topical treatment.**

Skin sections from mice treated with topical formulations of vehicle control (left columns) or ruxolitinib/JAK1/2i (right columns) were stained with CD8, MHC Class I, or MHC Class II as indicated. Skin sections were stained prior to starting treatment (top row), or after 2 (middle row) or 4 weeks (bottom row) of treatment. All sections were costained with DAPI.



## Subject #1

### A. Baseline

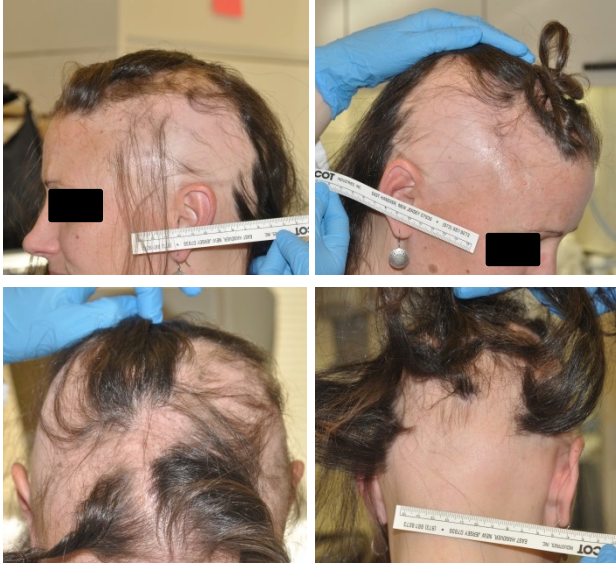

### B. 12 Weeks Ruxolitinib Treatment

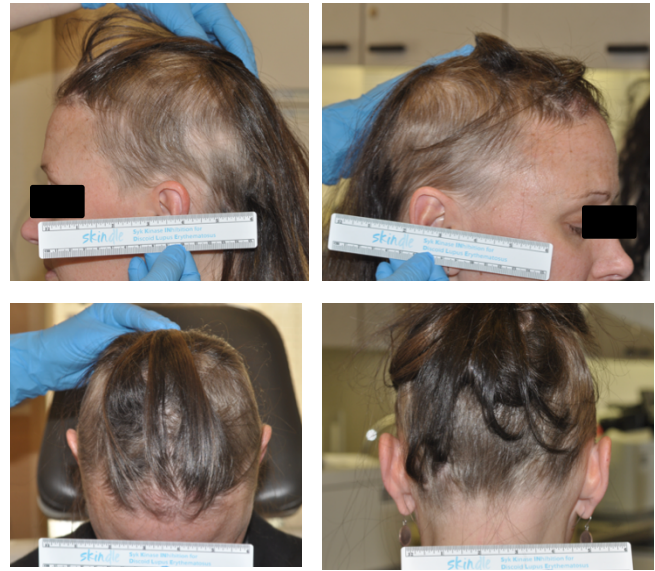

### C. 20 Weeks Ruxolitinib Treatment

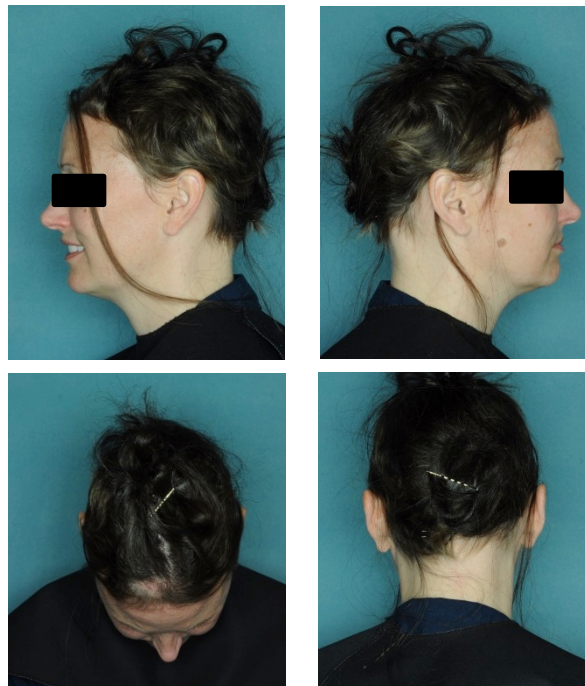

## Supplemental Figure 15. Patient #1 response to ruxolitinib.

Patient #1 at baseline (A) and after 12 weeks (B) and 20 weeks (C) of treatment. Near complete hair re-growth is seen by 20 weeks. Patient #2, data not shown, also exhibited near complete hair re-growth by 12 weeks, except in the peri-auricular areas.

**Subject #3**

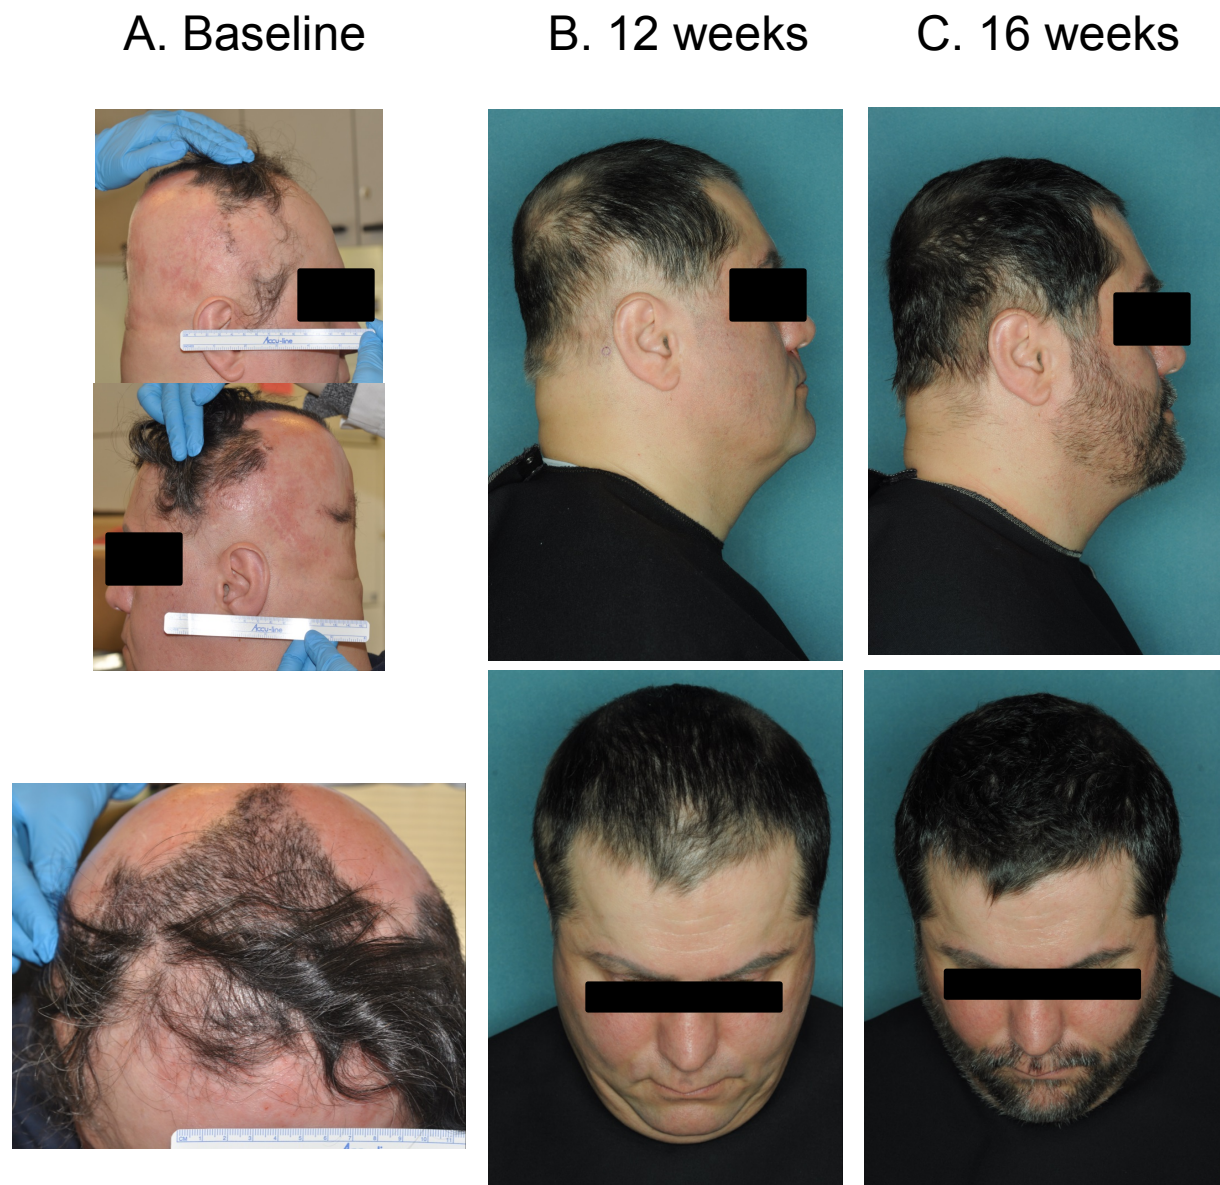

**Supplemental Figure 16. Patient #3 response to ruxolitinib.**

Patient #3 at baseline (a), after 12 weeks (b) and after 16 weeks (c) of treatment. Patients enrolled in this pilot study are anticipated to be treated until maximal response or up to 6 months of treatment, followed by observation off drug for an additional 3 months to assess response durability.

## CRITICAL CYTOKINES FOR ALOPECIC CD8 KILLER T CELLS: TARGETABLE PATHWAYS

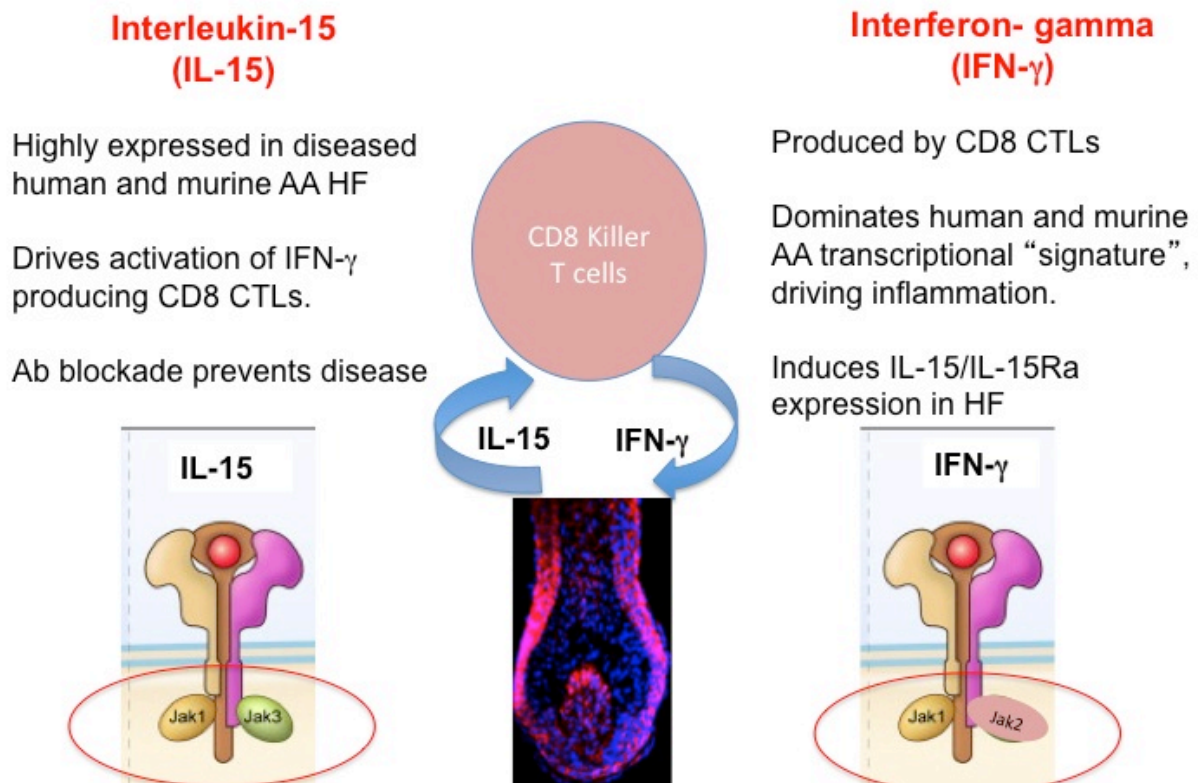

**Supplementary Figure 17. Schematic representation of our model of the IL-15/IFN $\gamma$  axis in alopecia areata and its targeting using JAKis.**

Interferon gamma and IL-15/IL-15Ra cooperate to induce a Type I cytotoxic response. CD8 T cells produce IFN $\gamma$  which breaks the immunological privilege of the hair follicle, upregulating antigen presentation (MHC I and II), inducing inflammatory chemokines (CXCL9-11), induction of NKG2DLs and upregulation of IL-15/IL-15Ra by the hair follicle. In turn, this leads to the further recruitment and activation of effector CD8<sup>+</sup>NKG2D<sup>+</sup> T cells.



**Supplementary Table 1. Differentially expressed genes in CD8<sup>+</sup>NKG2D<sup>+</sup> memory T cells vs. CD8<sup>+</sup>NKG2D<sup>-</sup> memory T cells isolated from cutaneous lymph nodes obtained from alopecic mice.**

RNAseq was performed on cDNA made isolated from flow-sorted cells (BD influx) from total cutaneous lymph nodes from three alopecic mice.

| <b>GeneSymbol</b> | <b>FC</b> |
|-------------------|-----------|
| Gstm5             | 63.99     |
| Gzma              | 52.13     |
| Ifitm1            | 44.81     |
| Cx3cr1            | 38.24     |
| Sprn              | 35.20     |
| Tjp1              | 34.76     |
| Igsf5             | 32.13     |
| Tmem132e          | 31.71     |
| Cmklr1            | 30.91     |
| 5430421N21Rik     | 30.69     |
| Csf1              | 29.97     |
| Olfr60            | 28.79     |
| 4933431E20Rik     | 27.87     |
| Metrn1            | 27.44     |
| Epdr1             | 27.43     |
| Cd244             | 27.22     |
| Gpr141            | 26.45     |
| Ccr1              | 26.17     |
| Ccr8              | 23.75     |
| Pkd2              | 23.23     |
| Lgals3            | 22.66     |
| Esm1              | 21.59     |
| AI661453          | 20.69     |
| Sema6d            | 20.58     |
| Tmem171           | 19.13     |
| Havcr2            | 19.01     |
| Rasgrf1           | 18.32     |
| Bean1             | 18.25     |
| Adora3            | 18.13     |



|          |       |
|----------|-------|
| Itga1    | 17.66 |
| Tpbg     | 17.52 |
| Gzmb     | 17.43 |
| Gpr44    | 17.11 |
| Stk32c   | 16.81 |
| Bcar1    | 16.72 |
| Cntn1    | 16.70 |
| Slc38a8  | 16.65 |
| Adam8    | 16.15 |
| Usp44    | 15.85 |
| B4galnt4 | 15.50 |
| Cass4    | 14.94 |
| Galr3    | 14.86 |
| Ifitm2   | 14.77 |
| Rimbp2   | 14.64 |
| Fam171b  | 14.02 |
| Srxn1    | 13.78 |
| Ptger3   | 13.70 |
| Lrat     | 13.48 |
| Trpm6    | 13.43 |
| Lrrn2    | 13.17 |
| Arnt2    | 13.06 |
| Yap1     | 13.04 |
| Anxa1    | 12.85 |
| Gpr56    | 12.78 |
| Rai14    | 12.59 |
| Lypd3    | 12.52 |
| Gm5127   | 12.23 |
| Pdgfrb   | 12.13 |
| Tktl1    | 11.87 |
| Gzmk     | 11.63 |
| Olfr525  | 11.61 |
| AF529169 | 11.57 |
| Olfr523  | 11.48 |
| Selm     | 11.43 |
| Sema4c   | 11.25 |
| Ppp2r2c  | 11.12 |
| Fxyd4    | 11.09 |
| Sept5    | 11.07 |
| Styk1    | 11.04 |
| Myadm    | 10.84 |
| Wnt10b   | 10.65 |
| Fgl2     | 10.61 |

|               |       |
|---------------|-------|
| Gcnt4         | 10.59 |
| Emp1          | 10.44 |
| Cacng8        | 10.38 |
| Car5b         | 10.36 |
| Ly6g5b        | 10.32 |
| Lmna          | 10.16 |
| Vipr2         | 10.08 |
| Ptpn5         | 10.01 |
| Plekhf1       | 9.92  |
| Il13          | 9.87  |
| 9430020K01Rik | 9.87  |
| Klrk1         | 9.80  |
| Itsn1         | 9.65  |
| Ret           | 9.62  |
| Itgae         | 9.58  |
| Col6a3        | 9.50  |
| Nbea          | 9.41  |
| Rab27b        | 9.41  |
| Clec12a       | 9.36  |
| Mgat3         | 9.35  |
| Zfp57         | 9.30  |
| S100a4        | 9.27  |
| AI414108      | 9.22  |
| Trim58        | 9.19  |
| Irak3         | 9.18  |
| Gpr34         | 9.15  |
| Mt3           | 9.04  |
| AW555464      | 9.02  |
| Perp          | 9.00  |
| Ace           | 8.94  |
| Tmeff2        | 8.92  |
| Slc35f3       | 8.81  |
| Dyrk3         | 8.81  |
| Nxn12         | 8.72  |
| Galnt3        | 8.67  |
| Cish          | 8.63  |
| Vash1         | 8.58  |
| Klre1         | 8.58  |
| Dmrt2         | 8.56  |
| Wnt9a         | 8.48  |
| Dusp14        | 8.43  |
| Dmd           | 8.29  |
| St6galnac2    | 8.26  |

|               |      |
|---------------|------|
| Slc41a2       | 8.26 |
| Cdh1          | 8.22 |
| Tead1         | 8.09 |
| Msc           | 8.05 |
| Ttc39c        | 8.01 |
| Slc27a6       | 7.94 |
| Hlx           | 7.85 |
| Mid2          | 7.73 |
| Plod2         | 7.70 |
| Prkcc         | 7.68 |
| Ptgs1         | 7.63 |
| 6430571L13Rik | 7.60 |
| Specc1        | 7.55 |
| Prss16        | 7.53 |
| Fam129b       | 7.49 |
| Spns3         | 7.49 |
| Lonrf3        | 7.45 |
| Fat4          | 7.41 |
| Nphs2         | 7.39 |
| Cpd           | 7.34 |
| Cdkn2a        | 7.26 |
| Il17rd        | 7.14 |
| Nebl          | 7.12 |
| Src           | 7.10 |
| Scn1b         | 7.07 |
| Sccpdh        | 7.04 |
| Igsf9b        | 7.03 |
| Crispld2      | 7.02 |
| Plscr4        | 7.01 |
| Tmigd1        | 6.96 |
| Camk2n1       | 6.95 |
| Trat1         | 6.87 |
| Mtap6         | 6.85 |
| Qpct          | 6.85 |
| Thsd7b        | 6.82 |
| Tceal3        | 6.76 |
| Nlrp12        | 6.75 |
| 2010002N04Rik | 6.70 |
| Lat2          | 6.68 |
| Susd2         | 6.61 |
| Ptprj         | 6.61 |
| P2ry14        | 6.56 |
| Csgalnact1    | 6.55 |

|               |      |
|---------------|------|
| Klri2         | 6.54 |
| 1700001C19Rik | 6.48 |
| Spp1          | 6.43 |
| Hlf           | 6.41 |
| Gpx8          | 6.39 |
| a             | 6.37 |
| Rtn4r         | 6.31 |
| Lamc1         | 6.25 |
| Kndc1         | 6.23 |
| Slc22a15      | 6.19 |
| Id2           | 6.15 |
| Tnfsf13b      | 6.14 |
| Elovl4        | 6.13 |
| 5830411N06Rik | 6.04 |
| Plxnd1        | 6.00 |
| Vstm2a        | 5.98 |
| Rora          | 5.96 |
| Il2           | 5.93 |
| Klrc1         | 5.92 |
| Tesc          | 5.86 |
| Cd40lg        | 5.84 |
| Glis2         | 5.84 |
| Mt1           | 5.83 |
| Mdfic         | 5.82 |
| P2ry2         | 5.73 |
| Hpse          | 5.72 |
| Ttc16         | 5.70 |
| Kitl          | 5.66 |
| Arhgef25      | 5.65 |
| Foxf2         | 5.62 |
| Kir3dl2       | 5.56 |
| Unc79         | 5.52 |
| Aim1l         | 5.47 |
| Rgag4         | 5.44 |
| Pygl          | 5.41 |
| Efcab6        | 5.39 |
| Htra3         | 5.39 |
| Card10        | 5.39 |
| Nek6          | 5.38 |
| 6720401G13Rik | 5.36 |
| Fam131b       | 5.36 |
| Grb14         | 5.34 |
| Pde1c         | 5.33 |

|               |      |
|---------------|------|
| Pld1          | 5.31 |
| Gipc2         | 5.30 |
| 8430427H17Rik | 5.30 |
| Gabarapl1     | 5.29 |
| Olfir527      | 5.28 |
| Tenc1         | 5.27 |
| Snx7          | 5.27 |
| Rgs8          | 5.25 |
| Slc16a7       | 5.24 |
| Alcam         | 5.23 |
| Tmbim1        | 5.23 |
| Nefl          | 5.22 |
| Pdcd1         | 5.21 |
| 2810030E01Rik | 5.21 |
| Abhd3         | 5.19 |
| Clnk          | 5.18 |
| Nlrp1b        | 5.14 |
| Cav2          | 5.13 |
| Aff2          | 5.12 |
| Kbtbd13       | 5.10 |
| Ppap2a        | 5.07 |
| Gm14718       | 5.06 |
| Pde4a         | 5.03 |
| Cnga2         | 4.95 |
| Acvr1l1       | 4.92 |
| Mapkapk3      | 4.92 |
| Ccr2          | 4.87 |
| Hip1          | 4.84 |
| Pkp2          | 4.83 |
| Nap1l3        | 4.83 |
| Gorasp1       | 4.82 |
| Zfp651        | 4.82 |
| Hmga2-ps1     | 4.81 |
| Tceal1        | 4.81 |
| Atp1a2        | 4.81 |
| 2200002K05Rik | 4.81 |
| Mmp2          | 4.77 |
| Ankrd35       | 4.77 |
| Klrc2         | 4.77 |
| Ptgfrn        | 4.74 |
| Ildr1         | 4.66 |
| Ptpn3         | 4.64 |
| 5031425F14Rik | 4.62 |

|               |      |
|---------------|------|
| 2510009E07Rik | 4.58 |
| Emilin2       | 4.58 |
| 2900026A02Rik | 4.57 |
| Cd101         | 4.54 |
| 9030425E11Rik | 4.52 |
| 1500009L16Rik | 4.50 |
| Cdh17         | 4.48 |
| Clec5a        | 4.48 |
| Dnahc9        | 4.47 |
| Gpr25         | 4.45 |
| Ifng          | 4.44 |
| Socs2         | 4.42 |
| Pard3         | 4.42 |
| Nhsl2         | 4.41 |
| Layn          | 4.40 |
| Csf2          | 4.35 |
| Crybb3        | 4.30 |
| Cxcr6         | 4.30 |
| Zeb2          | 4.27 |
| Prkar2b       | 4.27 |
| Fam70a        | 4.26 |
| Gdpd5         | 4.23 |
| Gm8773        | 4.22 |
| Fbn1          | 4.20 |
| Itgax         | 4.20 |
| Rbpj          | 4.17 |
| Cxcl13        | 4.15 |
| Tmem2         | 4.14 |
| Tmem205       | 4.14 |
| Klrc3         | 4.13 |
| Gcnt1         | 4.13 |
| Zc3h12c       | 4.12 |
| Mir1199       | 4.09 |
| Ermn          | 4.08 |
| Agap1         | 4.07 |
| 1810033B17Rik | 4.07 |
| Klf8          | 4.06 |
| 4831426I19Rik | 4.06 |
| Ninl          | 4.06 |
| Fbxo44        | 4.04 |
| Rab39b        | 4.03 |
| Tspan2        | 4.02 |
| Adrb1         | 4.00 |

|               |      |
|---------------|------|
| Spns2         | 3.98 |
| Osbpl3        | 3.97 |
| Rapsn         | 3.96 |
| Dhrs9         | 3.94 |
| Mboat2        | 3.90 |
| Pparg         | 3.90 |
| Clip4         | 3.89 |
| Apol9a        | 3.88 |
| Marveld2      | 3.86 |
| Capn5         | 3.86 |
| Ranbp17       | 3.86 |
| Ncam1         | 3.85 |
| Ctnnd2        | 3.85 |
| Slc25a24      | 3.85 |
| Palm          | 3.84 |
| Fcer1g        | 3.79 |
| Gzmc          | 3.78 |
| Prdm1         | 3.78 |
| Scn8a         | 3.75 |
| Fkbp9         | 3.72 |
| Gstt1         | 3.71 |
| Adssl1        | 3.71 |
| Prrg4         | 3.71 |
| Kir3dl1       | 3.70 |
| Ssbp2         | 3.67 |
| Swap70        | 3.67 |
| Trp73         | 3.67 |
| Il12rb2       | 3.66 |
| Phka1         | 3.66 |
| Xcr1          | 3.65 |
| Stau2         | 3.64 |
| 9130019P16Rik | 3.63 |
| Clec7a        | 3.63 |
| 6430531B16Rik | 3.63 |
| Marco         | 3.62 |
| Sulf2         | 3.61 |
| Reep1         | 3.61 |
| Anxa4         | 3.61 |
| Procr         | 3.60 |
| Slc40a1       | 3.60 |
| Tnfrsf8       | 3.59 |
| Matk          | 3.56 |
| Cysltr2       | 3.56 |

|               |      |
|---------------|------|
| Smtn          | 3.55 |
| Rasl11b       | 3.54 |
| Amph          | 3.52 |
| Cysltr1       | 3.52 |
| Klri1         | 3.52 |
| B4galt2       | 3.51 |
| Mlf1          | 3.49 |
| B4galt4       | 3.49 |
| Slc4a11       | 3.47 |
| Htra1         | 3.47 |
| Ebf1          | 3.44 |
| Mpp2          | 3.44 |
| Ica1          | 3.44 |
| Tigit         | 3.43 |
| Lzts1         | 3.43 |
| Epha3         | 3.43 |
| Mrgpre        | 3.43 |
| Vdr           | 3.42 |
| Npnt          | 3.41 |
| D630039A03Rik | 3.40 |
| Rapgef3       | 3.37 |
| Cnksr1        | 3.37 |
| Napsa         | 3.37 |
| E030011O05Rik | 3.37 |
| 1700019E19Rik | 3.37 |
| Ncald         | 3.37 |
| Ccl8          | 3.36 |
| Dhrs3         | 3.36 |
| Ppap2b        | 3.36 |
| Gas2l1        | 3.36 |
| St3gal2       | 3.35 |
| Phactr2       | 3.34 |
| Rasd1         | 3.34 |
| Mafa          | 3.33 |
| Olfr433       | 3.33 |
| L1cam         | 3.31 |
| Pik3r6        | 3.31 |
| C1qa          | 3.31 |
| Fgd1          | 3.30 |
| Gm17745       | 3.30 |
| Apol9b        | 3.30 |
| Cmtm7         | 3.29 |
| Bicd1         | 3.29 |



|               |      |
|---------------|------|
| Rgs2          | 3.29 |
| Nos1ap        | 3.29 |
| Bcl2a1d       | 3.29 |
| Eif4e3        | 3.28 |
| Sgtb          | 3.28 |
| Fut7          | 3.28 |
| Kif19a        | 3.27 |
| Mtmr7         | 3.27 |
| Fam114a1      | 3.27 |
| Sdc4          | 3.27 |
| Farp1         | 3.26 |
| Fbxl21        | 3.25 |
| Ccr12         | 3.25 |
| H1fx          | 3.24 |
| Eif2c4        | 3.24 |
| Ube2l6        | 3.23 |
| Gpr68         | 3.23 |
| 4930544D05Rik | 3.23 |
| Hrh4          | 3.22 |
| Ryr1          | 3.22 |
| 9030418K01Rik | 3.22 |
| Acot11        | 3.22 |
| Pon3          | 3.22 |
| Serpine2      | 3.20 |
| Ly6a          | 3.20 |
| Lrrn3         | 3.19 |
| B3galt5       | 3.19 |
| Ankrd29       | 3.19 |
| Ccl1          | 3.19 |
| Serpina3f     | 3.19 |
| St14          | 3.15 |
| Dscam         | 3.14 |
| Fam129a       | 3.14 |
| Med12l        | 3.14 |
| 1300014I06Rik | 3.13 |
| Rnf216        | 3.13 |
| St3gal5       | 3.13 |
| Slc35e4       | 3.12 |
| Rab3il1       | 3.12 |
| Tmem176a      | 3.12 |
| Syng3         | 3.12 |
| Il9r          | 3.12 |
| Lrrk2         | 3.11 |

|               |      |
|---------------|------|
| Zfp532        | 3.11 |
| Ache          | 3.10 |
| Wipf3         | 3.09 |
| Cdkn1a        | 3.09 |
| Ccdc136       | 3.08 |
| Epn2          | 3.07 |
| Fam167a       | 3.07 |
| Syp           | 3.07 |
| Spry2         | 3.06 |
| Tiam1         | 3.06 |
| Gnaq          | 3.05 |
| Armxc6        | 3.05 |
| Raph1         | 3.05 |
| F730043M19Rik | 3.05 |
| Lag3          | 3.05 |
| Wscd1         | 3.04 |
| Dkk1          | 3.04 |
| Zfp839        | 3.04 |
| Armxc1        | 3.03 |
| Zkscan16      | 3.03 |
| 1700009P17Rik | 3.02 |
| Nkd1          | 3.01 |
| Cdkn2b        | 3.01 |
| Igfbp6        | 3.01 |
| Dlg2          | 3.01 |
| Plscr1        | 3.00 |
| Cacna1i       | 3.00 |
| Ckm           | 3.00 |
| Kcnmb4        | 3.00 |
| Arhgap8       | 2.99 |
| Gspt2         | 2.99 |
| Foxd2         | 2.98 |
| Vat1l         | 2.98 |
| Bfsp2         | 2.98 |
| Prrt2         | 2.98 |
| Wbscr17       | 2.98 |
| Car13         | 2.98 |
| Muc20         | 2.97 |
| Bzrap1        | 2.96 |
| Frem2         | 2.96 |
| Fcer2a        | 2.96 |
| Chn2          | 2.95 |
| Blk           | 2.95 |

|               |      |
|---------------|------|
| Kcnk5         | 2.95 |
| Mpzl1         | 2.95 |
| Aplp1         | 2.95 |
| Tlr4          | 2.95 |
| H2-DMb2       | 2.95 |
| Lyn           | 2.94 |
| Meis2         | 2.94 |
| Camk1         | 2.93 |
| Pacsin3       | 2.93 |
| Tub           | 2.93 |
| Cebpd         | 2.93 |
| Gm5111        | 2.92 |
| Fasl          | 2.92 |
| Lpcat2        | 2.91 |
| Mybpc2        | 2.90 |
| Syt13         | 2.90 |
| H2-Eb2        | 2.90 |
| Hdac11        | 2.89 |
| Slc43a3       | 2.89 |
| Klf12         | 2.89 |
| Blnk          | 2.89 |
| Atp2b4        | 2.88 |
| Faim3         | 2.88 |
| C1qc          | 2.88 |
| Epb4.1l3      | 2.87 |
| Ms4a1         | 2.87 |
| Prr5l         | 2.86 |
| Fcrla         | 2.86 |
| Eil3          | 2.86 |
| Prdx4         | 2.85 |
| Adcy9         | 2.85 |
| Pbx3          | 2.85 |
| Chmp4c        | 2.84 |
| Osbpl1a       | 2.84 |
| Apbb1         | 2.84 |
| Cd79a         | 2.84 |
| Slc6a8        | 2.83 |
| Zcchc14       | 2.83 |
| 5730416F02Rik | 2.83 |
| Gm9199        | 2.82 |
| Ern1          | 2.82 |
| Lxn           | 2.82 |
| Armc2         | 2.82 |

|               |      |
|---------------|------|
| Cr2           | 2.82 |
| Ptpn13        | 2.81 |
| Bcl11a        | 2.81 |
| Scd1          | 2.81 |
| Chst3         | 2.80 |
| Gcnt2         | 2.80 |
| Lyl1          | 2.80 |
| Itga2         | 2.79 |
| Scn4a         | 2.78 |
| Ccl5          | 2.78 |
| March1        | 2.76 |
| Siglecg       | 2.76 |
| Islr          | 2.76 |
| Spib          | 2.76 |
| Ndrp1         | 2.75 |
| Tex15         | 2.75 |
| Rgs1          | 2.74 |
| 5031414D18Rik | 2.74 |
| Frmd4b        | 2.74 |
| Ankrd6        | 2.74 |
| Bcar3         | 2.74 |
| Rhbdf1        | 2.72 |
| Slco4a1       | 2.72 |
| Capg          | 2.71 |
| H2-DMb1       | 2.71 |
| Hhex          | 2.71 |
| Postn         | 2.71 |
| Myo1e         | 2.71 |
| Il15          | 2.70 |
| Soat2         | 2.69 |
| Casp1         | 2.69 |
| Itga3         | 2.69 |
| Rtn1          | 2.68 |
| Sema6b        | 2.68 |
| Ciita         | 2.68 |
| Hao           | 2.68 |
| Atf6          | 2.68 |
| Kcng1         | 2.67 |
| Ptk7          | 2.67 |
| Kdelc2        | 2.67 |
| Cd180         | 2.67 |
| Rhbdl3        | 2.66 |
| Cd86          | 2.66 |

|               |      |
|---------------|------|
| Naip5         | 2.66 |
| Slc15a3       | 2.65 |
| BC013712      | 2.65 |
| Cd74          | 2.64 |
| C77080        | 2.64 |
| Fam43a        | 2.63 |
| S100a6        | 2.63 |
| Lmo2          | 2.63 |
| Col8a2        | 2.63 |
| Celf5         | 2.63 |
| Lhfpl4        | 2.63 |
| Col1a1        | 2.62 |
| Ppap2c        | 2.62 |
| Ccl3          | 2.62 |
| Rasgrp3       | 2.62 |
| Klhl30        | 2.62 |
| Clu           | 2.62 |
| Cd19          | 2.61 |
| Syk           | 2.61 |
| Cpne7         | 2.61 |
| Rasgef1b      | 2.61 |
| Gm11435       | 2.60 |
| Vpreb3        | 2.60 |
| Lhx2          | 2.58 |
| Cybb          | 2.58 |
| Mapk8ip1      | 2.58 |
| Hck           | 2.57 |
| 1110046J04Rik | 2.57 |
| Fam59a        | 2.57 |
| Stx11         | 2.56 |
| Btk           | 2.56 |
| H1f0          | 2.56 |
| Vav3          | 2.56 |
| F2rl2         | 2.55 |
| Hspa2         | 2.55 |
| Slc29a4       | 2.55 |
| Tubb4a        | 2.54 |
| Arsb          | 2.54 |
| Trim7         | 2.54 |
| Mef2c         | 2.54 |
| Asb14         | 2.54 |
| 2010001M09Rik | 2.54 |
| Ehd2          | 2.54 |

|               |      |
|---------------|------|
| Itpripl2      | 2.53 |
| Ifitm3        | 2.53 |
| Zfp941        | 2.53 |
| Pax5          | 2.53 |
| Cd24a         | 2.52 |
| Arhgef40      | 2.51 |
| Rab30         | 2.51 |
| H2-Eb1        | 2.50 |
| Serpinb6a     | 2.50 |
| Kynu          | 2.50 |
| Klra7         | 2.48 |
| Maf           | 2.48 |
| Fcgr2b        | 2.48 |
| H2-Ea-ps      | 2.47 |
| Crip3         | 2.47 |
| Abhd4         | 2.47 |
| Fcrl1         | 2.47 |
| Egln3         | 2.47 |
| Kif15         | 2.46 |
| H2-Ab1        | 2.46 |
| Jazf1         | 2.46 |
| Dennd5a       | 2.46 |
| Hgfac         | 2.45 |
| Rtp3          | 2.45 |
| 9130206I24Rik | 2.45 |
| Cited2        | 2.45 |
| Sult4a1       | 2.45 |
| Gls2          | 2.44 |
| Cd80          | 2.44 |
| Tmem176b      | 2.44 |
| Vcam1         | 2.44 |
| Ptms          | 2.43 |
| Tmem154       | 2.43 |
| Ccl4          | 2.43 |
| Rgs16         | 2.42 |
| Pawr          | 2.42 |
| Wdfy4         | 2.42 |
| Olfm1         | 2.42 |
| H2-Aa         | 2.42 |
| Stac2         | 2.41 |
| Il18          | 2.40 |
| Fam164a       | 2.40 |
| Phlda3        | 2.39 |

|               |      |
|---------------|------|
| Ctnnal1       | 2.39 |
| Tnfsf10       | 2.39 |
| Cubn          | 2.38 |
| Abi2          | 2.38 |
| 2410004P03Rik | 2.38 |
| Trim36        | 2.38 |
| Bmf           | 2.37 |
| Adap1         | 2.36 |
| Rarg          | 2.36 |
| Tmem151a      | 2.36 |
| Ly6d          | 2.36 |
| Irf5          | 2.35 |
| Bhlhe40       | 2.35 |
| Zfp608        | 2.34 |
| Fam184a       | 2.33 |
| Mafb          | 2.33 |
| Coch          | 2.32 |
| Gpr179        | 2.32 |
| Ffar1         | 2.32 |
| H2-Ob         | 2.32 |
| Nav2          | 2.32 |
| Srpk3         | 2.31 |
| Cd209b        | 2.31 |
| Arhgef12      | 2.31 |
| Arvcf         | 2.31 |
| Serpina3g     | 2.30 |
| Ppp1r3f       | 2.30 |
| Cdc25c        | 2.30 |
| Tmem159       | 2.30 |
| Atcay         | 2.30 |
| Sept4         | 2.29 |
| Cacna1e       | 2.29 |
| Plxna1        | 2.29 |
| Fzd6          | 2.29 |
| Zcchc24       | 2.29 |
| Ttbk1         | 2.28 |
| Cd40          | 2.28 |
| Atp6v0a1      | 2.28 |
| Gnao1         | 2.27 |
| Gsg2          | 2.27 |
| Dock5         | 2.26 |
| Tlr9          | 2.26 |
| Fbxo6         | 2.26 |

|               |      |
|---------------|------|
| 2410022L05Rik | 2.26 |
| Ltbp4         | 2.25 |
| Ncf2          | 2.25 |
| Cela1         | 2.25 |
| Ncr1          | 2.25 |
| Irf4          | 2.25 |
| Bank1         | 2.24 |
| Ell2          | 2.23 |
| 1190002F15Rik | 2.23 |
| Unc5b         | 2.23 |
| Bspry         | 2.23 |
| D17H6S56E-3   | 2.23 |
| Chst2         | 2.23 |
| Slc41a3       | 2.22 |
| Ctla2b        | 2.22 |
| Gas2l3        | 2.22 |
| Casp4         | 2.22 |
| Dcxr          | 2.21 |
| Ndr4          | 2.21 |
| Muc1          | 2.21 |
| Lass6         | 2.21 |
| Pls3          | 2.21 |
| Dok3          | 2.20 |
| Carhsp1       | 2.20 |
| Ppfibp1       | 2.20 |
| Stxbp1        | 2.20 |
| Ctsh          | 2.20 |
| Edaradd       | 2.20 |
| Galnt10       | 2.20 |
| Prr5          | 2.19 |
| Rcbtb2        | 2.19 |
| Pik3c2b       | 2.19 |
| Nqo2          | 2.19 |
| Fbxo30        | 2.18 |
| Mki67         | 2.17 |
| Prnp          | 2.17 |
| Ahr           | 2.16 |
| C030034L19Rik | 2.16 |
| Lgals1        | 2.16 |
| Gm11110       | 2.15 |
| Jup           | 2.15 |
| Fam20a        | 2.15 |
| Sfpi1         | 2.15 |



|               |      |
|---------------|------|
| Lrfn4         | 2.14 |
| Cdkn2c        | 2.14 |
| Crybg3        | 2.14 |
| Trerf1        | 2.14 |
| Dok4          | 2.14 |
| Cdk6          | 2.13 |
| S1pr3         | 2.13 |
| Rxra          | 2.13 |
| Cd163l1       | 2.12 |
| Pwwp2b        | 2.12 |
| 1700017B05Rik | 2.12 |
| 2310010M20Rik | 2.12 |
| Nek2          | 2.12 |
| Lix1l         | 2.12 |
| Ggta1         | 2.11 |
| Rorc          | 2.11 |
| Fosb          | 2.11 |
| Rimkla        | 2.11 |
| Txlnb         | 2.10 |
| Smox          | 2.10 |
| Tcf4          | 2.10 |
| Fgd2          | 2.10 |
| Cd300lf       | 2.10 |
| Map3k13       | 2.10 |
| Neil3         | 2.09 |
| Optn          | 2.09 |
| A930038C07Rik | 2.09 |
| Klra5         | 2.08 |
| Cyp4f18       | 2.08 |
| Akap17b       | 2.08 |
| 2700081O15Rik | 2.07 |
| Pcyox1l       | 2.07 |
| Cd226         | 2.07 |
| Aurkb         | 2.07 |
| St6galnac6    | 2.06 |
| Mfge8         | 2.06 |
| Slamf1        | 2.06 |
| Zdhhc2        | 2.06 |
| Bag2          | 2.05 |
| Gpr55         | 2.05 |
| Dip2a         | 2.05 |
| BC064078      | 2.05 |
| S1pr5         | 2.05 |

|               |      |
|---------------|------|
| Mlkl          | 2.04 |
| Arap3         | 2.04 |
| Ctla2a        | 2.04 |
| Gypc          | 2.04 |
| Ccdc88a       | 2.04 |
| Serpinb1a     | 2.03 |
| Fam19a3       | 2.03 |
| Cdk1          | 2.03 |
| Trib1         | 2.01 |
| Gadd45b       | 2.01 |
| Pfn2          | 2.01 |
| Klrd1         | 2.01 |
| Trp53i11      | 2.01 |
| Cd22          | 2.00 |
| Mtss1         | 2.00 |
| Adam19        | 2.00 |
| Nusap1        | 2.00 |
| Hk3           | 0.50 |
| Pak1          | 0.50 |
| Irgc1         | 0.50 |
| Zfp296        | 0.50 |
| Il6st         | 0.50 |
| Oas2          | 0.49 |
| Il6ra         | 0.49 |
| Ctsf          | 0.49 |
| Lef1          | 0.49 |
| Gm4951        | 0.49 |
| Gpr133        | 0.49 |
| Olfr1033      | 0.49 |
| Bambi-ps1     | 0.48 |
| Gtf2ird1      | 0.48 |
| Dtx1          | 0.48 |
| Maml3         | 0.47 |
| Plaur         | 0.47 |
| Id3           | 0.47 |
| Tnfrsf25      | 0.47 |
| Susd4         | 0.47 |
| Wfikkn2       | 0.47 |
| 4921525O09Rik | 0.46 |
| Klra3         | 0.46 |
| 1110032F04Rik | 0.46 |
| Car12         | 0.46 |
| Pard6g        | 0.46 |

|               |      |
|---------------|------|
| Slc7a4        | 0.46 |
| Lrp12         | 0.46 |
| Spats2l       | 0.45 |
| Dleu7         | 0.45 |
| Cacna2d4      | 0.45 |
| Dst           | 0.45 |
| Osbpl6        | 0.45 |
| Tmem108       | 0.44 |
| 4930417O13Rik | 0.44 |
| Angptl2       | 0.44 |
| Adam6b        | 0.44 |
| Lrrc9         | 0.44 |
| 2310042E22Rik | 0.44 |
| Lars2         | 0.44 |
| Ankrd55       | 0.44 |
| Ly6k          | 0.43 |
| Kazn          | 0.43 |
| Dapl1         | 0.43 |
| Slc16a5       | 0.43 |
| Unc13a        | 0.42 |
| Gpr113        | 0.42 |
| Siglech       | 0.42 |
| Olig3         | 0.42 |
| Ksr2          | 0.42 |
| Card9         | 0.42 |
| Rasip1        | 0.42 |
| Dlc1          | 0.41 |
| Gm19705       | 0.41 |
| Syde2         | 0.41 |
| Actn1         | 0.41 |
| Epx           | 0.41 |
| Mir5109       | 0.41 |
| Gpr83         | 0.40 |
| Neb           | 0.40 |
| Sall2         | 0.40 |
| Fam5b         | 0.40 |
| Prickle1      | 0.40 |
| Nme4          | 0.40 |
| Lif           | 0.40 |
| Auts2         | 0.39 |
| Col6a4        | 0.39 |
| Ccdc164       | 0.39 |
| Apol11b       | 0.39 |

|               |      |
|---------------|------|
| Plac8         | 0.39 |
| Kcnf1         | 0.38 |
| Gm15708       | 0.38 |
| Wnt5b         | 0.38 |
| Plat          | 0.38 |
| Nmnat2        | 0.38 |
| 4933440M02Rik | 0.38 |
| Dcaf12l1      | 0.38 |
| Nacc2         | 0.38 |
| She           | 0.37 |
| Snord69       | 0.37 |
| Mical3        | 0.37 |
| Cox6a2        | 0.36 |
| Dmbt1         | 0.36 |
| Aldh1l1       | 0.36 |
| Scarna6       | 0.36 |
| Lrp3          | 0.35 |
| Car11         | 0.35 |
| Il1r2         | 0.35 |
| Atp6v1g3      | 0.35 |
| Clec9a        | 0.34 |
| Slc6a9        | 0.34 |
| Tnni3         | 0.34 |
| Gpr125        | 0.34 |
| Ikzf2         | 0.34 |
| Slc7a10       | 0.33 |
| Lman1l        | 0.33 |
| A430105l19Rik | 0.33 |
| Eng           | 0.32 |
| Snora17       | 0.32 |
| Gria4         | 0.32 |
| Fgfr1         | 0.32 |
| BC048644      | 0.31 |
| D830046C22Rik | 0.31 |
| Hs6st2        | 0.31 |
| Hoxa5         | 0.31 |
| Alpl          | 0.30 |
| Pgpep1l       | 0.30 |
| Adam6a        | 0.29 |
| Hoxa3         | 0.29 |
| Fam110b       | 0.28 |
| Padi1         | 0.28 |
| Serpina9      | 0.28 |

|               |      |
|---------------|------|
| Igfbp4        | 0.28 |
| Pdzk1ip1      | 0.27 |
| Fzd1          | 0.27 |
| 4930546C10Rik | 0.27 |
| Foxp3         | 0.26 |
| Hoxa6         | 0.26 |
| Hoxa7         | 0.26 |
| Edn3          | 0.26 |
| Btc           | 0.26 |
| Myl10         | 0.26 |
| Hoxa1         | 0.25 |
| Dnahc7a       | 0.24 |
| Mira          | 0.24 |
| Pcdhga10      | 0.24 |
| Lrrc3b        | 0.23 |
| Slc4a4        | 0.23 |
| Rprl3         | 0.23 |
| Shc2          | 0.22 |
| Expi          | 0.22 |
| Shisa2        | 0.22 |
| Gm12709       | 0.22 |
| Fbln2         | 0.21 |
| Sec1          | 0.21 |
| C85492        | 0.21 |
| Lamc3         | 0.21 |
| Dbx1          | 0.20 |
| Atp1b1        | 0.20 |
| Nek5          | 0.19 |
| Actg2         | 0.19 |
| Dntt          | 0.17 |
| Nrg2          | 0.17 |
| Sostdc1       | 0.14 |
| Trnp1         | 0.14 |
| Lama1         | 0.14 |
| Rprl2         | 0.13 |
| 0610012H03Rik | 0.12 |
| Lrrc32        | 0.10 |

**Supplementary Table 2. Differentially expressed genes in the skin of alopecic female C3H/HeJ mice vs. skin obtained from age-matched female C3H/HeJ mice without alopecia (n=3 per group).**

| <b>Affy_ID</b> | <b>GeneSymbol</b> | <b>FC</b> |
|----------------|-------------------|-----------|
| 1419762_at     | Ubd               | 135.60    |
| 1418652_at     | Cxcl9             | 74.98     |
| 1417898_a_at   | Gzma              | 56.37     |
| 1419697_at     | Cxcl11            | 53.33     |
| 1418930_at     | Cxcl10            | 37.58     |
| 1419042_at     | ligp1             | 34.65     |
| 1418776_at     | Gbp8              | 33.06     |
| 1418126_at     | Ccl5              | 27.95     |
| 1419043_a_at   | ligp1             | 25.36     |
| 1438676_at     | Gbp6              | 25.11     |
| 1423467_at     | Ms4a4b            | 23.27     |
| 1453196_a_at   | Oasl2             | 23.06     |
| 1419060_at     | Gzmb              | 21.74     |
| 1417141_at     | Igtp              | 21.08     |
| 1435639_at     | 2610528A11Rik     | 20.88     |
| 1423555_a_at   | lfi44             | 20.58     |
| 1417292_at     | lfi47             | 18.63     |
| 1425394_at     | BC023105          | 18.43     |
| 1420549_at     | Gbp1              | 17.81     |
| 1417793_at     | Irgm2             | 17.25     |
| 1435906_x_at   | Gbp2              | 15.15     |
| 1450033_a_at   | Stat1             | 14.48     |
| 1418825_at     | Irgm1             | 14.46     |
| 1444078_at     | Cd8a              | 14.23     |
| 1422812_at     | Cxcr6             | 13.98     |
| 1427747_a_at   | Lcn2              | 13.89     |
| 1420699_at     | Clec7a            | 13.82     |
| 1418240_at     | Gbp2              | 13.32     |
| 1450783_at     | Ifit1             | 13.13     |
| 1418392_a_at   | Gbp3              | 12.61     |
| 1424305_at     | Igj               | 12.53     |
| 1434380_at     | Gbp7              | 12.51     |
| 1424865_at     | Pyy               | 12.17     |
| 1422588_at     | Krt6b             | 12.07     |
| 1434046_at     | AA467197          | 11.98     |

|              |          |       |
|--------------|----------|-------|
| 1418580_at   | Rtp4     | 11.29 |
| 1419709_at   | Stfa3    | 11.04 |
| 1425156_at   | Gbp7     | 10.72 |
| 1449254_at   | Spp1     | 10.61 |
| 1440481_at   | Stat1    | 10.53 |
| 1449153_at   | Mmp12    | 10.18 |
| 1424921_at   | Bst2     | 9.80  |
| 1429947_a_at | Zbp1     | 9.65  |
| 1456907_at   | Cxcl9    | 9.62  |
| 1421075_s_at | Cyp7b1   | 8.74  |
| 1451777_at   | Ddx60    | 8.72  |
| 1421688_a_at | Ccl1     | 8.65  |
| 1421074_at   | Cyp7b1   | 8.56  |
| 1419604_at   | Zbp1     | 8.51  |
| 1419714_at   | Cd274    | 8.41  |
| 1427102_at   | Slfn4    | 8.40  |
| 1424761_at   | Fam115c  | 8.26  |
| 1419135_at   | Ltb      | 8.24  |
| 1450034_at   | Stat1    | 7.98  |
| 1425832_a_at | Cxcr6    | 7.98  |
| 1420915_at   | Stat1    | 7.67  |
| 1438037_at   | Herc6    | 7.62  |
| 1448436_a_at | Irf1     | 7.61  |
| 1448932_at   | Krt16    | 7.12  |
| 1435710_at   | Al661384 | 7.10  |
| 1451564_at   | Parp14   | 7.08  |
| 1452614_at   | Bcl2l15  | 7.00  |
| 1417256_at   | Mmp13    | 6.88  |
| 1447541_s_at | Itgae    | 6.79  |
| 1432026_a_at | Herc6    | 6.70  |
| 1434372_at   | AW112010 | 6.62  |
| 1459913_at   | Tnfsf10  | 6.51  |
| 1451426_at   | Dhx58    | 6.51  |
| 1452405_x_at | Trav9d-3 | 6.44  |
| 1429570_at   | Mlkl     | 6.41  |
| 1444064_at   | Samhd1   | 6.28  |
| 1451860_a_at | Trim30a  | 6.23  |
| 1453080_at   | Apol7a   | 6.22  |
| 1420380_at   | Ccl2     | 6.12  |
| 1434438_at   | Samhd1   | 6.11  |
| 1450696_at   | Psmb9    | 6.06  |
| 1451537_at   | Chi3l1   | 5.99  |
| 1450165_at   | Slfn2    | 5.88  |

|              |           |      |
|--------------|-----------|------|
| 1424727_at   | Ccr5      | 5.83 |
| 1421256_at   | Gzmc      | 5.80 |
| 1448162_at   | Vcam1     | 5.80 |
| 1453913_a_at | Tap2      | 5.79 |
| 1418191_at   | Usp18     | 5.73 |
| 1425005_at   | Klrc1     | 5.65 |
| 1439680_at   | Tnfsf10   | 5.64 |
| 1433935_at   | AU020206  | 5.51 |
| 1426113_x_at | Trav9d-3  | 5.51 |
| 1422415_at   | Ang2      | 5.44 |
| 1460245_at   | Klrd1     | 5.41 |
| 1426971_at   | Uba7      | 5.34 |
| 1443698_at   | Xaf1      | 5.32 |
| 1418131_at   | Samhd1    | 5.26 |
| 1419591_at   | Gsdmc     | 5.20 |
| 1416897_at   | Parp9     | 5.11 |
| 1417244_a_at | Irf7      | 5.08 |
| 1449216_at   | Ilgae     | 5.06 |
| 1448632_at   | Psmb10    | 5.06 |
| 1439825_at   | Dtx3l     | 5.02 |
| 1416714_at   | Irf8      | 5.00 |
| 1425917_at   | H28       | 4.99 |
| 1447621_s_at | Tmem173   | 4.93 |
| 1425396_a_at | Lck       | 4.88 |
| 1418536_at   | H2-Q7     | 4.84 |
| 1449025_at   | Ifit3     | 4.75 |
| 1436649_at   | Ikzf3     | 4.75 |
| 1425947_at   | Ipng      | 4.71 |
| 1417172_at   | Ube2l6    | 4.70 |
| 1438855_x_at | Tnfaip2   | 4.70 |
| 1422962_a_at | Psmb8     | 4.69 |
| 1421186_at   | Ccr2      | 4.66 |
| 1418204_s_at | Aif1      | 4.61 |
| 1421911_at   | Stat2     | 4.57 |
| 1450753_at   | Nkg7      | 4.55 |
| 1450424_a_at | Il18bp    | 4.53 |
| 1450403_at   | Stat2     | 4.52 |
| 1452565_x_at | LOC641050 | 4.44 |
| 1441054_at   | Apol8     | 4.43 |
| 1449328_at   | Ly75      | 4.39 |
| 1422601_at   | Serpinb9  | 4.39 |
| 1422177_at   | Il13ra2   | 4.39 |
| 1426170_a_at | Cd8b1     | 4.38 |



|              |               |      |
|--------------|---------------|------|
| 1460603_at   | Samd9l        | 4.37 |
| 1448754_at   | Rbp1          | 4.31 |
| 1417822_at   | D17H6S56E-5   | 4.28 |
| 1435208_at   | Dtx3l         | 4.26 |
| 1418649_at   | Egln3         | 4.26 |
| 1422160_at   | H2-T24        | 4.23 |
| 1456064_at   | AI504432      | 4.21 |
| 1449184_at   | Pglyrp1       | 4.19 |
| 1438498_at   | Zmynd15       | 4.19 |
| 1449195_s_at | Cxcl16        | 4.11 |
| 1439034_at   | Spn           | 4.10 |
| 1450678_at   | Itgb2         | 4.10 |
| 1437176_at   | Nlrc5         | 4.09 |
| 1458299_s_at | Nfkbie        | 4.07 |
| 1421262_at   | Lipg          | 4.06 |
| 1426039_a_at | Alox12e       | 4.05 |
| 1429184_at   | Gvin1         | 4.05 |
| 1448380_at   | Lgals3bp      | 4.04 |
| 1436576_at   | Fam26f        | 4.01 |
| 1453939_x_at | Gm9706        | 3.99 |
| 1434457_at   | Sp100         | 3.98 |
| 1425295_at   | Ear11         | 3.97 |
| 1425065_at   | Oas2          | 3.97 |
| 1449846_at   | Ear2          | 3.97 |
| 1450582_at   | H2-Q5         | 3.96 |
| 1440926_at   | Flt1          | 3.94 |
| 1457140_s_at | Rassf10       | 3.91 |
| 1455500_at   | Rnf213        | 3.90 |
| 1426970_a_at | Uba7          | 3.89 |
| 1448452_at   | Irf8          | 3.88 |
| 1451673_at   | Cd8a          | 3.88 |
| 1437929_at   | Dact2         | 3.86 |
| 1426774_at   | Parp12        | 3.84 |
| 1418648_at   | Egln3         | 3.82 |
| 1437811_x_at | Cotl1         | 3.78 |
| 1428420_a_at | 1200009I06Rik | 3.78 |
| 1417961_a_at | Trim30a       | 3.77 |
| 1425225_at   | Fcgr4         | 3.74 |
| 1421812_at   | Tapbp         | 3.74 |
| 1451905_a_at | Mx1           | 3.72 |
| 1441752_at   | Art3          | 3.69 |
| 1448301_s_at | Serpinb1a     | 3.69 |
| 1436172_at   | Gm20559       | 3.68 |

|              |             |      |
|--------------|-------------|------|
| 1418133_at   | Bcl3        | 3.67 |
| 1418655_at   | B4galnt1    | 3.66 |
| 1417821_at   | D17H6S56E-5 | 3.66 |
| 1417171_at   | Itk         | 3.63 |
| 1460227_at   | Timp1       | 3.61 |
| 1455161_at   | AI504432    | 3.61 |
| 1421228_at   | Ccl7        | 3.60 |
| 1434905_at   | Ndufa4l2    | 3.60 |
| 1460218_at   | Cd52        | 3.60 |
| 1460437_at   | Cyth4       | 3.54 |
| 1430005_a_at | Batf2       | 3.53 |
| 1450188_s_at | Lipg        | 3.53 |
| 1419698_at   | Cxcl11      | 3.52 |
| 1439790_at   | Serpinb9    | 3.51 |
| 1419413_at   | Ccl17       | 3.51 |
| 1421009_at   | Rsad2       | 3.50 |
| 1436838_x_at | Cotl1       | 3.50 |
| 1455269_a_at | Coro1a      | 3.50 |
| 1422828_at   | Cd3d        | 3.49 |
| 1440866_at   | Eif2ak2     | 3.47 |
| 1420437_at   | Ido1        | 3.45 |
| 1439814_at   | Atp8b4      | 3.44 |
| 1441706_at   | Dscaml1     | 3.44 |
| 1421322_a_at | Irf9        | 3.43 |
| 1427076_at   | Mpeg1       | 3.43 |
| 1435454_a_at | BC006779    | 3.41 |
| 1444619_x_at | Psmb8       | 3.40 |
| 1444350_at   | Slfn10-ps   | 3.39 |
| 1425335_at   | Cd8a        | 3.38 |
| 1450484_a_at | Cmpk2       | 3.38 |
| 1435832_at   | Lrrc4       | 3.38 |
| 1424067_at   | Icam1       | 3.37 |
| 1416318_at   | Serpinb1a   | 3.37 |
| 1445897_s_at | Ifi35       | 3.35 |
| 1450291_s_at | Ms4a4c      | 3.34 |
| 1416273_at   | Tnfaip2     | 3.34 |
| 1453304_s_at | Ly6e        | 3.33 |
| 1418770_at   | Cd2         | 3.32 |
| 1434067_at   | AI662270    | 3.32 |
| 1428735_at   | Cd69        | 3.31 |
| 1424965_at   | Lpxn        | 3.31 |
| 1455393_at   | Cp          | 3.31 |
| 1429567_at   | Rassf10     | 3.30 |

|              |               |      |
|--------------|---------------|------|
| 1436905_x_at | Laptm5        | 3.30 |
| 1428485_at   | Car12         | 3.28 |
| 1456211_at   | Nlrp10        | 3.28 |
| 1438531_at   | A730054J21Rik | 3.26 |
| 1449175_at   | Gpr65         | 3.25 |
| 1424923_at   | Serpina3g     | 3.24 |
| 1417995_at   | Ptpn22        | 3.23 |
| 1440990_at   | Kif26b        | 3.20 |
| 1420338_at   | Alox15        | 3.18 |
| 1419300_at   | Flt1          | 3.17 |
| 1419128_at   | Itgax         | 3.16 |
| 1426872_at   | Fcgbp         | 3.15 |
| 1425336_x_at | H2-K1         | 3.15 |
| 1448759_at   | Il2rb         | 3.14 |
| 1419178_at   | Cd3g          | 3.11 |
| 1420412_at   | Tnfsf10       | 3.11 |
| 1433465_a_at | AI467606      | 3.11 |
| 1418203_at   | Pmaip1        | 3.11 |
| 1430208_at   | Krt42         | 3.09 |
| 1421628_at   | Il18r1        | 3.08 |
| 1417620_at   | Rac2          | 3.08 |
| 1454850_at   | Tbc1d10c      | 3.07 |
| 1439221_s_at | Cd40          | 3.07 |
| 1438658_a_at | S1pr3         | 3.06 |
| 1426278_at   | Ifi27l2a      | 3.06 |
| 1429692_s_at | Gch1          | 3.04 |
| 1458148_at   | Nlrc3         | 3.03 |
| 1440927_x_at | Apol11b       | 3.03 |
| 1436236_x_at | Cotl1         | 3.03 |
| 1448940_at   | Trim21        | 3.02 |
| 1421217_a_at | Lgals9        | 3.02 |
| 1451756_at   | Flt1          | 3.01 |
| 1455048_at   | Igsf3         | 3.01 |
| 1435560_at   | Itgal         | 3.01 |
| 1425719_a_at | Nmi           | 2.99 |
| 1439956_at   | Ms4a6b        | 2.98 |
| 1436562_at   | Ddx58         | 2.98 |
| 1422632_at   | Ctsw          | 2.98 |
| 1436472_at   | Slfn9         | 2.98 |
| 1427013_at   | Car9          | 2.98 |
| 1449361_at   | Tbx21         | 2.98 |
| 1426025_s_at | Laptm5        | 2.97 |
| 1438052_at   | A130071D04Rik | 2.97 |

|              |               |      |
|--------------|---------------|------|
| 1426276_at   | Ifih1         | 2.97 |
| 1456890_at   | Ddx58         | 2.96 |
| 1416295_a_at | Il2rg         | 2.94 |
| 1434873_a_at | Acap1         | 2.93 |
| 1456103_at   | Pml           | 2.93 |
| 1418678_at   | Has2          | 2.92 |
| 1420697_at   | Slc15a3       | 2.91 |
| 1436058_at   | Rsad2         | 2.90 |
| 1425294_at   | Slamf8        | 2.90 |
| 1459151_x_at | Ifi35         | 2.90 |
| 1418991_at   | Bak1          | 2.89 |
| 1439068_at   | Erap1         | 2.89 |
| 1424617_at   | Ifi35         | 2.89 |
| 1417189_at   | Psme2         | 2.89 |
| 1451544_at   | Tapbpl        | 2.88 |
| 1419412_at   | Xcl1          | 2.88 |
| 1419539_at   | Irx4          | 2.88 |
| 1452592_at   | Mgst2         | 2.87 |
| 1420774_a_at | 4930583H14Rik | 2.86 |
| 1440169_x_at | Ifnar2        | 2.86 |
| 1420499_at   | Gch1          | 2.85 |
| 1416002_x_at | Cotl1         | 2.85 |
| 1423754_at   | Ifitm3        | 2.84 |
| 1416942_at   | Erap1         | 2.84 |
| 1449169_at   | Has2          | 2.83 |
| 1419609_at   | Ccr1          | 2.83 |
| 1449591_at   | Casp4         | 2.81 |
| 1436598_at   | Icos          | 2.81 |
| 1427381_at   | Irg1          | 2.81 |
| 1419879_s_at | Trim25        | 2.81 |
| 1449143_at   | Rtp4          | 2.80 |
| 1449839_at   | Casp3         | 2.78 |
| 1426599_a_at | Slc2a1        | 2.78 |
| 1452117_a_at | Fyb           | 2.77 |
| 1434773_a_at | Slc2a1        | 2.77 |
| 1450378_at   | Tapbp         | 2.76 |
| 1419561_at   | Ccl3          | 2.76 |
| 1427007_at   | Sash3         | 2.76 |
| 1422706_at   | Pmepa1        | 2.76 |
| 1427892_at   | Myo1g         | 2.75 |
| 1451335_at   | Plac8         | 2.73 |
| 1425974_a_at | Trim25        | 2.72 |
| 1426600_at   | Slc2a1        | 2.67 |

|              |               |      |
|--------------|---------------|------|
| 1418826_at   | Ms4a6b        | 2.67 |
| 1430244_at   | 4921509J17Rik | 2.66 |
| 1457664_x_at | C2            | 2.65 |
| 1416564_at   | Sox7          | 2.65 |
| 1433466_at   | AI467606      | 2.65 |
| 1425801_x_at | Cotl1         | 2.64 |
| 1435945_a_at | Kcnn4         | 2.63 |
| 1434268_at   | Adar          | 2.63 |
| 1420353_at   | Lta           | 2.63 |
| 1418741_at   | Itgb7         | 2.62 |
| 1416246_a_at | Coro1a        | 2.62 |
| 1422280_at   | Gzmk          | 2.61 |
| 1421596_s_at | H28           | 2.60 |
| 1415834_at   | Dusp6         | 2.60 |
| 1438364_x_at | Ang4          | 2.60 |
| 1439819_at   | AU015263      | 2.60 |
| 1451755_a_at | Apoec1        | 2.59 |
| 1416296_at   | Il2rg         | 2.59 |
| 1439276_at   | Adar          | 2.59 |
| 1417495_x_at | Cp            | 2.59 |
| 1453352_at   | Atp10b        | 2.58 |
| 1437478_s_at | Efhd2         | 2.58 |
| 1434366_x_at | C1qb          | 2.58 |
| 1417185_at   | Ly6a          | 2.58 |
| 1443858_at   | Trim12c       | 2.58 |
| 1417494_a_at | Cp            | 2.58 |
| 1427746_x_at | H2-K1         | 2.57 |
| 1421034_a_at | Il4ra         | 2.56 |
| 1422005_at   | Eif2ak2       | 2.56 |
| 1455000_at   | Gpr68         | 2.56 |
| 1415803_at   | Cx3cl1        | 2.55 |
| 1422782_s_at | Tlr3          | 2.55 |
| 1416097_at   | Lrrc4         | 2.54 |
| 1460651_at   | Lat           | 2.53 |
| 1427325_s_at | Akna          | 2.53 |
| 1425603_at   | Tmem176a      | 2.49 |
| 1439595_at   | Tcra          | 2.49 |
| 1424041_s_at | C1s           | 2.49 |
| 1418718_at   | Cxcl16        | 2.48 |
| 1456061_at   | Gimap8        | 2.47 |
| 1417056_at   | Psme1         | 2.46 |
| 1418981_at   | Casp12        | 2.46 |
| 1421211_a_at | Ciita         | 2.46 |

|              |               |      |
|--------------|---------------|------|
| 1449235_at   | Fasl          | 2.45 |
| 1449265_at   | Casp1         | 2.44 |
| 1424383_at   | Tmem51        | 2.44 |
| 1425405_a_at | Adar          | 2.43 |
| 1425902_a_at | Nfkb2         | 2.42 |
| 1452817_at   | Smyd3         | 2.42 |
| 1416871_at   | Adam8         | 2.42 |
| 1457917_at   | Lck           | 2.42 |
| 1449127_at   | Selplg        | 2.42 |
| 1416514_a_at | Fscn1         | 2.42 |
| 1439773_at   | Ly6e          | 2.41 |
| 1436223_at   | Itgb8         | 2.41 |
| 1454268_a_at | Cyba          | 2.41 |
| 1451821_a_at | Sp100         | 2.41 |
| 1444242_at   | Slco2a1       | 2.40 |
| 1415983_at   | Lcp1          | 2.40 |
| 1418293_at   | Ifit2         | 2.39 |
| 1420671_x_at | Ms4a4c        | 2.39 |
| 1450534_x_at | H2-K1         | 2.39 |
| 1418077_at   | Trim21        | 2.39 |
| 1417496_at   | Cp            | 2.38 |
| 1435415_x_at | Marcksl1      | 2.37 |
| 1451320_at   | Arhgap8       | 2.37 |
| 1427041_at   | BC013712      | 2.36 |
| 1422139_at   | Plau          | 2.36 |
| 1441768_at   | 9430051021Rik | 2.35 |
| 1449455_at   | Hck           | 2.35 |
| 1421358_at   | H2-M3         | 2.34 |
| 1436312_at   | Ikzf1         | 2.34 |
| 1444632_at   | BC064078      | 2.33 |
| 1450791_at   | Nppb          | 2.33 |
| 1424927_at   | Glipr1        | 2.33 |
| 1419764_at   | Chi3l3        | 2.33 |
| 1426093_at   | Trim34a       | 2.33 |
| 1420515_a_at | Pglyrp2       | 2.33 |
| 1448061_at   | Msr1          | 2.33 |
| 1418641_at   | Lcp2          | 2.32 |
| 1418842_at   | Hcls1         | 2.31 |
| 1434400_at   | Tgif2         | 2.31 |
| 1439494_at   | Slc5a9        | 2.30 |
| 1448757_at   | Pml           | 2.28 |
| 1431339_a_at | Efhd2         | 2.28 |
| 1455581_x_at | Gm20559       | 2.28 |

|              |               |      |
|--------------|---------------|------|
| 1437132_x_at | Nedd9         | 2.27 |
| 1456307_s_at | Adcy7         | 2.27 |
| 1422932_a_at | Vav1          | 2.27 |
| 1450446_a_at | Socs1         | 2.27 |
| 1434068_s_at | Al662270      | 2.26 |
| 1416069_at   | Pfkp          | 2.26 |
| 1421210_at   | Ciita         | 2.26 |
| 1437785_at   | Adamts9       | 2.25 |
| 1436230_at   | Gpr114        | 2.25 |
| 1425119_at   | Oas1b         | 2.25 |
| 1449310_at   | Ptger2        | 2.25 |
| 1440721_at   | 5930433N17Rik | 2.25 |
| 1430352_at   | Adamts9       | 2.25 |
| 1456377_x_at | Limd2         | 2.25 |
| 1449991_at   | Cd244         | 2.25 |
| 1416051_at   | C2            | 2.25 |
| 1455132_at   | Rasal3        | 2.24 |
| 1422124_a_at | Ptprc         | 2.24 |
| 1448576_at   | Il7r          | 2.23 |
| 1421931_at   | Icos          | 2.22 |
| 1436199_at   | Trim14        | 2.21 |
| 1446509_at   | Smox          | 2.20 |
| 1430148_at   | Rab19         | 2.20 |
| 1450170_x_at | H2-D1         | 2.19 |
| 1439736_at   | 5830453J16Rik | 2.19 |
| 1451567_a_at | lfi203        | 2.19 |
| 1433920_at   | Sema4c        | 2.18 |
| 1420913_at   | Slco2a1       | 2.18 |
| 1439148_a_at | Pfkl          | 2.18 |
| 1452544_x_at | H2-D1         | 2.18 |
| 1441600_at   | C920021A13    | 2.17 |
| 1422804_at   | Serpinb6b     | 2.16 |
| 1453228_at   | Stx11         | 2.15 |
| 1427682_a_at | Egr2          | 2.15 |
| 1428378_at   | Zc3hav1       | 2.15 |
| 1430165_at   | Stk17b        | 2.15 |
| 1451321_a_at | Rbm43         | 2.15 |
| 1457780_at   | Stx11         | 2.15 |
| 1439764_s_at | Igf2bp2       | 2.14 |
| 1435913_at   | B4galnt4      | 2.14 |
| 1449220_at   | Gimap3        | 2.13 |
| 1456251_x_at | Tspo          | 2.13 |
| 1422781_at   | Tlr3          | 2.13 |

|              |          |      |
|--------------|----------|------|
| 1423135_at   | Thy1     | 2.13 |
| 1424375_s_at | Gimap4   | 2.12 |
| 1428660_s_at | Tor3a    | 2.12 |
| 1439012_a_at | Dck      | 2.12 |
| 1441912_x_at | C2       | 2.12 |
| 1424704_at   | Runx2    | 2.11 |
| 1424953_at   | BC021614 | 2.11 |
| 1431843_a_at | Nfkbie   | 2.10 |
| 1417219_s_at | Tmsb10   | 2.10 |
| 1448160_at   | Lcp1     | 2.10 |
| 1427352_at   | Krt79    | 2.10 |
| 1419194_s_at | Gmfg     | 2.09 |
| 1460675_at   | Igsf8    | 2.09 |
| 1426568_at   | Slc2a9   | 2.08 |
| 1424961_at   | Tapbpl   | 2.08 |
| 1418099_at   | Tnfrsf1b | 2.08 |
| 1422527_at   | H2-DMa   | 2.08 |
| 1426554_a_at | Pgam1    | 2.08 |
| 1438941_x_at | Ampd2    | 2.08 |
| 1450648_s_at | H2-Ab1   | 2.07 |
| 1440165_at   | Ptprc    | 2.07 |
| 1437724_x_at | Pitpnm1  | 2.07 |
| 1434364_at   | Map3k14  | 2.06 |
| 1419537_at   | Tfec     | 2.06 |
| 1425728_at   | Gm12185  | 2.06 |
| 1455966_s_at | Nudt21   | 2.05 |
| 1419282_at   | Ccl12    | 2.05 |
| 1420404_at   | Cd86     | 2.05 |
| 1415765_at   | Hnrnpul2 | 2.05 |
| 1422511_a_at | Ogfr     | 2.05 |
| 1425548_a_at | Lst1     | 2.05 |
| 1427683_at   | Egr2     | 2.05 |
| 1453757_at   | Herc6    | 2.04 |
| 1435331_at   | Pyhin1   | 2.04 |
| 1419119_at   | Hcst     | 2.03 |
| 1458229_at   | Robo2    | 2.03 |
| 1422808_s_at | Dock2    | 2.03 |
| 1437213_at   | Nudt21   | 2.02 |
| 1429831_at   | Pik3ap1  | 2.01 |
| 1439808_at   | Ipcef1   | 2.01 |
| 1428891_at   | Parm1    | 2.01 |
| 1427765_a_at | Tcrb-J   | 2.01 |
| 1426133_a_at | Mitd1    | 2.00 |



|              |               |      |
|--------------|---------------|------|
| 1425016_at   | Ephb2         | 2.00 |
| 1422562_at   | Rrad          | 2.00 |
| 1418110_a_at | Inpp5d        | 2.00 |
| 1420272_at   | Samhd1        | 2.00 |
| 1417928_at   | Pdlim4        | 2.00 |
| 1460220_a_at | Csf1          | 2.00 |
| 1451828_a_at | Acsl4         | 2.00 |
| 1435672_at   | 3830612M24    | 1.99 |
| 1453181_x_at | Plscr1        | 1.99 |
| 1428767_at   | Gsdmd         | 1.99 |
| 1436861_at   | Il7           | 1.99 |
| 1437270_a_at | Clcf1         | 1.99 |
| 1419202_at   | Cst7          | 1.98 |
| 1435529_at   | Gm14446       | 1.98 |
| 1419810_x_at | Arhgap9       | 1.98 |
| 1429525_s_at | Myo1f         | 1.98 |
| 1437308_s_at | F2r           | 1.98 |
| 1419676_at   | Mx2           | 1.98 |
| 1455019_x_at | Ckap4         | 1.98 |
| 1438948_x_at | Tspo          | 1.97 |
| 1448618_at   | Mvp           | 1.97 |
| 1436365_at   | Zbtb7c        | 1.97 |
| 1418464_at   | Matn4         | 1.97 |
| 1439093_at   | Hspa4l        | 1.97 |
| 1435193_at   | A230050P20Rik | 1.97 |
| 1439065_x_at | Gm13152       | 1.97 |
| 1423306_at   | 2010002N04Rik | 1.97 |
| 1430658_a_at | Gsdma2        | 1.97 |
| 1419469_at   | Gnb4          | 1.96 |
| 1426725_s_at | Ets1          | 1.96 |
| 1417288_at   | Plekha2       | 1.96 |
| 1456586_x_at | Mvp           | 1.96 |
| 1426415_a_at | Trim25        | 1.95 |
| 1437249_at   | Skap1         | 1.95 |
| 1433517_at   | Myeov2        | 1.95 |
| 1425374_at   | Oas3          | 1.95 |
| 1425681_a_at | Prnd          | 1.95 |
| 1436659_at   | Dclk1         | 1.94 |
| 1446326_at   | Col1a2        | 1.94 |
| 1435596_at   | Pion          | 1.94 |
| 1416492_at   | Ccne1         | 1.94 |
| 1422701_at   | Zap70         | 1.93 |
| 1435517_x_at | Ralb          | 1.93 |

|              |               |      |
|--------------|---------------|------|
| 1436902_x_at | Tmsb10        | 1.93 |
| 1425166_at   | Rbl1          | 1.93 |
| 1421207_at   | Lif           | 1.93 |
| 1460134_at   | 9330175E14Rik | 1.93 |
| 1420273_x_at | Samhd1        | 1.93 |
| 1443621_at   | Xaf1          | 1.92 |
| 1425078_x_at | C130026I21Rik | 1.92 |
| 1427994_at   | Cd300lf       | 1.91 |
| 1456545_at   | Il18rap       | 1.91 |
| 1418346_at   | Insl6         | 1.91 |
| 1428372_at   | St5           | 1.91 |
| 1417045_at   | Bid           | 1.91 |
| 1433699_at   | Tnfaip3       | 1.91 |
| 1440275_at   | Runx3         | 1.91 |
| 1460253_at   | Cmtm7         | 1.91 |
| 1421188_at   | Ccr2          | 1.90 |
| 1427911_at   | Tmem173       | 1.90 |
| 1420653_at   | Tgfb1         | 1.90 |
| 1437643_at   | Cenpj         | 1.90 |
| 1443687_x_at | H2-DMb2       | 1.90 |
| 1440299_at   | E330016A19Rik | 1.90 |
| 1425151_a_at | Noxo1         | 1.90 |
| 1441097_at   | Vangl1        | 1.90 |
| 1449988_at   | Gimap1        | 1.89 |
| 1427404_x_at | Gm5506        | 1.89 |
| 1425617_at   | Dhx9          | 1.88 |
| 1426926_at   | Plcg2         | 1.88 |
| 1424037_at   | Itпка         | 1.88 |
| 1449925_at   | Cxcr3         | 1.88 |
| 1435394_s_at | Rhoc          | 1.87 |
| 1453392_at   | Ttc39b        | 1.87 |
| 1449473_s_at | Cd40          | 1.87 |
| 1419186_a_at | St8sia4       | 1.86 |
| 1455898_x_at | Slc2a3        | 1.86 |
| 1430447_a_at | Lair1         | 1.86 |
| 1418353_at   | Cd5           | 1.85 |
| 1449425_at   | Wnt2          | 1.85 |
| 1439114_at   | Ddx60         | 1.85 |
| 1425084_at   | Gimap7        | 1.85 |
| 1425819_at   | Zbtb7c        | 1.85 |
| 1416001_a_at | Cotl1         | 1.84 |
| 1422704_at   | Gyk           | 1.84 |
| 1445452_at   | Traf1         | 1.84 |

|              |               |      |
|--------------|---------------|------|
| 1438852_x_at | Mcm6          | 1.84 |
| 1436423_at   | Themis        | 1.84 |
| 1417599_at   | Cd276         | 1.84 |
| 1421930_at   | Icos          | 1.84 |
| 1421814_at   | Msn           | 1.83 |
| 1419132_at   | Tlr2          | 1.83 |
| 1448568_a_at | Slc20a1       | 1.83 |
| 1423602_at   | Traf1         | 1.83 |
| 1451931_x_at | H2-L          | 1.82 |
| 1456836_at   | Itk           | 1.82 |
| 1453129_a_at | Rgs12         | 1.82 |
| 1426454_at   | Arhgdib       | 1.82 |
| 1451385_at   | Fam162a       | 1.82 |
| 1419470_at   | Gnb4          | 1.82 |
| 1435697_a_at | Cytip         | 1.82 |
| 1424214_at   | Parm1         | 1.81 |
| 1458524_at   | Fndc3a        | 1.81 |
| 1455051_at   | Rnf31         | 1.81 |
| 1452163_at   | Ets1          | 1.81 |
| 1448328_at   | Sh3bp2        | 1.80 |
| 1456700_x_at | Marcks        | 1.80 |
| 1451784_x_at | H2-D1         | 1.80 |
| 1437606_at   | Btbd19        | 1.80 |
| 1439476_at   | Dsg2          | 1.80 |
| 1440878_at   | Runx1         | 1.79 |
| 1453472_a_at | Slamf7        | 1.79 |
| 1434653_at   | Ptk2b         | 1.79 |
| 1436708_x_at | Mcm4          | 1.79 |
| 1454592_at   | 9430012M22Rik | 1.79 |
| 1433954_at   | 4632419I22Rik | 1.78 |
| 1426315_a_at | 6330416G13Rik | 1.78 |
| 1451289_at   | Dclk1         | 1.78 |
| 1443686_at   | H2-DMb2       | 1.78 |
| 1449903_at   | Crtam         | 1.78 |
| 1418090_at   | Plvap         | 1.78 |
| 1460250_at   | Sostdc1       | 1.77 |
| 1435749_at   | Gda           | 1.77 |
| 1450269_a_at | Pfkl          | 1.77 |
| 1438910_a_at | Stom          | 1.77 |
| 1437868_at   | Fam46a        | 1.77 |
| 1448449_at   | Ripk3         | 1.77 |
| 1424496_at   | 5133401N09Rik | 1.77 |
| 1438854_x_at | Pitpnm1       | 1.77 |

|              |               |      |
|--------------|---------------|------|
| 1424930_s_at | Fam83f        | 1.77 |
| 1460378_a_at | Tes           | 1.77 |
| 1448914_a_at | Csf1          | 1.76 |
| 1448659_at   | Casp7         | 1.76 |
| 1427689_a_at | Tnip1         | 1.76 |
| 1428242_at   | Hmha1         | 1.76 |
| 1455975_x_at | Rnf114        | 1.76 |
| 1453076_at   | Batf3         | 1.76 |
| 1419125_at   | Ptpn18        | 1.76 |
| 1424524_at   | Dram1         | 1.76 |
| 1453202_at   | E330016A19Rik | 1.76 |
| 1428346_at   | Trafd1        | 1.76 |
| 1451987_at   | Arrb2         | 1.76 |
| 1417790_at   | Dok1          | 1.76 |
| 1418244_at   | Naa20         | 1.75 |
| 1416226_at   | Arpc1b        | 1.75 |
| 1438634_x_at | Lasp1         | 1.75 |
| 1419209_at   | Cxcl1         | 1.75 |
| 1451363_a_at | Dennd2d       | 1.75 |
| 1430622_at   | 4833423F13Rik | 1.74 |
| 1447788_s_at | Tspyl3        | 1.74 |
| 1456310_a_at | 2610002J02Rik | 1.74 |
| 1455251_at   | Itga1         | 1.74 |
| 1416750_at   | Sigmar1       | 1.74 |
| 1421830_at   | Ak4           | 1.74 |
| 1417346_at   | Pycard        | 1.74 |
| 1436958_x_at | Tpm3          | 1.74 |
| 1434069_at   | Prex1         | 1.74 |
| 1440249_at   | Aknad1        | 1.74 |
| 1442849_at   | Lrp1          | 1.74 |
| 1451174_at   | Lrrc33        | 1.73 |
| 1451411_at   | Gprc5b        | 1.73 |
| 1460469_at   | Tnfrsf9       | 1.73 |
| 1452661_at   | Tfrc          | 1.73 |
| 1430534_at   | Rnase6        | 1.73 |
| 1456028_x_at | Marcks        | 1.73 |
| 1448731_at   | Il10ra        | 1.73 |
| 1418257_at   | Slc12a7       | 1.73 |
| 1420170_at   | Myh9          | 1.72 |
| 1424032_at   | Hvcn1         | 1.72 |
| 1435748_at   | Gda           | 1.72 |
| 1451285_at   | Fus           | 1.72 |
| 1454607_s_at | Psat1         | 1.72 |

|              |               |      |
|--------------|---------------|------|
| 1434089_at   | Synpo         | 1.71 |
| 1421525_a_at | Naip5         | 1.71 |
| 1458415_at   | Clec2e        | 1.71 |
| 1419721_at   | Niacr1        | 1.71 |
| 1453328_at   | 2700008G24Rik | 1.71 |
| 1435337_at   | Tshz3         | 1.71 |
| 1456011_x_at | Acaa1a        | 1.71 |
| 1423986_a_at | Shisa5        | 1.71 |
| 1427386_at   | Arhgef16      | 1.70 |
| 1443123_at   | Tanc2         | 1.70 |
| 1418674_at   | Osmr          | 1.70 |
| 1445588_at   | Ankrd44       | 1.70 |
| 1424552_at   | Casp8         | 1.70 |
| 1439261_x_at | Mitd1         | 1.70 |
| 1452428_a_at | B2m           | 1.70 |
| 1418045_at   | Inpp1         | 1.70 |
| 1441317_x_at | Jakmip1       | 1.70 |
| 1436589_x_at | Prkd2         | 1.70 |
| 1437503_a_at | Shisa5        | 1.70 |
| 1421578_at   | Ccl4          | 1.70 |
| 1435227_at   | Bcl11b        | 1.70 |
| 1436177_at   | Plekha2       | 1.70 |
| 1457644_s_at | Cxcl1         | 1.70 |
| 1429527_a_at | Plscr1        | 1.70 |
| 1433531_at   | Acsl4         | 1.69 |
| 1420731_a_at | Csrp2         | 1.69 |
| 1438097_at   | Rab20         | 1.69 |
| 1426239_s_at | Arrb2         | 1.69 |
| 1427182_s_at | D18Ertd653e   | 1.69 |
| 1435338_at   | Cdk6          | 1.69 |
| 1433885_at   | Iqgap2        | 1.69 |
| 1450852_s_at | F2r           | 1.69 |
| 1446507_at   | Kif24         | 1.69 |
| 1450456_at   | Il21r         | 1.69 |
| 1418612_at   | Slfn1         | 1.68 |
| 1438974_x_at | Pitpnm1       | 1.68 |
| 1439030_at   | Gmppb         | 1.68 |
| 1416619_at   | 4632428N05Rik | 1.68 |
| 1441880_x_at | Tmem149       | 1.68 |
| 1448797_at   | Elk3          | 1.68 |
| 1443794_x_at | Noc4l         | 1.68 |
| 1452289_a_at | Rnf135        | 1.68 |
| 1450918_s_at | Src           | 1.67 |

|              |               |      |
|--------------|---------------|------|
| 1420955_at   | Vsnl1         | 1.67 |
| 1418751_at   | Sit1          | 1.67 |
| 1447568_at   | Gatc          | 1.67 |
| 1460700_at   | Stat3         | 1.67 |
| 1419911_at   | Coro1c        | 1.66 |
| 1452966_at   | Bcl11b        | 1.66 |
| 1421550_a_at | Trim34a       | 1.66 |
| 1423686_a_at | Prr13         | 1.66 |
| 1455287_at   | Cdk6          | 1.66 |
| 1439422_a_at | Fam132a       | 1.66 |
| 1416935_at   | Trpv2         | 1.66 |
| 1436183_at   | Zc3hav1       | 1.66 |
| 1451314_a_at | Vcam1         | 1.66 |
| 1417300_at   | Smpdl3b       | 1.66 |
| 1419097_a_at | Stom          | 1.66 |
| 1446939_at   | Trim12a       | 1.65 |
| 1423411_at   | Rbm47         | 1.65 |
| 1450355_a_at | Capg          | 1.65 |
| 1436220_at   | Zfp287        | 1.65 |
| 1429742_at   | Rcbtb2        | 1.65 |
| 1455221_at   | Abcg1         | 1.65 |
| 1438934_x_at | Sema4a        | 1.65 |
| 1452836_at   | Lpin2         | 1.65 |
| 1427874_at   | Rnf114        | 1.64 |
| 1452425_at   | Tnfrsf14      | 1.64 |
| 1422303_a_at | Tnfrsf18      | 1.64 |
| 1418396_at   | Gpsm3         | 1.64 |
| 1451462_a_at | Ifnar2        | 1.64 |
| 1447711_x_at | 4933412E12Rik | 1.64 |
| 1454757_s_at | Ifi271l1      | 1.64 |
| 1424246_a_at | Tes           | 1.64 |
| 1459872_x_at | H2-DMA        | 1.64 |
| 1424304_at   | Tpcn2         | 1.64 |
| 1416695_at   | Tspo          | 1.64 |
| 1451475_at   | Plxnd1        | 1.64 |
| 1428727_at   | Cep192        | 1.64 |
| 1440779_s_at | Slc5a9        | 1.63 |
| 1433451_at   | Cdk5r1        | 1.63 |
| 1450531_at   | H2-BI         | 1.63 |
| 1458601_at   | 8030447M02Rik | 1.63 |
| 1426739_at   | Donson        | 1.63 |
| 1423350_at   | Socs5         | 1.63 |
| 1456467_s_at | Nlk           | 1.63 |

|              |               |      |
|--------------|---------------|------|
| 1447803_x_at | Capg          | 1.63 |
| 1453201_at   | Rassf10       | 1.63 |
| 1438148_at   | Cxcl3         | 1.63 |
| 1444197_at   | Rinl          | 1.63 |
| 1428859_at   | Paox          | 1.63 |
| 1455656_at   | Btla          | 1.63 |
| 1455080_at   | Ppp1r16b      | 1.63 |
| 1424857_a_at | Trim34a       | 1.62 |
| 1450140_a_at | Cdkn2a        | 1.62 |
| 1438095_x_at | Noc4l         | 1.62 |
| 1460231_at   | Irf5          | 1.62 |
| 1426318_at   | Serpinb1b     | 1.62 |
| 1427348_at   | Zc3h12a       | 1.62 |
| 1451862_a_at | Prf1          | 1.62 |
| 1442944_at   | C76555        | 1.62 |
| 1420635_a_at | Tcirg1        | 1.62 |
| 1435143_at   | Elk3          | 1.62 |
| 1449623_at   | Txnrd3        | 1.61 |
| 1458345_s_at | Colec11       | 1.61 |
| 1423812_s_at | Vopp1         | 1.61 |
| 1417561_at   | Apoc1         | 1.61 |
| 1455818_at   | 4930427A07Rik | 1.60 |
| 1426757_at   | Ampd2         | 1.60 |
| 1418265_s_at | Irf2          | 1.60 |
| 1434185_at   | Acaca         | 1.60 |
| 1437327_x_at | Enoph1        | 1.60 |
| 1456240_x_at | Cdca4         | 1.60 |
| 1443086_at   | Alcam         | 1.60 |
| 1442018_at   | Btg1          | 1.60 |
| 1418686_at   | Oas1c         | 1.60 |
| 1441843_s_at | 5230400M03Rik | 1.60 |
| 1443882_at   | Slc26a2       | 1.60 |
| 1420909_at   | Vegfa         | 1.60 |
| 1439587_at   | Lemd3         | 1.60 |
| 1433169_at   | 5830456J23Rik | 1.60 |
| 1437451_at   | Eccscr        | 1.59 |
| 1436074_at   | Nfkbid        | 1.59 |
| 1437789_at   | Birc6         | 1.59 |
| 1450716_at   | Adamts1       | 1.59 |
| 1438828_at   | Rapgef6       | 1.59 |
| 1453064_at   | Etaa1         | 1.59 |
| 1439047_s_at | Recql         | 1.59 |
| 1435316_at   | Psma6         | 1.59 |

|              |               |      |
|--------------|---------------|------|
| 1428484_at   | Osbp13        | 1.59 |
| 1417627_a_at | Limk1         | 1.59 |
| 1459884_at   | Cox7c         | 1.59 |
| 1455660_at   | Csf2rb        | 1.59 |
| 1448511_at   | Ptprcap       | 1.59 |
| 1440245_at   | Ccdc88b       | 1.59 |
| 1418587_at   | Traf3         | 1.59 |
| 1424339_at   | Oasl1         | 1.58 |
| 1416166_a_at | Prdx4         | 1.58 |
| 1427095_at   | Cdcp1         | 1.58 |
| 1456288_at   | Slfn5         | 1.58 |
| 1452239_at   | Gt(ROSA)26Sor | 1.58 |
| 1449516_a_at | Rgs3          | 1.58 |
| 1424829_at   | A830007P12Rik | 1.58 |
| 1454402_at   | Zfp942        | 1.58 |
| 1434139_at   | Parp11        | 1.58 |
| 1428583_at   | Nufip2        | 1.58 |
| 1451097_at   | Vasp          | 1.58 |
| 1458595_at   | Intu          | 1.58 |
| 1457550_at   | 9530059O14Rik | 1.58 |
| 1419530_at   | Il12b         | 1.58 |
| 1447762_x_at | Car12         | 1.58 |
| 1417588_at   | Galnt3        | 1.58 |
| 1437052_s_at | Slc2a3        | 1.58 |
| 1435084_at   | C730049O14Rik | 1.58 |
| 1419235_s_at | Helb          | 1.57 |
| 1440147_at   | Lgi2          | 1.57 |
| 1460347_at   | Krt14         | 1.57 |
| 1452991_at   | Chd2          | 1.57 |
| 1429758_at   | 1700017B05Rik | 1.57 |
| 1449508_at   | Il27ra        | 1.57 |
| 1416087_at   | Ap1s1         | 1.57 |
| 1438673_at   | Slc4a7        | 1.57 |
| 1438750_at   | Atrx          | 1.57 |
| 1423869_s_at | Txnrd3        | 1.57 |
| 1420692_at   | Il2ra         | 1.57 |
| 1449227_at   | Ch25h         | 1.57 |
| 1425241_a_at | Wsb1          | 1.57 |
| 1450387_s_at | Ak4           | 1.56 |
| 1427164_at   | Il13ra1       | 1.56 |
| 1455084_x_at | Shmt2         | 1.56 |
| 1452169_a_at | Dgkz          | 1.56 |
| 1420505_a_at | Stxbp1        | 1.56 |



|              |               |      |
|--------------|---------------|------|
| 1455839_at   | Uggt1         | 1.56 |
| 1428118_at   | Lingo1        | 1.56 |
| 1427539_a_at | Zwint         | 1.56 |
| 1418271_at   | Bhlhe22       | 1.56 |
| 1447851_x_at | Atp10a        | 1.56 |
| 1452837_at   | Lpin2         | 1.56 |
| 1420171_s_at | Myh9          | 1.55 |
| 1439253_x_at | Prelid1       | 1.55 |
| 1452803_at   | Glipr2        | 1.55 |
| 1456914_at   | Slc16a4       | 1.55 |
| 1448202_x_at | Prelid1       | 1.55 |
| 1452391_at   | Cxadr         | 1.55 |
| 1435595_at   | 1810011O10Rik | 1.55 |
| 1452903_at   | 6230427J02Rik | 1.55 |
| 1451110_at   | Egln1         | 1.55 |
| 1435564_at   | Neurl1b       | 1.55 |
| 1422489_at   | Mogs          | 1.55 |
| 1452337_at   | 4930427A07Rik | 1.54 |
| 1459983_at   | Impa2         | 1.54 |
| 1432997_at   | 5830462P14Rik | 1.54 |
| 1457304_at   | D13Ertd787e   | 1.54 |
| 1417955_at   | Ccdc71        | 1.54 |
| 1428034_a_at | Tnfrsf9       | 1.54 |
| 1439455_x_at | Capza1        | 1.54 |
| 1451608_a_at | Tspan33       | 1.54 |
| 1417878_at   | E2f1          | 1.54 |
| 1448894_at   | Akr1b8        | 1.54 |
| 1455067_at   | Psd4          | 1.53 |
| 1457410_at   | Arhgap5       | 1.53 |
| 1436848_x_at | Impa1         | 1.53 |
| 1436395_at   | Card6         | 1.53 |
| 1436729_at   | Afap1         | 1.53 |
| 1437185_s_at | Tmsb10        | 1.53 |
| 1428018_a_at | AF251705      | 1.53 |
| 1431528_at   | 5830427D02Rik | 1.53 |
| 1425760_a_at | Pitpnm1       | 1.53 |
| 1418492_at   | Grem2         | 1.53 |
| 1445201_at   | Zfp53         | 1.53 |
| 1459894_at   | Iqgap2        | 1.53 |
| 1438154_x_at | 2610002J02Rik | 1.53 |
| 1434573_at   | Traf3ip3      | 1.53 |
| 1433739_at   | Nol10         | 1.53 |
| 1434070_at   | Jag1          | 1.52 |

|              |               |      |
|--------------|---------------|------|
| 1423826_at   | Noc4l         | 1.52 |
| 1416875_at   | Parvg         | 1.52 |
| 1447792_x_at | Gpr174        | 1.52 |
| 1417128_at   | Plekho1       | 1.52 |
| 1427260_a_at | Tpm3          | 1.52 |
| 1416379_at   | Panx1         | 1.52 |
| 1437239_x_at | Phc2          | 1.52 |
| 1451415_at   | 1810011O10Rik | 1.52 |
| 1448713_at   | Stat4         | 1.52 |
| 1421937_at   | Dapp1         | 1.51 |
| 1433748_at   | Zdhhc18       | 1.51 |
| 1454350_at   | Intu          | 1.51 |
| 1429128_x_at | Nfkb2         | 1.51 |
| 1418004_a_at | Tmem176b      | 1.51 |
| 1423154_at   | BC005537      | 1.51 |
| 1426677_at   | Flna          | 1.51 |
| 1448600_s_at | Vav3          | 1.51 |
| 1457539_at   | D10Ertd709e   | 1.51 |
| 1420914_at   | Slco2a1       | 1.51 |
| 1429247_at   | Anxa6         | 1.51 |
| 1452411_at   | Lrrc1         | 1.51 |
| 1449619_s_at | Arhgap9       | 1.51 |
| 1420351_at   | Tnfrsf4       | 1.51 |
| 1437242_at   | Ttll12        | 1.51 |
| 1439444_x_at | Tmed10        | 1.50 |
| 1448933_at   | Pcdhb17       | 1.50 |
| 1434219_at   | Stim2         | 1.50 |
| 1455428_at   | Fam53b        | 1.50 |
| 1419226_at   | Cd96          | 1.50 |
| 1435169_at   | A930001N09Rik | 0.67 |
| 1451348_at   | Deptor        | 0.67 |
| 1425411_at   | Arl4a         | 0.67 |
| 1428864_at   | Dusp8         | 0.67 |
| 1426522_at   | Hadhb         | 0.67 |
| 1417312_at   | Dkk3          | 0.67 |
| 1418190_at   | Pon1          | 0.67 |
| 1454078_a_at | Gal3st1       | 0.66 |
| 1425145_at   | Il1rl1        | 0.66 |
| 1417421_at   | S100a1        | 0.66 |
| 1460192_at   | Osbp1a        | 0.66 |
| 1419963_at   | Deptor        | 0.66 |
| 1415743_at   | Hdac5         | 0.66 |
| 1435559_at   | Myo6          | 0.66 |

|              |               |      |
|--------------|---------------|------|
| 1450395_at   | Slc22a5       | 0.66 |
| 1428469_a_at | Dzip1         | 0.66 |
| 1429884_at   | Srgap2        | 0.66 |
| 1450971_at   | Gadd45b       | 0.66 |
| 1436344_at   | C2cd2         | 0.66 |
| 1418921_at   | Cadm3         | 0.65 |
| 1421471_at   | Npy1r         | 0.65 |
| 1453571_at   | Deptor        | 0.65 |
| 1452283_at   | Rassf8        | 0.65 |
| 1416268_at   | Ets2          | 0.65 |
| 1423364_a_at | Aktip         | 0.65 |
| 1453069_at   | Pik3cb        | 0.65 |
| 1422838_at   | Kcnu1         | 0.65 |
| 1433977_at   | Hs3st3b1      | 0.65 |
| 1426010_a_at | Epb4.1l3      | 0.65 |
| 1455029_at   | Kif21a        | 0.65 |
| 1460406_at   | Pls1          | 0.65 |
| 1434581_at   | 2410066E13Rik | 0.65 |
| 1422740_at   | Tnfrsf21      | 0.65 |
| 1435396_at   | Stxbp6        | 0.65 |
| 1419688_at   | Gpc6          | 0.65 |
| 1418658_at   | Fam82b        | 0.65 |
| 1419457_at   | Rgnef         | 0.65 |
| 1443904_at   | Fads6         | 0.65 |
| 1425186_at   | Lmbrd1        | 0.65 |
| 1450286_at   | Npr3          | 0.65 |
| 1425037_at   | Fgd4          | 0.64 |
| 1437871_at   | Pgm5          | 0.64 |
| 1416774_at   | Wee1          | 0.64 |
| 1458129_at   | Rora          | 0.64 |
| 1433460_at   | Ttc7b         | 0.64 |
| 1451200_at   | Kif1b         | 0.64 |
| 1448320_at   | Stim1         | 0.64 |
| 1452309_at   | Cgnl1         | 0.64 |
| 1454824_s_at | Mtus1         | 0.64 |
| 1415981_at   | Herpud2       | 0.64 |
| 1419505_a_at | Ggps1         | 0.64 |
| 1457686_at   | Akap17b       | 0.63 |
| 1437149_at   | Slc6a6        | 0.63 |
| 1437661_at   | AU021092      | 0.63 |
| 1443906_at   | Cd55          | 0.63 |
| 1451714_a_at | Map2k3        | 0.63 |
| 1435693_at   | Mall          | 0.63 |

|              |           |      |
|--------------|-----------|------|
| 1451563_at   | Emr4      | 0.63 |
| 1452333_at   | Smarca2   | 0.63 |
| 1428835_at   | Myh14     | 0.63 |
| 1433711_s_at | Sesn1     | 0.63 |
| 1448669_at   | Dkk3      | 0.63 |
| 1416778_at   | Sdpr      | 0.63 |
| 1449082_at   | Mfap5     | 0.63 |
| 1425891_a_at | Grtp1     | 0.63 |
| 1418250_at   | Arl4d     | 0.63 |
| 1458882_at   | Serpinb8  | 0.62 |
| 1418714_at   | Dusp8     | 0.62 |
| 1431216_s_at | Dnajc6    | 0.62 |
| 1426208_x_at | Plagl1    | 0.62 |
| 1425138_at   | Guca1b    | 0.62 |
| 1425318_a_at | Tmem116   | 0.62 |
| 1423176_at   | Tob1      | 0.62 |
| 1425515_at   | Pik3r1    | 0.62 |
| 1455665_at   | Lonrf1    | 0.62 |
| 1426576_at   | Sgms1     | 0.62 |
| 1440559_at   | Hmga2-ps1 | 0.62 |
| 1417545_at   | Trpv4     | 0.62 |
| 1418954_at   | Camkk1    | 0.62 |
| 1424701_at   | Pcdh20    | 0.62 |
| 1454881_s_at | Upk3b     | 0.62 |
| 1419378_a_at | Fxyd2     | 0.62 |
| 1448926_at   | Hoxa5     | 0.62 |
| 1437731_at   | C2cd2     | 0.62 |
| 1436501_at   | Mtus1     | 0.61 |
| 1450110_at   | Adh7      | 0.61 |
| 1417013_at   | Hspb8     | 0.61 |
| 1443969_at   | Irs2      | 0.61 |
| 1450206_at   | Dlc1      | 0.61 |
| 1428774_at   | Gpc6      | 0.61 |
| 1422904_at   | Fmo2      | 0.61 |
| 1425321_a_at | Clmn      | 0.61 |
| 1426743_at   | Appl2     | 0.61 |
| 1427945_at   | Dpyd      | 0.61 |
| 1428321_at   | Eml1      | 0.60 |
| 1431226_a_at | Fndc4     | 0.60 |
| 1421848_at   | Slc22a5   | 0.60 |
| 1428731_at   | Usp54     | 0.60 |
| 1456939_at   | Fam154b   | 0.60 |
| 1424408_at   | Lims2     | 0.60 |

|              |           |      |
|--------------|-----------|------|
| 1426139_a_at | Ccrl1     | 0.60 |
| 1426332_a_at | Cldn3     | 0.60 |
| 1416823_a_at | Osbp1a    | 0.60 |
| 1423994_at   | Kif1b     | 0.60 |
| 1415904_at   | Lpl       | 0.60 |
| 1429656_at   | Rhobtb1   | 0.60 |
| 1421158_at   | Cgnl1     | 0.60 |
| 1456150_at   | Jhdm1d    | 0.60 |
| 1454604_s_at | Tspan12   | 0.59 |
| 1434307_at   | Tmem64    | 0.59 |
| 1431188_a_at | Tom1      | 0.59 |
| 1416926_at   | Trp53inp1 | 0.59 |
| 1423447_at   | Clpx      | 0.59 |
| 1451782_a_at | Slc29a1   | 0.59 |
| 1423174_a_at | Pard6b    | 0.59 |
| 1436293_x_at | Ildr2     | 0.59 |
| 1444073_at   | Maf       | 0.59 |
| 1447462_at   | D7Wsu130e | 0.59 |
| 1424280_at   | Mospd1    | 0.59 |
| 1451270_at   | Dusp18    | 0.59 |
| 1451207_at   | Micu1     | 0.59 |
| 1455056_at   | Lmo7      | 0.59 |
| 1437409_s_at | Gpr126    | 0.59 |
| 1436988_at   | Ism1      | 0.58 |
| 1420718_at   | Odz2      | 0.58 |
| 1425456_a_at | Map2k3    | 0.58 |
| 1450318_a_at | P2ry2     | 0.58 |
| 1436853_a_at | Snca      | 0.58 |
| 1424437_s_at | Abcg4     | 0.58 |
| 1426285_at   | Lama2     | 0.58 |
| 1417962_s_at | Ghr       | 0.58 |
| 1455340_at   | Dennd5b   | 0.58 |
| 1415874_at   | Spry1     | 0.58 |
| 1435105_at   | Rnf208    | 0.58 |
| 1428240_at   | Nrxn1     | 0.58 |
| 1425906_a_at | Sema3e    | 0.58 |
| 1454926_at   | Sphkap    | 0.58 |
| 1416316_at   | Slc27a2   | 0.58 |
| 1434917_at   | Cobl      | 0.57 |
| 1429778_at   | Optn      | 0.57 |
| 1436350_at   | Fam171b   | 0.57 |
| 1452207_at   | Cited2    | 0.57 |
| 1428547_at   | Nt5e      | 0.57 |

|              |         |      |
|--------------|---------|------|
| 1426263_at   | Cadm4   | 0.57 |
| 1429036_at   | Otop3   | 0.57 |
| 1435763_at   | Tbc1d16 | 0.57 |
| 1420942_s_at | Rgs5    | 0.57 |
| 1450974_at   | Timp4   | 0.57 |
| 1434639_at   | Klhl29  | 0.56 |
| 1421346_a_at | Slc6a6  | 0.56 |
| 1433742_at   | Kank1   | 0.56 |
| 1435207_at   | Dixdc1  | 0.56 |
| 1450838_x_at | Rpl37   | 0.56 |
| 1457671_at   | Homer2  | 0.56 |
| 1422008_a_at | Aqp3    | 0.56 |
| 1415864_at   | Bpgm    | 0.56 |
| 1437181_at   | Peli2   | 0.56 |
| 1416072_at   | Cd34    | 0.56 |
| 1460514_s_at | Ascl2   | 0.56 |
| 1420941_at   | Rgs5    | 0.56 |
| 1423966_at   | Cd99l2  | 0.55 |
| 1435435_at   | Cttnbp2 | 0.55 |
| 1428336_at   | Agpat4  | 0.55 |
| 1419458_at   | Rgnef   | 0.55 |
| 1424567_at   | Tspan2  | 0.55 |
| 1419491_at   | Defb1   | 0.55 |
| 1415865_s_at | Bpgm    | 0.55 |
| 1422667_at   | Krt15   | 0.55 |
| 1417355_at   | Peg3    | 0.55 |
| 1439478_at   | Acot2   | 0.55 |
| 1450460_at   | Aqp3    | 0.55 |
| 1426510_at   | Sccpdh  | 0.55 |
| 1422996_at   | Acot2   | 0.55 |
| 1433454_at   | Abtb2   | 0.55 |
| 1436640_x_at | Agpat4  | 0.55 |
| 1453008_at   | Trnp1   | 0.55 |
| 1424392_at   | Adhfe1  | 0.54 |
| 1417332_at   | Rfx2    | 0.54 |
| 1419197_x_at | Hamp    | 0.54 |
| 1429001_at   | Pir     | 0.54 |
| 1438496_a_at | Ddx26b  | 0.54 |
| 1454699_at   | Sesn1   | 0.54 |
| 1437217_at   | Ankrd6  | 0.54 |
| 1418412_at   | Tpd52l1 | 0.54 |
| 1424747_at   | Kif1c   | 0.54 |
| 1454646_at   | Tcp11l2 | 0.54 |

|              |           |      |
|--------------|-----------|------|
| 1421040_a_at | Gsta2     | 0.53 |
| 1434326_x_at | Coro2b    | 0.53 |
| 1417027_at   | Trim2     | 0.53 |
| 1460242_at   | Cd55      | 0.53 |
| 1453119_at   | Otud1     | 0.53 |
| 1420688_a_at | Sgce      | 0.53 |
| 1450119_at   | Dst       | 0.53 |
| 1448119_at   | Bpgm      | 0.53 |
| 1456481_at   | Esyt3     | 0.53 |
| 1422168_a_at | Bdnf      | 0.53 |
| 1434542_at   | Gpt2      | 0.52 |
| 1422905_s_at | Fmo2      | 0.52 |
| 1425809_at   | Fabp4     | 0.52 |
| 1439549_at   | Prrg3     | 0.52 |
| 1448416_at   | Mgp       | 0.52 |
| 1437197_at   | Sorbs2    | 0.52 |
| 1422619_at   | Ppap2a    | 0.52 |
| 1436737_a_at | Sorbs1    | 0.52 |
| 1422620_s_at | Ppap2a    | 0.52 |
| 1427378_at   | Krt75     | 0.52 |
| 1416779_at   | Sdpr      | 0.51 |
| 1451501_a_at | Ghr       | 0.51 |
| 1423506_a_at | Nnat      | 0.51 |
| 1422974_at   | Nt5e      | 0.51 |
| 1425761_a_at | Nfatc1    | 0.51 |
| 1458268_s_at | Igfbp3    | 0.51 |
| 1460241_a_at | St3gal5   | 0.50 |
| 1417028_a_at | Trim2     | 0.50 |
| 1456397_at   | Cdh4      | 0.50 |
| 1434156_at   | Rab11fip4 | 0.50 |
| 1429024_at   | Rbm20     | 0.50 |
| 1441254_at   | Pard3b    | 0.50 |
| 1419289_a_at | Syngr1    | 0.50 |
| 1422112_at   | Ccbp2     | 0.50 |
| 1444559_at   | Phtf2     | 0.50 |
| 1451410_a_at | Crip3     | 0.50 |
| 1420017_at   | Tspan8    | 0.50 |
| 1416194_at   | Cyp4b1    | 0.50 |
| 1434013_at   | Ablim3    | 0.49 |
| 1419706_a_at | Akap12    | 0.49 |
| 1451762_a_at | Kif1b     | 0.49 |
| 1427371_at   | Abca8a    | 0.49 |
| 1424007_at   | Gdf10     | 0.49 |

|              |               |      |
|--------------|---------------|------|
| 1424155_at   | Fabp4         | 0.48 |
| 1428357_at   | 2610019F03Rik | 0.48 |
| 1454654_at   | Dirc2         | 0.48 |
| 1456796_at   | Snai3         | 0.48 |
| 1417702_a_at | Hnmt          | 0.48 |
| 1450738_at   | Kif21a        | 0.48 |
| 1422007_at   | Aqp3          | 0.48 |
| 1417014_at   | Hspb8         | 0.47 |
| 1438422_at   | Lrrc20        | 0.47 |
| 1417029_a_at | Trim2         | 0.47 |
| 1417673_at   | Grb14         | 0.47 |
| 1428471_at   | Sorbs1        | 0.47 |
| 1439117_at   | Clmn          | 0.47 |
| 1427946_s_at | Dpyd          | 0.46 |
| 1418317_at   | Lhx2          | 0.46 |
| 1424367_a_at | Homer2        | 0.46 |
| 1454691_at   | Nrxn1         | 0.46 |
| 1419082_at   | Serpinb2      | 0.46 |
| 1434651_a_at | Cldn3         | 0.46 |
| 1460569_x_at | Cldn3         | 0.45 |
| 1431056_a_at | Lpl           | 0.45 |
| 1443832_s_at | Sdpr          | 0.45 |
| 1451701_x_at | Cldn3         | 0.45 |
| 1419490_at   | Fam19a5       | 0.45 |
| 1428792_at   | Bcas1         | 0.45 |
| 1419492_s_at | Defb1         | 0.45 |
| 1424393_s_at | Adhfe1        | 0.44 |
| 1448978_at   | Ngef          | 0.44 |
| 1429344_at   | 9.13E+15      | 0.44 |
| 1437637_at   | Phtf2         | 0.44 |
| 1425826_a_at | Sorbs1        | 0.44 |
| 1451620_at   | C1ql3         | 0.44 |
| 1450759_at   | Bmp6          | 0.43 |
| 1433638_s_at | Hoxd8         | 0.43 |
| 1415996_at   | Txnip         | 0.43 |
| 1448551_a_at | Trim2         | 0.43 |
| 1426981_at   | Pcsk6         | 0.43 |
| 1427673_a_at | Sema3e        | 0.43 |
| 1451527_at   | Pcolce2       | 0.43 |
| 1434877_at   | Nptx1         | 0.42 |
| 1453435_a_at | Fmo2          | 0.42 |
| 1449621_s_at | Thsd1         | 0.42 |
| 1431805_a_at | Rhpn2         | 0.42 |



|              |               |      |
|--------------|---------------|------|
| 1449824_at   | Prg4          | 0.41 |
| 1416129_at   | Errfi1        | 0.41 |
| 1434628_a_at | Rhpn2         | 0.41 |
| 1455214_at   | Mitf          | 0.41 |
| 1427345_a_at | Sult1a1       | 0.41 |
| 1418205_at   | Thsd1         | 0.40 |
| 1419414_at   | Gng13         | 0.40 |
| 1437840_s_at | D2hgdh        | 0.40 |
| 1423635_at   | Bmp2          | 0.40 |
| 1423679_at   | 2810432L12Rik | 0.39 |
| 1418063_at   | Kera          | 0.39 |
| 1434667_at   | Col8a2        | 0.39 |
| 1424649_a_at | Tspan8        | 0.39 |
| 1446498_at   | Il20ra        | 0.39 |
| 1441918_x_at | Serpinb6e     | 0.39 |
| 1415997_at   | Txnip         | 0.39 |
| 1431833_a_at | Hmgcs2        | 0.38 |
| 1418589_a_at | Mlf1          | 0.38 |
| 1419717_at   | Sema3e        | 0.38 |
| 1429166_s_at | Clmn          | 0.38 |
| 1435459_at   | Fmo2          | 0.38 |
| 1434669_at   | Ralgps1       | 0.38 |
| 1431099_at   | Hoxd8         | 0.38 |
| 1434657_at   | Gls           | 0.37 |
| 1418595_at   | Plin4         | 0.36 |
| 1434474_at   | Abca5         | 0.36 |
| 1417168_a_at | Usp2          | 0.36 |
| 1427029_at   | Htra3         | 0.35 |
| 1456895_at   | Cd209b        | 0.34 |
| 1416225_at   | Adh1          | 0.34 |
| 1454969_at   | Lypd6         | 0.34 |
| 1456741_s_at | Gpm6a         | 0.34 |
| 1442226_at   | Sema3e        | 0.33 |
| 1451478_at   | Angptl7       | 0.33 |
| 1418706_at   | Slc38a3       | 0.32 |
| 1436279_at   | Slc26a7       | 0.32 |
| 1460244_at   | Upb1          | 0.32 |
| 1459737_s_at | Ttr           | 0.31 |
| 1419816_s_at | Errfi1        | 0.31 |
| 1417765_a_at | Amy1          | 0.30 |
| 1446681_at   | BB086117      | 0.30 |
| 1433837_at   | 8430408G22Rik | 0.30 |
| 1454965_at   | Fam171b       | 0.29 |

|              |               |      |
|--------------|---------------|------|
| 1433596_at   | Dnajc6        | 0.29 |
| 1425357_a_at | Grem1         | 0.29 |
| 1455913_x_at | Ttr           | 0.29 |
| 1433836_a_at | 8430408G22Rik | 0.28 |
| 1451382_at   | Chac1         | 0.28 |
| 1454608_x_at | Ttr           | 0.26 |
| 1433877_at   | Fam46b        | 0.26 |
| 1425281_a_at | Tsc22d3       | 0.25 |
| 1451535_at   | Il31ra        | 0.24 |
| 1423405_at   | Timp4         | 0.23 |
| 1435184_at   | Npr3          | 0.23 |
| 1437665_at   | Il22ra2       | 0.22 |
| 1456512_at   | Pdzrn4        | 0.22 |
| 1417788_at   | Sncg          | 0.21 |
| 1460012_at   | Wfdc3         | 0.20 |
| 1452543_a_at | Scgb1a1       | 0.19 |
| 1419332_at   | Egfl6         | 0.19 |
| 1436643_x_at | Hamp2         | 0.18 |
| 1453327_at   | Krt24         | 0.17 |
| 1456487_at   | Adcy1         | 0.14 |
| 1449545_at   | Fgf18         | 0.12 |

**Supplementary Table 3. Differentially expressed genes in skin from human alopecia areata vs. skin from normal individuals.** Perilesional punch biopsies from 5 patients with patchy alopecia areata who were not undergoing local or systemic treatments were collected and compared to scalp biopsies from 5 unrelated unaffected individuals.

| <b>Affy_ID</b> | <b>GeneSymbol</b> | <b>FC</b> |
|----------------|-------------------|-----------|
| 221728_x_at    | XIST              | 56.06     |
| 211696_x_at    | HBB               | 13.20     |
| 204533_at      | CXCL10            | 12.37     |
| 203915_at      | CXCL9             | 9.53      |
| 204580_at      | MMP12             | 4.04      |
| 235763_at      | SLC44A5           | 3.83      |
| 205488_at      | GZMA              | 3.65      |
| 223809_at      | RGS18             | 3.54      |
| 201858_s_at    | SRGN              | 3.33      |
| 215784_at      | CD1E              | 3.19      |
| 216714_at      | CCL13             | 3.15      |
| 232024_at      | GIMAP2            | 3.13      |
| 1555745_a_at   | LYZ               | 3.09      |
| 205758_at      | CD8A              | 3.04      |
| 214059_at      | IFI44             | 3.03      |
| 226736_at      | CHURC1            | 3.02      |
| 206749_at      | CD1B              | 2.96      |
| 242943_at      | ST8SIA4           | 2.94      |
| 204439_at      | IFI44L            | 2.88      |
| 210656_at      | EED               | 2.87      |
| 220122_at      | MCTP1             | 2.78      |
| 210164_at      | GZMB              | 2.75      |
| 206134_at      | ADAMDEC1          | 2.70      |
| 209875_s_at    | SPP1              | 2.69      |
| 206666_at      | GZMK              | 2.68      |
| 204110_at      | HNMT              | 2.67      |
| 217147_s_at    | TRAT1             | 2.66      |
| 204057_at      | IRF8              | 2.64      |
| 212588_at      | PTPRC             | 2.63      |
| 214467_at      | GPR65             | 2.60      |
| 1554899_s_at   | FCER1G            | 2.60      |
| 242557_at      | ZNRD1-AS1         | 2.58      |

|              |          |      |
|--------------|----------|------|
| 209541_at    | IGF1     | 2.58 |
| 205991_s_at  | PRRX1    | 2.56 |
| 228956_at    | UGT8     | 2.55 |
| 207651_at    | GPR171   | 2.54 |
| 216598_s_at  | CCL2     | 2.54 |
| 211742_s_at  | EVI2B    | 2.52 |
| 231879_at    | COL12A1  | 2.52 |
| 1555827_at   | CCNL1    | 2.51 |
| 1552398_a_at | CLEC12A  | 2.50 |
| 213797_at    | RSAD2    | 2.49 |
| 211559_s_at  | CCNG2    | 2.47 |
| 209612_s_at  | ADH1B    | 2.45 |
| 230422_at    | FPR3     | 2.44 |
| 221978_at    | HLA-F    | 2.44 |
| 212230_at    | PPAP2B   | 2.44 |
| 210198_s_at  | PLP1     | 2.43 |
| 220330_s_at  | SAMSN1   | 2.42 |
| 203561_at    | FCGR2A   | 2.41 |
| 239345_at    | SLC19A3  | 2.41 |
| 227609_at    | EPSTI1   | 2.41 |
| 205226_at    | PDGFRL   | 2.37 |
| 1553678_a_at | ITGB1    | 2.37 |
| 206247_at    | MICB     | 2.37 |
| 208016_s_at  | AGTR1    | 2.36 |
| 1405_i_at    | CCL5     | 2.36 |
| 214972_at    | MGEA5    | 2.35 |
| 204774_at    | EVI2A    | 2.34 |
| 1557116_at   | APOL6    | 2.34 |
| 1558604_a_at | SSBP2    | 2.33 |
| 208894_at    | HLA-DRA  | 2.32 |
| 219607_s_at  | MS4A4A   | 2.32 |
| 238461_at    | EIF4E3   | 2.31 |
| 222587_s_at  | GALNT7   | 2.30 |
| 214617_at    | PRF1     | 2.30 |
| 204222_s_at  | GLIPR1   | 2.29 |
| 205039_s_at  | IKZF1    | 2.29 |
| 215073_s_at  | NR2F2    | 2.29 |
| 220477_s_at  | TMEM230  | 2.29 |
| 205270_s_at  | LCP2     | 2.29 |
| 226757_at    | IFIT2    | 2.28 |
| 1555229_a_at | C1S      | 2.28 |
| 1559584_a_at | C16orf54 | 2.28 |
| 203504_s_at  | ABCA1    | 2.28 |

|              |          |      |
|--------------|----------|------|
| 202902_s_at  | CTSS     | 2.27 |
| 1552612_at   | CDC42SE2 | 2.27 |
| 205158_at    | RNASE4   | 2.26 |
| 203708_at    | PDE4B    | 2.26 |
| 206271_at    | TLR3     | 2.25 |
| 205992_s_at  | IL15     | 2.24 |
| 228938_at    | MBP      | 2.24 |
| 1554712_a_at | GLYATL2  | 2.24 |
| 214279_s_at  | NDRG2    | 2.23 |
| 205831_at    | CD2      | 2.22 |
| 239364_at    | ETV6     | 2.22 |
| 206070_s_at  | EPHA3    | 2.22 |
| 224976_at    | NFIA     | 2.22 |
| 229584_at    | LRRK2    | 2.21 |
| 206693_at    | IL7      | 2.20 |
| 1558820_a_at | C18orf34 | 2.20 |
| 213882_at    | TM2D1    | 2.20 |
| 229450_at    | IFIT3    | 2.19 |
| 203680_at    | PRKAR2B  | 2.17 |
| 210889_s_at  | FCGR2B   | 2.17 |
| 227458_at    | CD274    | 2.17 |
| 203000_at    | STMN2    | 2.16 |
| 226603_at    | SAMD9L   | 2.16 |
| 208885_at    | LCP1     | 2.15 |
| 222726_s_at  | EXOC5    | 2.15 |
| 222722_at    | OGN      | 2.15 |
| 1558972_s_at | THEMIS   | 2.14 |
| 204118_at    | CD48     | 2.13 |
| 217649_at    | ZFAND5   | 2.13 |
| 204972_at    | OAS2     | 2.12 |
| 231577_s_at  | GBP1     | 2.11 |
| 228218_at    | LSAMP    | 2.11 |
| 230867_at    | COL6A6   | 2.11 |
| 229383_at    | 1-Mar    | 2.11 |
| 227677_at    | JAK3     | 2.10 |
| 230391_at    | CD84     | 2.09 |
| 204923_at    | SASH3    | 2.09 |
| 203416_at    | CD53     | 2.08 |
| 204116_at    | IL2RG    | 2.08 |
| 206307_s_at  | FOXD1    | 2.08 |
| 206120_at    | CD33     | 2.08 |
| 204563_at    | SELL     | 2.07 |
| 225957_at    | CREBRF   | 2.07 |

|              |         |      |
|--------------|---------|------|
| 220416_at    | ATP8B4  | 2.07 |
| 200605_s_at  | PRKAR1A | 2.07 |
| 209006_s_at  | C1orf63 | 2.07 |
| 232911_at    | ZFP14   | 2.06 |
| 1556209_at   | CLEC2B  | 2.06 |
| 1555938_x_at | VIM     | 2.05 |
| 219179_at    | DACT1   | 2.05 |
| 206366_x_at  | XCL1    | 2.05 |
| 235737_at    | TSLP    | 2.04 |
| 206978_at    | CCR2    | 2.04 |
| 235175_at    | GBP4    | 2.04 |
| 220868_s_at  | SLC7A10 | 2.03 |
| 211676_s_at  | IFNGR1  | 2.03 |
| 214887_at    | N4BP2L1 | 2.03 |
| 230206_at    | DOCK5   | 2.03 |
| 203100_s_at  | CDYL    | 2.02 |
| 203471_s_at  | PLEK    | 2.02 |
| 208925_at    | CLDND1  | 2.02 |
| 202820_at    | AHR     | 2.02 |
| 231366_at    | FDPSL2A | 2.02 |
| 204607_at    | HMGCS2  | 2.01 |
| 220199_s_at  | AIDA    | 2.01 |
| 204070_at    | RARRES3 | 2.01 |
| 227870_at    | IGDCC4  | 2.01 |
| 204865_at    | CA3     | 2.01 |
| 205842_s_at  | JAK2    | 2.00 |
| 241925_x_at  | SLC16A7 | 2.00 |
| 214533_at    | CMA1    | 2.00 |
| 209770_at    | BTN3A1  | 1.99 |
| 229543_at    | FAM26F  | 1.99 |
| 226847_at    | FST     | 1.99 |
| 210971_s_at  | ARNTL   | 1.98 |
| 204279_at    | PSMB9   | 1.98 |
| 205291_at    | IL2RB   | 1.98 |
| 204959_at    | MNDA    | 1.98 |
| 227467_at    | RDH10   | 1.98 |
| 206545_at    | CD28    | 1.98 |
| 203758_at    | CTSO    | 1.98 |
| 214724_at    | DIXDC1  | 1.98 |
| 216231_s_at  | B2M     | 1.97 |
| 210029_at    | IDO1    | 1.97 |
| 206914_at    | CRTAM   | 1.97 |
| 211734_s_at  | FCER1A  | 1.97 |

|              |          |      |
|--------------|----------|------|
| 218404_at    | SNX10    | 1.96 |
| 206960_at    | LPAR4    | 1.96 |
| 202742_s_at  | PRKACB   | 1.96 |
| 213293_s_at  | TRIM22   | 1.96 |
| 1555778_a_at | POSTN    | 1.96 |
| 227266_s_at  | FYB      | 1.96 |
| 217465_at    | NCKAP1   | 1.95 |
| 244774_at    | PHACTR2  | 1.95 |
| 232392_at    | SRSF3    | 1.94 |
| 213193_x_at  | TRBC1    | 1.94 |
| 216511_s_at  | TCF7L2   | 1.94 |
| 228504_at    | SCN7A    | 1.93 |
| 201151_s_at  | MBNL1    | 1.93 |
| 242268_at    | CELF2    | 1.92 |
| 220777_at    | KIF13A   | 1.92 |
| 205987_at    | CD1C     | 1.92 |
| 201008_s_at  | TXNIP    | 1.92 |
| 202527_s_at  | SMAD4    | 1.91 |
| 224480_s_at  | AGPAT9   | 1.91 |
| 223220_s_at  | PARP9    | 1.91 |
| 209960_at    | HGF      | 1.91 |
| 210057_at    | SMG1     | 1.91 |
| 203305_at    | F13A1    | 1.91 |
| 213649_at    | SRSF7    | 1.90 |
| 226392_at    | RASA2    | 1.90 |
| 205159_at    | CSF2RB   | 1.90 |
| 213435_at    | SATB2    | 1.90 |
| 226743_at    | SLFN11   | 1.90 |
| 204205_at    | APOBEC3G | 1.90 |
| 203936_s_at  | MMP9     | 1.90 |
| 223501_at    | TNFSF13B | 1.90 |
| 212208_at    | MED13L   | 1.89 |
| 203966_s_at  | PPM1A    | 1.89 |
| 204438_at    | MRC1     | 1.89 |
| 235458_at    | HAVCR2   | 1.89 |
| 207610_s_at  | EMR2     | 1.89 |
| 222859_s_at  | DAPP1    | 1.89 |
| 1552628_a_at | HERPUD2  | 1.89 |
| 221207_s_at  | NBEA     | 1.88 |
| 205101_at    | CIITA    | 1.88 |
| 205083_at    | AOX1     | 1.88 |
| 230023_at    | NSUN4    | 1.88 |
| 214450_at    | CTSW     | 1.88 |

|              |              |      |
|--------------|--------------|------|
| 1568752_s_at | RGS13        | 1.88 |
| 237919_at    | RFFL         | 1.88 |
| 232898_at    | DAB2         | 1.87 |
| 234975_at    | GSPT1        | 1.87 |
| 227198_at    | AFF3         | 1.87 |
| 205799_s_at  | SLC3A1       | 1.87 |
| 242974_at    | CD47         | 1.87 |
| 1555852_at   | LOC100507463 | 1.87 |
| 201604_s_at  | PPP1R12A     | 1.87 |
| 244455_at    | KCNT2        | 1.86 |
| 210163_at    | CXCL11       | 1.86 |
| 219279_at    | DOCK10       | 1.86 |
| 203165_s_at  | SLC33A1      | 1.86 |
| 222161_at    | NAALAD2      | 1.86 |
| 221724_s_at  | CLEC4A       | 1.86 |
| 226841_at    | MPEG1        | 1.86 |
| 229713_at    | PIP4K2A      | 1.85 |
| 231776_at    | EOMES        | 1.85 |
| 209040_s_at  | PSMB8        | 1.85 |
| 221760_at    | MAN1A1       | 1.85 |
| 215303_at    | DCLK1        | 1.85 |
| 208191_x_at  | PSG4         | 1.85 |
| 228057_at    | DDIT4L       | 1.85 |
| 230364_at    | CHPT1        | 1.85 |
| 206637_at    | P2RY14       | 1.84 |
| 218806_s_at  | VAV3         | 1.84 |
| 224451_x_at  | ARHGAP9      | 1.84 |
| 215363_x_at  | FOLH1        | 1.84 |
| 212298_at    | NRP1         | 1.84 |
| 206082_at    | HCP5         | 1.84 |
| 223271_s_at  | CTDSPL2      | 1.84 |
| 222235_s_at  | CSGALNACT2   | 1.84 |
| 237753_at    | IL21R        | 1.84 |
| 210895_s_at  | CD86         | 1.84 |
| 201619_at    | PRDX3        | 1.84 |
| 237189_at    | HOXB-AS1     | 1.84 |
| 1552658_a_at | NAV3         | 1.84 |
| 205803_s_at  | TRPC1        | 1.83 |
| 208121_s_at  | PTPRO        | 1.83 |
| 243352_at    | ALPK1        | 1.83 |
| 1555749_at   | SF1          | 1.83 |
| 227629_at    | PRLR         | 1.83 |
| 210896_s_at  | ASPH         | 1.83 |



|              |          |      |
|--------------|----------|------|
| 211671_s_at  | NR3C1    | 1.83 |
| 221423_s_at  | YIPF5    | 1.82 |
| 204821_at    | BTN3A3   | 1.82 |
| 204951_at    | RHOH     | 1.82 |
| 219093_at    | PID1     | 1.82 |
| 230177_at    | GTF2H2B  | 1.82 |
| 234305_s_at  | GSDMC    | 1.82 |
| 204149_s_at  | GSTM4    | 1.82 |
| 221428_s_at  | TBL1XR1  | 1.82 |
| 219427_at    | FAT4     | 1.82 |
| 1565939_at   | C5orf22  | 1.81 |
| 238725_at    | IRF1     | 1.81 |
| 205681_at    | BCL2A1   | 1.81 |
| 203302_at    | DCK      | 1.81 |
| 220005_at    | P2RY13   | 1.80 |
| 208671_at    | SERINC1  | 1.80 |
| 215318_at    | MINOS1P1 | 1.80 |
| 223217_s_at  | NFKBIZ   | 1.80 |
| 242172_at    | MEIS1    | 1.80 |
| 214038_at    | CCL8     | 1.80 |
| 201688_s_at  | TPD52    | 1.80 |
| 239384_at    | FLJ44342 | 1.80 |
| 214917_at    | PRKAA1   | 1.80 |
| 201720_s_at  | LAPTM5   | 1.80 |
| 1554462_a_at | DNAJB9   | 1.79 |
| 226702_at    | CMPK2    | 1.79 |
| 208131_s_at  | PTGIS    | 1.79 |
| 239297_at    | KIAA1456 | 1.79 |
| 223802_s_at  | RBBP6    | 1.79 |
| 1555193_a_at | ZNF277   | 1.78 |
| 225415_at    | DTX3L    | 1.78 |
| 203932_at    | HLA-DMB  | 1.78 |
| 203320_at    | SH2B3    | 1.78 |
| 228704_s_at  | CLDN23   | 1.78 |
| 228094_at    | AMICA1   | 1.78 |
| 204955_at    | SRPX     | 1.77 |
| 206752_s_at  | DFFB     | 1.77 |
| 1557071_s_at | NUB1     | 1.77 |
| 204011_at    | SPRY2    | 1.77 |
| 210280_at    | MPZ      | 1.77 |
| 214855_s_at  | RALGAPA1 | 1.77 |
| 227900_at    | CBLB     | 1.77 |
| 1558523_at   | FAM184A  | 1.77 |

|              |          |      |
|--------------|----------|------|
| 205280_at    | GLRB     | 1.77 |
| 228225_at    | PEX2     | 1.77 |
| 218986_s_at  | DDX60    | 1.76 |
| 210184_at    | ITGAX    | 1.76 |
| 242900_at    | ALG10B   | 1.76 |
| 213016_at    | BBX      | 1.76 |
| 208146_s_at  | CPVL     | 1.76 |
| 1556498_at   | FAM69A   | 1.76 |
| 206420_at    | IGSF6    | 1.76 |
| 205660_at    | OASL     | 1.76 |
| 225700_at    | GLCCI1   | 1.76 |
| 1554479_a_at | CARD8    | 1.76 |
| 210176_at    | TLR1     | 1.76 |
| 203157_s_at  | GLS      | 1.76 |
| 207113_s_at  | TNF      | 1.76 |
| 228617_at    | XAF1     | 1.76 |
| 205907_s_at  | OMD      | 1.76 |
| 202411_at    | IFI27    | 1.75 |
| 204567_s_at  | ABCG1    | 1.75 |
| 209788_s_at  | ERAP1    | 1.75 |
| 213426_s_at  | CAV2     | 1.75 |
| 225980_at    | C14orf43 | 1.75 |
| 220560_at    | C11orf21 | 1.75 |
| 1559265_at   | SKIDA1   | 1.75 |
| 238858_at    | TIFA     | 1.75 |
| 210538_s_at  | BIRC3    | 1.75 |
| 207957_s_at  | PRKCB    | 1.75 |
| 207175_at    | ADIPOQ   | 1.74 |
| 229866_at    | STK32A   | 1.74 |
| 216198_at    | ATF7IP   | 1.74 |
| 235228_at    | CCDC85A  | 1.74 |
| 205821_at    | KLRK1    | 1.74 |
| 203387_s_at  | TBC1D4   | 1.74 |
| 226459_at    | PIK3AP1  | 1.74 |
| 233898_s_at  | FGFR1OP2 | 1.74 |
| 220103_s_at  | MRPS18C  | 1.73 |
| 239921_at    | COL28A1  | 1.73 |
| 227910_at    | XPNPEP3  | 1.73 |
| 203741_s_at  | ADCY7    | 1.73 |
| 229431_at    | RFXAP    | 1.73 |
| 226641_at    | ANKRD44  | 1.73 |
| 205934_at    | PLCL1    | 1.73 |
| 225975_at    | PCDH18   | 1.73 |

|              |             |      |
|--------------|-------------|------|
| 215990_s_at  | BCL6        | 1.73 |
| 201417_at    | SOX4        | 1.73 |
| 241440_at    | FLJ30375    | 1.73 |
| 231955_s_at  | HIBADH      | 1.72 |
| 234165_at    | PTGDR       | 1.72 |
| 219292_at    | THAP1       | 1.72 |
| 1567628_at   | CD74        | 1.72 |
| 203434_s_at  | MME         | 1.72 |
| 211922_s_at  | CAT         | 1.72 |
| 210571_s_at  | CMAHP       | 1.72 |
| 206030_at    | ASPA        | 1.72 |
| 1554547_at   | FAM13C      | 1.72 |
| 207977_s_at  | DPT         | 1.72 |
| 219230_at    | TMEM100     | 1.72 |
| 213475_s_at  | ITGAL       | 1.72 |
| 227529_s_at  | AKAP12      | 1.72 |
| 227148_at    | PLEKHH2     | 1.72 |
| 243407_at    | MFSD8       | 1.72 |
| 223620_at    | GPR34       | 1.72 |
| 214181_x_at  | LST1        | 1.72 |
| 208510_s_at  | PPARG       | 1.72 |
| 235165_at    | PARD6B      | 1.71 |
| 218400_at    | OAS3        | 1.71 |
| 228826_at    | BZRAP1-AS1  | 1.71 |
| 206098_at    | ZBTB6       | 1.71 |
| 209869_at    | ADRA2A      | 1.71 |
| 1552497_a_at | SLAMF6      | 1.71 |
| 204614_at    | SERPINB2    | 1.71 |
| 213496_at    | LPPR4       | 1.71 |
| 244395_at    | FLJ41455    | 1.71 |
| 225163_at    | FRMD4A      | 1.71 |
| 219528_s_at  | BCL11B      | 1.71 |
| 220014_at    | PRR16       | 1.71 |
| 221024_s_at  | SLC2A10     | 1.71 |
| 229523_at    | TMEM200C    | 1.71 |
| 201951_at    | ALCAM       | 1.71 |
| 222538_s_at  | APPL1       | 1.71 |
| 222791_at    | RSBN1       | 1.71 |
| 229568_at    | MOB3B       | 1.71 |
| 238449_at    | LOC595101   | 1.70 |
| 1555349_a_at | ITGB2       | 1.70 |
| 217816_s_at  | PCNP        | 1.70 |
| 1556364_at   | ADAMTS9-AS2 | 1.70 |

|              |           |      |
|--------------|-----------|------|
| 228368_at    | ARHGAP20  | 1.70 |
| 206157_at    | PTX3      | 1.70 |
| 242852_at    | LOC285147 | 1.70 |
| 207606_s_at  | ARHGAP12  | 1.69 |
| 210425_x_at  | GOLGA8B   | 1.69 |
| 224583_at    | COTL1     | 1.69 |
| 222839_s_at  | PAPOLG    | 1.69 |
| 1557954_at   | TXLNG     | 1.69 |
| 213289_at    | APOOL     | 1.69 |
| 225579_at    | PQLC3     | 1.69 |
| 1554464_a_at | CRTAP     | 1.69 |
| 228618_at    | PEAR1     | 1.69 |
| 233005_at    | ZNHIT6    | 1.68 |
| 203991_s_at  | KDM6A     | 1.68 |
| 227857_at    | APMAP     | 1.68 |
| 241698_at    | RFTN2     | 1.68 |
| 215046_at    | KANSL1L   | 1.68 |
| 212850_s_at  | LRP4      | 1.68 |
| 205098_at    | CCR1      | 1.68 |
| 204646_at    | DPYD      | 1.68 |
| 232563_at    | ZNF684    | 1.68 |
| 206181_at    | SLAMF1    | 1.67 |
| 228167_at    | KLHL6     | 1.67 |
| 210839_s_at  | ENPP2     | 1.67 |
| 221039_s_at  | ASAP1     | 1.67 |
| 202957_at    | HCLS1     | 1.67 |
| 210321_at    | GZMH      | 1.67 |
| 228948_at    | EPHA4     | 1.67 |
| 223854_at    | PCDHB10   | 1.67 |
| 229222_at    | ACSS3     | 1.67 |
| 220327_at    | VGLL3     | 1.67 |
| 1552370_at   | C4orf33   | 1.67 |
| 238907_at    | ZNF780A   | 1.67 |
| 206715_at    | TFEC      | 1.67 |
| 213603_s_at  | RAC2      | 1.67 |
| 210279_at    | GPR18     | 1.67 |
| 238520_at    | TRERF1    | 1.67 |
| 232137_at    | ZNF616    | 1.67 |
| 225769_at    | COG6      | 1.67 |
| 235970_at    | LCORL     | 1.67 |
| 213566_at    | RNASE6    | 1.67 |
| 216944_s_at  | ITPR1     | 1.66 |
| 202983_at    | HLTF      | 1.66 |

|              |              |      |
|--------------|--------------|------|
| 220532_s_at  | TMEM176B     | 1.66 |
| 235226_at    | CDK19        | 1.66 |
| 205839_s_at  | BZRAP1       | 1.66 |
| 219033_at    | PARP8        | 1.66 |
| 207277_at    | CD209        | 1.66 |
| 218236_s_at  | PRKD3        | 1.66 |
| 37793_r_at   | RAD51D       | 1.66 |
| 230403_at    | RFX3         | 1.66 |
| 225992_at    | MLLT10       | 1.66 |
| 243664_at    | TXNL1        | 1.65 |
| 229234_at    | ZC3H12B      | 1.65 |
| 1569652_at   | MLLT3        | 1.65 |
| 201311_s_at  | SH3BGRL      | 1.65 |
| 212262_at    | QKI          | 1.65 |
| 244572_at    | KY           | 1.65 |
| 1553764_a_at | AJUBA        | 1.65 |
| 207861_at    | CCL22        | 1.65 |
| 203639_s_at  | FGFR2        | 1.65 |
| 229828_at    | CDC73        | 1.65 |
| 220146_at    | TLR7         | 1.65 |
| 241808_at    | ZC2HC1A      | 1.65 |
| 229309_at    | ADRB1        | 1.65 |
| 218614_at    | KIAA1551     | 1.65 |
| 213415_at    | CLIC2        | 1.65 |
| 224339_s_at  | ANGPTL1      | 1.65 |
| 223696_at    | ARSD         | 1.64 |
| 1566472_s_at | RETSAT       | 1.64 |
| 218197_s_at  | OXR1         | 1.64 |
| 242940_x_at  | DLX6         | 1.64 |
| 226932_at    | SSPN         | 1.64 |
| 34210_at     | CD52         | 1.64 |
| 209555_s_at  | CD36         | 1.64 |
| 232234_at    | SLA2         | 1.64 |
| 205234_at    | SLC16A4      | 1.64 |
| 211776_s_at  | EPB41L3      | 1.64 |
| 235304_at    | LOC100507486 | 1.64 |
| 224682_at    | ANKIB1       | 1.64 |
| 204719_at    | ABCA8        | 1.64 |
| 212558_at    | SPRY1        | 1.64 |
| 219743_at    | HEY2         | 1.64 |
| 1555600_s_at | APOL4        | 1.64 |
| 215013_s_at  | USP34        | 1.64 |
| 230783_at    | LOC283713    | 1.64 |

|              |          |      |
|--------------|----------|------|
| 223595_at    | TMEM133  | 1.64 |
| 213539_at    | CD3D     | 1.64 |
| 209357_at    | CITED2   | 1.64 |
| 218345_at    | TMEM176A | 1.64 |
| 226655_at    | STX17    | 1.63 |
| 225499_at    | RALGAPA2 | 1.63 |
| 213915_at    | NKG7     | 1.63 |
| 209821_at    | IL33     | 1.63 |
| 217257_at    | SH3BP2   | 1.63 |
| 214470_at    | KLRB1    | 1.63 |
| 228869_at    | SNX20    | 1.63 |
| 217478_s_at  | HLA-DMA  | 1.63 |
| 243747_at    | ZNF599   | 1.63 |
| 37145_at     | GPLY     | 1.63 |
| 209949_at    | NCF2     | 1.63 |
| 1563458_at   | PARVA    | 1.63 |
| 226508_at    | PHC3     | 1.63 |
| 206373_at    | ZIC1     | 1.63 |
| 203372_s_at  | SOCS2    | 1.63 |
| 218344_s_at  | RCOR3    | 1.63 |
| 204174_at    | ALOX5AP  | 1.63 |
| 212655_at    | ZCCHC14  | 1.63 |
| 206513_at    | AIM2     | 1.62 |
| 205486_at    | TESK2    | 1.62 |
| 207782_s_at  | PSEN1    | 1.62 |
| 238438_at    | CNOT6L   | 1.62 |
| 230381_at    | C1orf186 | 1.62 |
| 202765_s_at  | FBN1     | 1.62 |
| 1565162_s_at | MGST1    | 1.62 |
| 235840_at    | ZKSCAN3  | 1.62 |
| 1558346_at   | COX17    | 1.62 |
| 205624_at    | CPA3     | 1.62 |
| 202579_x_at  | HMGN4    | 1.62 |
| 214913_at    | ADAMTS3  | 1.62 |
| 1556069_s_at | HIF3A    | 1.62 |
| 235051_at    | CCDC50   | 1.62 |
| 236782_at    | SAMD3    | 1.62 |
| 236673_at    | TIFAB    | 1.62 |
| 233641_s_at  | FAM167A  | 1.62 |
| 225426_at    | PPP6C    | 1.62 |
| 215310_at    | APC      | 1.61 |
| 1556277_a_at | PAPD4    | 1.61 |
| 227553_at    | PIK3R5   | 1.61 |

|              |              |      |
|--------------|--------------|------|
| 1553718_at   | ZNF548       | 1.61 |
| 212746_s_at  | CEP170       | 1.61 |
| 219684_at    | RTP4         | 1.61 |
| 205225_at    | ESR1         | 1.61 |
| 204103_at    | CCL4         | 1.61 |
| 205859_at    | LY86         | 1.61 |
| 212704_at    | ZCCHC11      | 1.61 |
| 208893_s_at  | DUSP6        | 1.61 |
| 206618_at    | IL18R1       | 1.61 |
| 212502_at    | ADO          | 1.61 |
| 213160_at    | DOCK2        | 1.61 |
| 204042_at    | WASF3        | 1.61 |
| 203275_at    | IRF2         | 1.61 |
| 201741_x_at  | SRSF1        | 1.61 |
| 219023_at    | AP1AR        | 1.61 |
| 217989_at    | HSD17B11     | 1.61 |
| 203156_at    | AKAP11       | 1.61 |
| 201133_s_at  | PJA2         | 1.61 |
| 231558_at    | INSM1        | 1.60 |
| 226381_at    | LOC100506748 | 1.60 |
| 231779_at    | IRAK2        | 1.60 |
| 242680_at    | AVPR1A       | 1.60 |
| 232197_x_at  | ARSB         | 1.60 |
| 203199_s_at  | MTRR         | 1.60 |
| 235171_at    | LOC100505501 | 1.60 |
| 206974_at    | CXCR6        | 1.60 |
| 1561226_at   | XCR1         | 1.60 |
| 206584_at    | LY96         | 1.60 |
| 202995_s_at  | FBLN1        | 1.60 |
| 217504_at    | ABCA6        | 1.60 |
| 207375_s_at  | IL15RA       | 1.60 |
| 1559369_at   | C5orf44      | 1.60 |
| 216250_s_at  | LPXN         | 1.60 |
| 235648_at    | ZNF567       | 1.59 |
| 224797_at    | ARRDC3       | 1.59 |
| 1552670_a_at | PPP1R3B      | 1.59 |
| 223320_s_at  | ABCB10       | 1.59 |
| 202430_s_at  | PLSCR1       | 1.59 |
| 209708_at    | MOXD1        | 1.59 |
| 206589_at    | GFI1         | 1.59 |
| 222414_at    | MLL3         | 1.59 |
| 223588_at    | THAP2        | 1.59 |
| 213208_at    | KIAA0240     | 1.59 |

|              |           |      |
|--------------|-----------|------|
| 203153_at    | IFIT1     | 1.59 |
| 223343_at    | MS4A7     | 1.59 |
| 1555996_s_at | EIF4A2    | 1.59 |
| 219666_at    | MS4A6A    | 1.59 |
| 215446_s_at  | LOX       | 1.59 |
| 235160_at    | ATF7      | 1.59 |
| 229480_at    | MAGI2-AS3 | 1.59 |
| 204122_at    | TYROBP    | 1.59 |
| 228967_at    | EIF1      | 1.59 |
| 230141_at    | ARID4A    | 1.59 |
| 226366_at    | SHPRH     | 1.58 |
| 218854_at    | DSE       | 1.58 |
| 219895_at    | FAM70A    | 1.58 |
| 226344_at    | ZMAT1     | 1.58 |
| 207068_at    | ZFP37     | 1.58 |
| 227025_at    | PPHLN1    | 1.58 |
| 222496_s_at  | RBM47     | 1.58 |
| 219694_at    | FAM105A   | 1.58 |
| 205220_at    | HCAR3     | 1.58 |
| 203645_s_at  | CD163     | 1.58 |
| 239651_at    | ANAPC5    | 1.58 |
| 1555812_a_at | ARHGDIB   | 1.58 |
| 226908_at    | LRIG3     | 1.58 |
| 212956_at    | TBC1D9    | 1.58 |
| 229560_at    | TLR8      | 1.58 |
| 231610_at    | TTBK2     | 1.58 |
| 204176_at    | KLHL20    | 1.58 |
| 205307_s_at  | KMO       | 1.58 |
| 229618_at    | SNX16     | 1.58 |
| 213596_at    | CASP4     | 1.58 |
| 208666_s_at  | ST13      | 1.58 |
| 238678_at    | FLJ45340  | 1.58 |
| 219161_s_at  | CKLF      | 1.58 |
| 217777_s_at  | PTPLAD1   | 1.58 |
| 209582_s_at  | CD200     | 1.57 |
| 235155_at    | BDH2      | 1.57 |
| 205407_at    | RECK      | 1.57 |
| 215493_x_at  | BTN2A1    | 1.57 |
| 242979_at    | IRS1      | 1.57 |
| 212277_at    | MTMR4     | 1.57 |
| 213170_at    | GPX7      | 1.57 |
| 214146_s_at  | PPBP      | 1.57 |
| 210354_at    | IFNG      | 1.57 |



|              |              |      |
|--------------|--------------|------|
| 226181_at    | TUBE1        | 1.57 |
| 224600_at    | CGGBP1       | 1.57 |
| 206519_x_at  | SIGLEC6      | 1.57 |
| 212672_at    | ATM          | 1.57 |
| 207431_s_at  | DEGS1        | 1.56 |
| 226358_at    | APH1B        | 1.56 |
| 208450_at    | LGALS2       | 1.56 |
| 212820_at    | DMXL2        | 1.56 |
| 205191_at    | RP2          | 1.56 |
| 218486_at    | KLF11        | 1.56 |
| 225931_s_at  | RNF213       | 1.56 |
| 241399_at    | FAM19A2      | 1.56 |
| 224701_at    | PARP14       | 1.56 |
| 205127_at    | PTGS1        | 1.56 |
| 226799_at    | FGD6         | 1.56 |
| 227475_at    | FOXQ1        | 1.56 |
| 230413_s_at  | AP1S2        | 1.56 |
| 242521_at    | LOC100505812 | 1.56 |
| 44790_s_at   | KIAA0226L    | 1.56 |
| 204032_at    | BCAR3        | 1.56 |
| 224865_at    | FAR1         | 1.56 |
| 221556_at    | CDC14B       | 1.56 |
| 230158_at    | DPY19L2      | 1.56 |
| 217915_s_at  | RSL24D1      | 1.56 |
| 243370_at    | CAPRIN1      | 1.56 |
| 227722_at    | RPS23        | 1.55 |
| 212486_s_at  | FYN          | 1.55 |
| 220992_s_at  | TRMT1L       | 1.55 |
| 205421_at    | SLC22A3      | 1.55 |
| 214070_s_at  | ATP10B       | 1.55 |
| 1556300_s_at | SIM1         | 1.55 |
| 206170_at    | ADRB2        | 1.55 |
| 217104_at    | ST20         | 1.55 |
| 212530_at    | NEK7         | 1.55 |
| 227226_at    | MRAP2        | 1.55 |
| 201455_s_at  | NPEPPS       | 1.55 |
| 1553150_at   | KDM1B        | 1.55 |
| 202181_at    | KIAA0247     | 1.55 |
| 222279_at    | HLA-F-AS1    | 1.55 |
| 214732_at    | SP1          | 1.55 |
| 205433_at    | BCHE         | 1.55 |
| 206682_at    | CLEC10A      | 1.54 |
| 236539_at    | PTPN22       | 1.54 |

|              |           |      |
|--------------|-----------|------|
| 212598_at    | WDFY3     | 1.54 |
| 226251_at    | ASXL2     | 1.54 |
| 215743_at    | NMT2      | 1.54 |
| 1559490_at   | LRCH3     | 1.54 |
| 238453_at    | FGFBP3    | 1.54 |
| 226878_at    | HLA-DOA   | 1.54 |
| 220770_s_at  | C5orf54   | 1.54 |
| 209892_at    | FUT4      | 1.54 |
| 206765_at    | KCNJ2     | 1.54 |
| 202377_at    | LEPROT    | 1.54 |
| 235450_at    | FBXL4     | 1.54 |
| 219599_at    | EIF4B     | 1.54 |
| 238581_at    | GBP5      | 1.54 |
| 221231_s_at  | C14orf102 | 1.54 |
| 212764_at    | ZEB1      | 1.54 |
| 214162_at    | LOC284244 | 1.54 |
| 227425_at    | REPS2     | 1.53 |
| 221823_at    | C5orf30   | 1.53 |
| 227428_at    | GABPA     | 1.53 |
| 204451_at    | FZD1      | 1.53 |
| 211089_s_at  | NEK3      | 1.53 |
| 203799_at    | CD302     | 1.53 |
| 224965_at    | GNG2      | 1.53 |
| 206159_at    | GDF10     | 1.53 |
| 207181_s_at  | CASP7     | 1.53 |
| 1556770_a_at | FBXL13    | 1.53 |
| 212408_at    | TOR1AIP1  | 1.53 |
| 201653_at    | CNIH      | 1.53 |
| 235520_at    | ZNF280C   | 1.53 |
| 1553906_s_at | FGD2      | 1.53 |
| 233241_at    | PLK1S1    | 1.53 |
| 228728_at    | CPED1     | 1.53 |
| 225872_at    | SLC35F5   | 1.53 |
| 229067_at    | SRGAP2C   | 1.53 |
| 209969_s_at  | STAT1     | 1.53 |
| 1554062_at   | XG        | 1.53 |
| 211548_s_at  | HPGD      | 1.53 |
| 215023_s_at  | PEX1      | 1.53 |
| 210135_s_at  | SHOX2     | 1.53 |
| 215307_at    | ZNF529    | 1.53 |
| 226326_at    | PCGF5     | 1.53 |
| 222659_at    | IPO11     | 1.52 |
| 227351_at    | C16orf52  | 1.52 |

|              |              |      |
|--------------|--------------|------|
| 202510_s_at  | TNFAIP2      | 1.52 |
| 204114_at    | NID2         | 1.52 |
| 210355_at    | PTHLH        | 1.52 |
| 221950_at    | EMX2         | 1.52 |
| 226884_at    | LRRN1        | 1.52 |
| 226741_at    | SLC12A6      | 1.52 |
| 202073_at    | OPTN         | 1.52 |
| 236244_at    | HNRNPU       | 1.52 |
| 210340_s_at  | CSF2RA       | 1.52 |
| 228788_at    | YPEL1        | 1.52 |
| 214581_x_at  | TNFRSF21     | 1.52 |
| 201422_at    | IFI30        | 1.52 |
| 204172_at    | CPOX         | 1.52 |
| 225207_at    | PDK4         | 1.52 |
| 205590_at    | RASGRP1      | 1.52 |
| 227210_at    | SFMBT2       | 1.52 |
| 231975_s_at  | MIER3        | 1.52 |
| 212067_s_at  | C1R          | 1.52 |
| 202026_at    | SDHD         | 1.52 |
| 1555858_at   | LOC440944    | 1.52 |
| 219940_s_at  | PCID2        | 1.52 |
| 207339_s_at  | LTB          | 1.52 |
| 235537_at    | OCIAD1       | 1.52 |
| 238081_at    | WDFY3-AS2    | 1.52 |
| 218769_s_at  | ANKRA2       | 1.51 |
| 212406_s_at  | PCMTD2       | 1.51 |
| 235885_at    | P2RY12       | 1.51 |
| 227171_at    | CCT4         | 1.51 |
| 209546_s_at  | APOL1        | 1.51 |
| 204591_at    | CHL1         | 1.51 |
| 213974_at    | ADAMTSL3     | 1.51 |
| 221757_at    | PIK3IP1      | 1.51 |
| 220350_at    | ZNF235       | 1.51 |
| 213605_s_at  | LOC728093    | 1.51 |
| 235151_at    | LOC283357    | 1.51 |
| 239237_at    | LOC100506776 | 1.51 |
| 219209_at    | IFIH1        | 1.51 |
| 205498_at    | GHR          | 1.51 |
| 218918_at    | MAN1C1       | 1.51 |
| 203097_s_at  | RAPGEF2      | 1.51 |
| 1556116_s_at | TNPO1        | 1.51 |
| 239843_at    | RIT1         | 1.51 |
| 228010_at    | PPP2R2C      | 1.51 |

|              |               |      |
|--------------|---------------|------|
| 209687_at    | CXCL12        | 1.51 |
| 213095_x_at  | AIF1          | 1.51 |
| 208018_s_at  | HCK           | 1.51 |
| 211958_at    | IGFBP5        | 1.51 |
| 238923_at    | SPOP          | 1.51 |
| 234888_at    | CACHD1        | 1.51 |
| 201218_at    | CTBP2         | 1.51 |
| 218311_at    | MAP4K3        | 1.51 |
| 202171_at    | VEZF1         | 1.51 |
| 229969_at    | SEC63         | 1.51 |
| 230780_at    | LOC730091     | 1.51 |
| 1564276_at   | C5orf56       | 1.50 |
| 209168_at    | GPM6B         | 1.50 |
| 222938_x_at  | ENPP3         | 1.50 |
| 205051_s_at  | KIT           | 1.50 |
| 231993_at    | ITGBL1        | 1.50 |
| 221965_at    | MPHOSPH9      | 1.50 |
| 222218_s_at  | PILRA         | 1.50 |
| 222572_at    | PDP1          | 1.50 |
| 222075_s_at  | OAZ3          | 0.67 |
| 1555677_s_at | SMC1A         | 0.67 |
| 223894_s_at  | AKTIP         | 0.67 |
| 218488_at    | EIF2B3        | 0.67 |
| 226355_at    | POC1A         | 0.67 |
| 239319_at    | LOC728342     | 0.67 |
| 202041_s_at  | FIBP          | 0.67 |
| 229119_s_at  | ZSWIM7        | 0.67 |
| 212123_at    | TCTN3         | 0.67 |
| 206653_at    | POLR3G        | 0.67 |
| 202570_s_at  | DLGAP4        | 0.66 |
| 213546_at    | DKFZP586I1420 | 0.66 |
| 220021_at    | TMC7          | 0.66 |
| 219944_at    | CLIP4         | 0.66 |
| 219693_at    | AGPAT4        | 0.66 |
| 229900_at    | CD109         | 0.66 |
| 219395_at    | ESRP2         | 0.66 |
| 227844_at    | FMNL3         | 0.66 |
| 202870_s_at  | CDC20         | 0.66 |
| 200643_at    | HDLBP         | 0.66 |
| 40850_at     | FKBP8         | 0.66 |
| 229635_at    | LOC100505702  | 0.66 |
| 227410_at    | FAM43A        | 0.66 |
| 204328_at    | TMC6          | 0.66 |

|              |           |      |
|--------------|-----------|------|
| 220244_at    | LINC00312 | 0.66 |
| 225496_s_at  | SYTL2     | 0.66 |
| 213571_s_at  | EIF4E2    | 0.66 |
| 208297_s_at  | EVI5      | 0.66 |
| 208932_at    | PPP4C     | 0.66 |
| 230362_at    | INPP5F    | 0.66 |
| 222810_s_at  | RASAL2    | 0.66 |
| 200601_at    | ACTN4     | 0.66 |
| 210480_s_at  | MYO6      | 0.66 |
| 214752_x_at  | FLNA      | 0.66 |
| 213067_at    | MYH10     | 0.66 |
| 227477_at    | ZMYND19   | 0.66 |
| 224898_at    | WDR26     | 0.66 |
| 223701_s_at  | USP47     | 0.66 |
| 207865_s_at  | BMP8B     | 0.66 |
| 220203_at    | BMP8A     | 0.66 |
| 206312_at    | GUCY2C    | 0.66 |
| 203727_at    | SKIV2L    | 0.66 |
| 202756_s_at  | GPC1      | 0.66 |
| 213899_at    | METAP2    | 0.66 |
| 242624_at    | ABLIM2    | 0.66 |
| 205423_at    | AP1B1     | 0.66 |
| 207321_s_at  | ABCB9     | 0.66 |
| 235536_at    | SNORD89   | 0.66 |
| 241436_at    | SCNN1G    | 0.66 |
| 213008_at    | FANCI     | 0.66 |
| 201291_s_at  | TOP2A     | 0.66 |
| 206034_at    | SERPINB8  | 0.66 |
| 239196_at    | ANKRD22   | 0.66 |
| 225788_at    | RRP36     | 0.66 |
| 235086_at    | THBS1     | 0.66 |
| 204616_at    | UCHL3     | 0.66 |
| 221063_x_at  | RNF123    | 0.66 |
| 203382_s_at  | APOE      | 0.66 |
| 1552314_a_at | EYA3      | 0.66 |
| 1554049_s_at | DCAF8     | 0.66 |
| 232074_at    | PRSS27    | 0.66 |
| 229936_at    | GFRA3     | 0.65 |
| 205138_s_at  | UST       | 0.65 |
| 227060_at    | RELT      | 0.65 |
| 205268_s_at  | ADD2      | 0.65 |
| 213822_s_at  | UBE3B     | 0.65 |
| 219842_at    | ARL15     | 0.65 |

|              |          |      |
|--------------|----------|------|
| 204840_s_at  | EEA1     | 0.65 |
| 235948_at    | RIMKLA   | 0.65 |
| 208676_s_at  | PA2G4    | 0.65 |
| 210020_x_at  | CALML3   | 0.65 |
| 227898_s_at  | ZFP41    | 0.65 |
| 200710_at    | ACADVL   | 0.65 |
| 207390_s_at  | SMTN     | 0.65 |
| 218360_at    | RAB22A   | 0.65 |
| 204454_at    | LDOC1    | 0.65 |
| 211564_s_at  | PDLIM4   | 0.65 |
| 201911_s_at  | FARP1    | 0.65 |
| 214374_s_at  | PPFIBP1  | 0.65 |
| 212374_at    | FEM1B    | 0.65 |
| 208555_x_at  | CST2     | 0.65 |
| 225591_at    | FBXO25   | 0.65 |
| 217933_s_at  | LAP3     | 0.65 |
| 1569064_at   | C15orf62 | 0.65 |
| 1569868_s_at | EME2     | 0.65 |
| 226615_at    | XPR1     | 0.65 |
| 226697_at    | FAM114A1 | 0.65 |
| 235998_at    | RHPN1    | 0.65 |
| 200598_s_at  | HSP90B1  | 0.65 |
| 235709_at    | GAS2L3   | 0.65 |
| 212878_s_at  | KLC1     | 0.65 |
| 221005_s_at  | PTDSS2   | 0.65 |
| 238528_at    | UBR1     | 0.65 |
| 225955_at    | METRNL   | 0.65 |
| 202107_s_at  | MCM2     | 0.65 |
| 202806_at    | DBN1     | 0.65 |
| 1554333_at   | DNAJA4   | 0.65 |
| 223682_s_at  | EIF1AD   | 0.65 |
| 214324_at    | GP2      | 0.65 |
| 202109_at    | ARFIP2   | 0.65 |
| 214337_at    | COPA     | 0.65 |
| 203634_s_at  | CPT1A    | 0.65 |
| 227318_at    | TMEM178B | 0.65 |
| 222240_s_at  | ISYNA1   | 0.65 |
| 221713_s_at  | MAP6D1   | 0.65 |
| 209912_s_at  | AP5Z1    | 0.65 |
| 218489_s_at  | ALAD     | 0.65 |
| 227880_s_at  | TMEM185A | 0.65 |
| 223419_at    | FBXW9    | 0.65 |
| 222348_at    | MAST4    | 0.65 |

|              |           |      |
|--------------|-----------|------|
| 209848_s_at  | PMEL      | 0.65 |
| 219904_at    | ZSCAN5A   | 0.65 |
| 231928_at    | HES2      | 0.65 |
| 244889_at    | LOC388210 | 0.65 |
| 205521_at    | EXOG      | 0.65 |
| 1552296_at   | BEST4     | 0.65 |
| 203722_at    | ALDH4A1   | 0.65 |
| 221585_at    | CACNG4    | 0.65 |
| 202714_s_at  | KIAA0391  | 0.65 |
| 232270_at    | C9orf3    | 0.65 |
| 219084_at    | NSD1      | 0.65 |
| 202356_s_at  | GTF2F1    | 0.65 |
| 208190_s_at  | LSR       | 0.64 |
| 221521_s_at  | GINS2     | 0.64 |
| 228236_at    | SLC52A3   | 0.64 |
| 227217_at    | WNK2      | 0.64 |
| 238460_at    | FAM83A    | 0.64 |
| 206277_at    | P2RY2     | 0.64 |
| 226359_at    | GTPBP1    | 0.64 |
| 1552578_a_at | MYO3B     | 0.64 |
| 216212_s_at  | DKC1      | 0.64 |
| 215235_at    | SPTAN1    | 0.64 |
| 221981_s_at  | WDR59     | 0.64 |
| 203263_s_at  | ARHGEF9   | 0.64 |
| 210428_s_at  | HGS       | 0.64 |
| 225794_s_at  | C22orf32  | 0.64 |
| 226313_at    | C10orf35  | 0.64 |
| 204608_at    | ASL       | 0.64 |
| 230674_at    | LGR4      | 0.64 |
| 219560_at    | C22orf29  | 0.64 |
| 225301_s_at  | MYO5B     | 0.64 |
| 219555_s_at  | CENPN     | 0.64 |
| 219358_s_at  | ADAP2     | 0.64 |
| 1559399_s_at | ZCCHC10   | 0.64 |
| 233167_at    | SELO      | 0.64 |
| 202315_s_at  | BCR       | 0.64 |
| 226009_at    | DPCD      | 0.64 |
| 229380_at    | ILDR2     | 0.64 |
| 223518_at    | DFFA      | 0.64 |
| 1558173_a_at | LUZP1     | 0.64 |
| 202391_at    | BASP1     | 0.64 |
| 224987_at    | C6orf89   | 0.64 |
| 204378_at    | BCAS1     | 0.64 |

|              |              |      |
|--------------|--------------|------|
| 201353_s_at  | BAZ2A        | 0.64 |
| 1569659_at   | LOC100506895 | 0.64 |
| 238594_x_at  | DUSP8        | 0.64 |
| 202580_x_at  | FOXM1        | 0.64 |
| 208998_at    | UCP2         | 0.64 |
| 1557165_s_at | KLHL18       | 0.64 |
| 205164_at    | GCAT         | 0.64 |
| 212563_at    | BOP1         | 0.64 |
| 211846_s_at  | PVRL1        | 0.64 |
| 240233_at    | LOC100506714 | 0.64 |
| 212983_at    | HRAS         | 0.64 |
| 242283_at    | DNAH14       | 0.64 |
| 228922_at    | SHF          | 0.64 |
| 202924_s_at  | PLAGL2       | 0.64 |
| 208693_s_at  | GARS         | 0.64 |
| 218874_s_at  | ATAT1        | 0.64 |
| 222245_s_at  | FER1L4       | 0.64 |
| 225193_at    | KIAA1967     | 0.64 |
| 225096_at    | C17orf79     | 0.64 |
| 202461_at    | EIF2B2       | 0.64 |
| 219916_s_at  | RNF39        | 0.64 |
| 217785_s_at  | YKT6         | 0.64 |
| 202705_at    | CCNB2        | 0.64 |
| 211531_x_at  | PRB1         | 0.64 |
| 226027_at    | SWI5         | 0.64 |
| 203201_at    | PMM2         | 0.64 |
| 209667_at    | CES2         | 0.64 |
| 203903_s_at  | HEPH         | 0.64 |
| 1552803_a_at | STMN1        | 0.64 |
| 205348_s_at  | DYNC111      | 0.64 |
| 231406_at    | ORAI2        | 0.64 |
| 232203_at    | NKD1         | 0.64 |
| 213467_at    | RND2         | 0.64 |
| 209495_at    | CEP250       | 0.63 |
| 216555_at    | PRR14L       | 0.63 |
| 229494_s_at  | PHLDA2       | 0.63 |
| 231233_at    | KDM5B-AS1    | 0.63 |
| 242729_at    | TTN-AS1      | 0.63 |
| 38710_at     | OTUB1        | 0.63 |
| 204256_at    | ELOVL6       | 0.63 |
| 218619_s_at  | SUV39H1      | 0.63 |
| 1557136_at   | ATP13A4      | 0.63 |
| 242722_at    | LMO7         | 0.63 |



|             |              |      |
|-------------|--------------|------|
| 1569044_at  | CDC42BPG     | 0.63 |
| 1553226_at  | LINC00052    | 0.63 |
| 1552389_at  | C8orf47      | 0.63 |
| 219752_at   | RASAL1       | 0.63 |
| 213096_at   | TMCC2        | 0.63 |
| 209679_s_at | SMAGP        | 0.63 |
| 224227_s_at | BDP1         | 0.63 |
| 204879_at   | PDPN         | 0.63 |
| 203235_at   | THOP1        | 0.63 |
| 220482_s_at | SERGEF       | 0.63 |
| 205864_at   | SLC7A4       | 0.63 |
| 205796_at   | TCP11L1      | 0.63 |
| 229405_at   | KIF7         | 0.63 |
| 205375_at   | MDFI         | 0.63 |
| 228587_at   | FAM83G       | 0.63 |
| 1553211_at  | ANKFN1       | 0.63 |
| 227437_at   | LOC100506668 | 0.63 |
| 225682_s_at | POLR3H       | 0.63 |
| 232322_x_at | STARD10      | 0.63 |
| 219722_s_at | GDPD3        | 0.63 |
| 225751_at   | RBM17        | 0.63 |
| 223346_at   | VPS18        | 0.63 |
| 208637_x_at | ACTN1        | 0.63 |
| 204958_at   | PLK3         | 0.63 |
| 207525_s_at | GIPC1        | 0.63 |
| 201797_s_at | VAR5         | 0.63 |
| 2028_s_at   | E2F1         | 0.62 |
| 205145_s_at | MYL5         | 0.62 |
| 205436_s_at | H2AFX        | 0.62 |
| 203668_at   | MAN2C1       | 0.62 |
| 229581_at   | ELFN1        | 0.62 |
| 55065_at    | MARK4        | 0.62 |
| 229933_at   | C1orf74      | 0.62 |
| 218257_s_at | UGGT1        | 0.62 |
| 238909_at   | S100A10      | 0.62 |
| 235461_at   | TET2         | 0.62 |
| 220308_at   | CCDC19       | 0.62 |
| 205547_s_at | TAGLN        | 0.62 |
| 223919_at   | TP53AIP1     | 0.62 |
| 230104_s_at | TPPP         | 0.62 |
| 235852_at   | STON2        | 0.62 |
| 1564231_at  | IFT80        | 0.62 |
| 38340_at    | HIP1R        | 0.62 |

|              |          |      |
|--------------|----------|------|
| 219785_s_at  | FBXO31   | 0.62 |
| 226828_s_at  | HEYL     | 0.62 |
| 210081_at    | AGER     | 0.62 |
| 227283_at    | EFR3B    | 0.62 |
| 221779_at    | MICALL1  | 0.62 |
| 215714_s_at  | SMARCA4  | 0.62 |
| 229004_at    | ADAMTS15 | 0.62 |
| 238703_at    | FAM207A  | 0.62 |
| 204284_at    | PPP1R3C  | 0.62 |
| 217080_s_at  | HOMER2   | 0.62 |
| 213270_at    | MPP2     | 0.62 |
| 222622_at    | PGP      | 0.62 |
| 1554469_at   | ZBTB44   | 0.62 |
| 1552755_at   | C9orf66  | 0.62 |
| 231230_at    | KCNK10   | 0.62 |
| 1568617_a_at | CAMSAP3  | 0.62 |
| 226373_at    | SFXN5    | 0.62 |
| 220620_at    | CRCT1    | 0.62 |
| 1553023_a_at | NOX5     | 0.62 |
| 238028_at    | C6orf132 | 0.62 |
| 212570_at    | ENDOD1   | 0.62 |
| 1569787_at   | RFTN1    | 0.62 |
| 204745_x_at  | MT1G     | 0.62 |
| 230847_at    | WRNIP1   | 0.62 |
| 227744_s_at  | HNRNPD   | 0.61 |
| 223078_s_at  | TMOD3    | 0.61 |
| 205592_at    | SLC4A1   | 0.61 |
| 201149_s_at  | TIMP3    | 0.61 |
| 210065_s_at  | UPK1B    | 0.61 |
| 203612_at    | BYSL     | 0.61 |
| 240288_at    | KCNRG    | 0.61 |
| 227672_at    | C8orf73  | 0.61 |
| 210689_at    | CLDN14   | 0.61 |
| 1554804_a_at | CLDN19   | 0.61 |
| 31846_at     | RHOD     | 0.61 |
| 214657_s_at  | NEAT1    | 0.61 |
| 222783_s_at  | SMOC1    | 0.61 |
| 227069_at    | CUX1     | 0.61 |
| 243362_s_at  | LEF1-AS1 | 0.61 |
| 215471_s_at  | MAP7     | 0.61 |
| 1552618_at   | STX6     | 0.61 |
| 214073_at    | CTTN     | 0.61 |
| 221389_at    | PLA2G2E  | 0.61 |

|              |              |      |
|--------------|--------------|------|
| 218376_s_at  | MICAL1       | 0.61 |
| 225317_at    | ACBD6        | 0.61 |
| 200611_s_at  | WDR1         | 0.61 |
| 235683_at    | SESN3        | 0.61 |
| 206315_at    | CRLF1        | 0.61 |
| 230092_at    | UBXN10       | 0.61 |
| 220953_s_at  | MTMR12       | 0.61 |
| 210357_s_at  | SMOX         | 0.61 |
| 203004_s_at  | MEF2D        | 0.61 |
| 205214_at    | STK17B       | 0.61 |
| 209945_s_at  | GSK3B        | 0.61 |
| 238625_at    | C1orf168     | 0.61 |
| 212154_at    | SDC2         | 0.61 |
| 229854_at    | OBSCN        | 0.61 |
| 228274_at    | SDSL         | 0.61 |
| 1563796_s_at | EARS2        | 0.61 |
| 222671_s_at  | JMJD4        | 0.61 |
| 219844_at    | C10orf118    | 0.60 |
| 212810_s_at  | SLC1A4       | 0.60 |
| 209922_at    | BRAP         | 0.60 |
| 219271_at    | GALNT14      | 0.60 |
| 222222_s_at  | HOMER3       | 0.60 |
| 205918_at    | SLC4A3       | 0.60 |
| 210609_s_at  | TP53I3       | 0.60 |
| 1554038_at   | LARP1B       | 0.60 |
| 239061_at    | TPRXL        | 0.60 |
| 200720_s_at  | ACTR1A       | 0.60 |
| 218961_s_at  | PNKP         | 0.60 |
| 210624_s_at  | ILVBL        | 0.60 |
| 202525_at    | PRSS8        | 0.60 |
| 233208_x_at  | CPSF2        | 0.60 |
| 204736_s_at  | CSPG4        | 0.60 |
| 202005_at    | ST14         | 0.60 |
| 1558281_a_at | TMEM184A     | 0.60 |
| 239263_at    | LOC100506813 | 0.60 |
| 218960_at    | TMPRSS4      | 0.60 |
| 201516_at    | SRM          | 0.60 |
| 239174_at    | LOC100505912 | 0.60 |
| 210021_s_at  | CCNO         | 0.60 |
| 217150_s_at  | NF2          | 0.60 |
| 201861_s_at  | LRRFIP1      | 0.60 |
| 219976_at    | HOOK1        | 0.60 |
| 212834_at    | DDX52        | 0.60 |

|              |              |      |
|--------------|--------------|------|
| 37408_at     | MRC2         | 0.60 |
| 218906_x_at  | KLC2         | 0.60 |
| 228068_at    | GOLGA7B      | 0.60 |
| 1554095_at   | RBM33        | 0.60 |
| 238636_at    | CACNA1C      | 0.60 |
| 1560068_a_at | LOC729870    | 0.60 |
| 237169_at    | TNC          | 0.60 |
| 218872_at    | TESC         | 0.60 |
| 65635_at     | ENGASE       | 0.60 |
| 229084_at    | CNTN4        | 0.60 |
| 1558050_at   | EIF2B5       | 0.60 |
| 206828_at    | TXK          | 0.60 |
| 239707_at    | SLC5A10      | 0.60 |
| 208622_s_at  | EZR          | 0.60 |
| 214763_at    | ACOT11       | 0.60 |
| 208002_s_at  | ACOT7        | 0.59 |
| 217930_s_at  | TOLLIP       | 0.59 |
| 219194_at    | SEMA4G       | 0.59 |
| 204857_at    | MAD1L1       | 0.59 |
| 209037_s_at  | EHD1         | 0.59 |
| 219806_s_at  | C11orf75     | 0.59 |
| 1553672_at   | ENAH         | 0.59 |
| 1556308_at   | PRRT3        | 0.59 |
| 203367_at    | DUSP14       | 0.59 |
| 224097_s_at  | F11R         | 0.59 |
| 1554701_a_at | TBC1D16      | 0.59 |
| 232069_at    | KIF26A       | 0.59 |
| 228515_at    | LOC90784     | 0.59 |
| 216804_s_at  | PDLIM5       | 0.59 |
| 226584_s_at  | FAM110A      | 0.59 |
| 227506_at    | SLC16A9      | 0.59 |
| 202198_s_at  | MTMR3        | 0.59 |
| 226661_at    | CDCA2        | 0.59 |
| 219529_at    | CLIC3        | 0.59 |
| 228900_at    | SPECC1       | 0.59 |
| 211702_s_at  | USP32        | 0.59 |
| 225249_at    | SPPL2B       | 0.59 |
| 225160_x_at  | MDM2         | 0.59 |
| 203027_s_at  | MVD          | 0.59 |
| 222435_s_at  | UBE2J1       | 0.59 |
| 223471_at    | RAB3IP       | 0.59 |
| 232300_at    | LOC100133190 | 0.59 |
| 214838_at    | SFT2D2       | 0.59 |

|              |           |      |
|--------------|-----------|------|
| 228176_at    | S1PR3     | 0.59 |
| 200924_s_at  | SLC3A2    | 0.59 |
| 222874_s_at  | CLN8      | 0.59 |
| 206858_s_at  | HOXC6     | 0.59 |
| 229275_at    | IGFN1     | 0.59 |
| 217924_at    | C6orf106  | 0.59 |
| 228303_at    | GALNT6    | 0.59 |
| 214490_at    | ARSF      | 0.58 |
| 228996_at    | RC3H1     | 0.58 |
| 203287_at    | LAD1      | 0.58 |
| 219229_at    | SLCO3A1   | 0.58 |
| 1553352_x_at | ERVW-1    | 0.58 |
| 227174_at    | WDR72     | 0.58 |
| 231609_at    | C10orf82  | 0.58 |
| 1570156_s_at | FMN1      | 0.58 |
| 228235_at    | MGC16121  | 0.58 |
| 209442_x_at  | ANK3      | 0.58 |
| 212915_at    | PDZRN3    | 0.58 |
| 229715_at    | NCR3LG1   | 0.58 |
| 204657_s_at  | SHB       | 0.58 |
| 233123_at    | SLC40A1   | 0.58 |
| 201050_at    | PLD3      | 0.58 |
| 1553785_at   | RASGEF1B  | 0.58 |
| 228360_at    | LYPD6B    | 0.58 |
| 1554821_a_at | ZBED1     | 0.58 |
| 203842_s_at  | MAPRE3    | 0.58 |
| 1555783_x_at | PQLC2     | 0.58 |
| 205872_x_at  | PDE4DIP   | 0.58 |
| 212807_s_at  | SORT1     | 0.58 |
| 205406_s_at  | SPA17     | 0.58 |
| 235095_at    | CCDC64B   | 0.58 |
| 203707_at    | ZNF263    | 0.58 |
| 237981_at    | CMYA5     | 0.58 |
| 237423_at    | RSPO4     | 0.58 |
| 243955_at    | LOC388820 | 0.57 |
| 216222_s_at  | MYO10     | 0.57 |
| 230976_at    | AK8       | 0.57 |
| 225258_at    | FBLIM1    | 0.57 |
| 206044_s_at  | BRAF      | 0.57 |
| 226535_at    | ITGB6     | 0.57 |
| 202402_s_at  | CARS      | 0.57 |
| 215547_at    | TSC22D2   | 0.57 |
| 201043_s_at  | ANP32A    | 0.57 |

|             |           |      |
|-------------|-----------|------|
| 205948_at   | PTPRT     | 0.57 |
| 223461_at   | TBC1D7    | 0.57 |
| 1553710_at  | FAM218A   | 0.57 |
| 212686_at   | PPM1H     | 0.57 |
| 239569_at   | FLJ31485  | 0.57 |
| 202275_at   | G6PD      | 0.57 |
| 211538_s_at | HSPA2     | 0.57 |
| 202895_s_at | SIRPA     | 0.57 |
| 204556_s_at | DZIP1     | 0.57 |
| 214433_s_at | SELENBP1  | 0.57 |
| 206472_s_at | TLE3      | 0.57 |
| 220193_at   | SH3D21    | 0.57 |
| 230144_at   | GRIA3     | 0.57 |
| 204420_at   | FOSL1     | 0.57 |
| 234925_at   | LOC732275 | 0.57 |
| 200906_s_at | PALLD     | 0.56 |
| 229929_at   | SPSB4     | 0.56 |
| 209589_s_at | EPHB2     | 0.56 |
| 213793_s_at | HOMER1    | 0.56 |
| 218876_at   | TPPP3     | 0.56 |
| 213385_at   | CHN2      | 0.56 |
| 223468_s_at | RGMA      | 0.56 |
| 217966_s_at | FAM129A   | 0.56 |
| 213607_x_at | NADK      | 0.56 |
| 204730_at   | RIMS3     | 0.56 |
| 203160_s_at | RNF8      | 0.56 |
| 229163_at   | CAMK2N1   | 0.56 |
| 243209_at   | KCNQ4     | 0.56 |
| 213358_at   | SOGA2     | 0.56 |
| 213030_s_at | PLXNA2    | 0.56 |
| 226187_at   | CDS1      | 0.56 |
| 224008_s_at | KCNK7     | 0.56 |
| 236263_at   | SHH       | 0.55 |
| 229518_at   | FAM46B    | 0.55 |
| 201481_s_at | PYGB      | 0.55 |
| 208653_s_at | CD164     | 0.55 |
| 228720_at   | SORCS2    | 0.55 |
| 236275_at   | KRBA1     | 0.55 |
| 210402_at   | KCNJ1     | 0.55 |
| 219554_at   | RHCG      | 0.55 |
| 236926_at   | TBX1      | 0.55 |
| 207144_s_at | CITED1    | 0.55 |
| 209696_at   | FBP1      | 0.55 |

|              |              |      |
|--------------|--------------|------|
| 206758_at    | EDN2         | 0.55 |
| 219478_at    | WFDC1        | 0.55 |
| 223575_at    | KIAA1549     | 0.55 |
| 228486_at    | SLC44A1      | 0.55 |
| 206046_at    | ADAM23       | 0.54 |
| 229892_at    | EP400NL      | 0.54 |
| 220245_at    | SLC45A2      | 0.54 |
| 228473_at    | MSX1         | 0.54 |
| 211071_s_at  | MLLT11       | 0.54 |
| 222027_at    | NUCKS1       | 0.54 |
| 206623_at    | PDE6A        | 0.54 |
| 220317_at    | LRAT         | 0.54 |
| 215729_s_at  | VGLL1        | 0.54 |
| 219511_s_at  | SNCAIP       | 0.54 |
| 229909_at    | B4GALNT3     | 0.54 |
| 230498_at    | MCHR1        | 0.54 |
| 230469_at    | RTKN2        | 0.54 |
| 209438_at    | PHKA2        | 0.54 |
| 36829_at     | PER1         | 0.54 |
| 228262_at    | MAP7D2       | 0.54 |
| 217395_at    | MT4          | 0.54 |
| 203827_at    | WIPI1        | 0.53 |
| 33767_at     | NEFH         | 0.53 |
| 209698_at    | CCHCR1       | 0.53 |
| 237899_at    | LOC100506374 | 0.53 |
| 223427_s_at  | EPB41L4B     | 0.53 |
| 200744_s_at  | GNB1         | 0.53 |
| 204157_s_at  | SIK3         | 0.53 |
| 215779_s_at  | HIST1H2BG    | 0.53 |
| 1553388_at   | FAM26D       | 0.53 |
| 221031_s_at  | APOLD1       | 0.53 |
| 222871_at    | KLHDC8A      | 0.53 |
| 235479_at    | CPEB2        | 0.53 |
| 1552496_a_at | COBL         | 0.53 |
| 231371_at    | TDRD10       | 0.53 |
| 220795_s_at  | BEGAIN       | 0.53 |
| 234978_at    | SLC36A4      | 0.53 |
| 206132_at    | MCC          | 0.52 |
| 230087_at    | PRIMA1       | 0.52 |
| 221114_at    | AMBN         | 0.52 |
| 206912_at    | FOXO1        | 0.52 |
| 225142_at    | JHDM1D       | 0.52 |
| 229160_at    | MUM1L1       | 0.52 |

|              |              |      |
|--------------|--------------|------|
| 229596_at    | AMDHD1       | 0.52 |
| 212479_s_at  | RMND5A       | 0.52 |
| 242660_at    | C10orf112    | 0.52 |
| 210048_at    | NAPG         | 0.52 |
| 1555007_s_at | WDR66        | 0.52 |
| 207192_at    | DNASE1L2     | 0.51 |
| 205125_at    | PLCD1        | 0.51 |
| 204682_at    | LTBP2        | 0.51 |
| 203650_at    | PROCR        | 0.51 |
| 240024_at    | SEC14L2      | 0.51 |
| 220011_at    | AUNIP        | 0.51 |
| 208399_s_at  | EDN3         | 0.51 |
| 203184_at    | FBN2         | 0.51 |
| 1569852_at   | C7orf53      | 0.51 |
| 204105_s_at  | NRCAM        | 0.51 |
| 203021_at    | SLPI         | 0.51 |
| 206306_at    | RYR3         | 0.51 |
| 211782_at    | IDS          | 0.51 |
| 232067_at    | FAXC         | 0.50 |
| 216665_s_at  | TTY2         | 0.50 |
| 210236_at    | PPFIA1       | 0.50 |
| 222774_s_at  | NETO2        | 0.50 |
| 223720_at    | SPINK7       | 0.49 |
| 239136_at    | LOC728978    | 0.49 |
| 206994_at    | CST4         | 0.49 |
| 219250_s_at  | FLRT3        | 0.49 |
| 1553539_at   | KRT74        | 0.49 |
| 224762_at    | SERINC2      | 0.49 |
| 210221_at    | CHRNA3       | 0.49 |
| 220289_s_at  | AIM1L        | 0.49 |
| 218834_s_at  | TMEM132A     | 0.49 |
| 227482_at    | ADCK1        | 0.49 |
| 222277_at    | C1QTNF9B-AS1 | 0.48 |
| 200790_at    | ODC1         | 0.48 |
| 224293_at    | TTY10        | 0.48 |
| 226698_at    | FCHSD1       | 0.48 |
| 232682_at    | MREG         | 0.48 |
| 214168_s_at  | TJP1         | 0.48 |
| 226899_at    | UNC5B        | 0.48 |
| 204351_at    | S100P        | 0.47 |
| 209591_s_at  | BMP7         | 0.47 |
| 226473_at    | CBX2         | 0.47 |
| 236651_at    | KALRN        | 0.47 |



|              |           |      |
|--------------|-----------|------|
| 208701_at    | APLP2     | 0.47 |
| 237466_s_at  | HHIP      | 0.47 |
| 214357_at    | C1orf105  | 0.47 |
| 228977_at    | LOC729680 | 0.47 |
| 1552960_at   | LRRC15    | 0.47 |
| 223991_s_at  | GALNT2    | 0.47 |
| 205534_at    | PCDH7     | 0.47 |
| 231867_at    | ODZ2      | 0.47 |
| 1557321_a_at | CAPN14    | 0.46 |
| 208613_s_at  | FLNB      | 0.46 |
| 218980_at    | FHOD3     | 0.46 |
| 203304_at    | BAMBI     | 0.46 |
| 207703_at    | NLGN4Y    | 0.46 |
| 206196_s_at  | RUNDC3A   | 0.46 |
| 215253_s_at  | RCAN1     | 0.46 |
| 205376_at    | INPP4B    | 0.46 |
| 214636_at    | CALCB     | 0.46 |
| 213913_s_at  | TBC1D30   | 0.46 |
| 233586_s_at  | KLK12     | 0.46 |
| 213556_at    | PINLYP    | 0.45 |
| 207213_s_at  | USP2      | 0.45 |
| 227450_at    | ERP27     | 0.45 |
| 203921_at    | CHST2     | 0.45 |
| 208250_s_at  | DMBT1     | 0.45 |
| 224412_s_at  | TRPM6     | 0.45 |
| 206774_at    | FRMPD1    | 0.45 |
| 214313_s_at  | EIF5B     | 0.44 |
| 227650_at    | HSPA14    | 0.44 |
| 1562247_at   | LOC286058 | 0.44 |
| 202208_s_at  | ARL4C     | 0.44 |
| 217276_x_at  | SERHL2    | 0.44 |
| 1553494_at   | TDH       | 0.44 |
| 213774_s_at  | PPP1R2    | 0.44 |
| 220624_s_at  | ELF5      | 0.43 |
| 239913_at    | SLC10A4   | 0.43 |
| 207147_at    | DLX2      | 0.43 |
| 219946_x_at  | MYH14     | 0.43 |
| 244760_at    | HERC6     | 0.43 |
| 236255_at    | PLEKHG4B  | 0.43 |
| 219463_at    | LAMP5     | 0.43 |
| 239202_at    | RAB3B     | 0.43 |
| 242138_at    | DLX1      | 0.43 |
| 204903_x_at  | ATG4B     | 0.43 |

|              |            |      |
|--------------|------------|------|
| 206882_at    | SLC1A6     | 0.43 |
| 209343_at    | EFHD1      | 0.43 |
| 229252_at    | ATG9B      | 0.43 |
| 221416_at    | PLA2G2F    | 0.42 |
| 227736_at    | C10orf99   | 0.42 |
| 1553829_at   | CYP1B1-AS1 | 0.42 |
| 224279_s_at  | CABYR      | 0.42 |
| 215785_s_at  | CYFIP2     | 0.42 |
| 221627_at    | TRIM10     | 0.42 |
| 205290_s_at  | BMP2       | 0.42 |
| 223739_at    | PADI1      | 0.42 |
| 203130_s_at  | KIF5C      | 0.42 |
| 232555_at    | CREB5      | 0.42 |
| 220067_at    | SPTBN5     | 0.41 |
| 210311_at    | FGF5       | 0.41 |
| 1558687_a_at | FOXN1      | 0.41 |
| 231875_at    | KIF21A     | 0.40 |
| 220129_at    | SOHLH2     | 0.40 |
| 209800_at    | KRT16      | 0.40 |
| 1552807_a_at | SIGLEC10   | 0.40 |
| 210335_at    | RASSF9     | 0.40 |
| 213713_s_at  | GLB1L2     | 0.40 |
| 1556533_at   | C17orf52   | 0.39 |
| 242329_at    | LOC401317  | 0.39 |
| 209859_at    | TRIM9      | 0.39 |
| 229730_at    | SMTNL2     | 0.39 |
| 239572_at    | GJA3       | 0.39 |
| 241985_at    | JMY        | 0.38 |
| 215711_s_at  | WEE1       | 0.38 |
| 206604_at    | OVOL1      | 0.38 |
| 214226_at    | PRSS53     | 0.37 |
| 205724_at    | PKP1       | 0.37 |
| 225809_at    | PARM1      | 0.36 |
| 227764_at    | LYPD6      | 0.36 |
| 218935_at    | EHD3       | 0.36 |
| 219659_at    | ATP8A2     | 0.36 |
| 231778_at    | DLX3       | 0.36 |
| 202376_at    | SERPINA3   | 0.36 |
| 222015_at    | CSNK1E     | 0.36 |
| 220984_s_at  | SLCO5A1    | 0.35 |
| 224262_at    | IL1F10     | 0.35 |
| 206375_s_at  | HSPB3      | 0.35 |
| 237225_at    | ZFY-AS1    | 0.35 |

|              |            |      |
|--------------|------------|------|
| 226872_at    | RFX2       | 0.35 |
| 202752_x_at  | SLC7A8     | 0.35 |
| 210948_s_at  | LEF1       | 0.35 |
| 208216_at    | DLX4       | 0.34 |
| 229823_at    | RIMS2      | 0.34 |
| 214983_at    | TTY15      | 0.34 |
| 237003_at    | BEST3      | 0.34 |
| 205637_s_at  | SH3GL3     | 0.34 |
| 1555019_at   | CDHR1      | 0.34 |
| 205555_s_at  | MSX2       | 0.33 |
| 228975_at    | SP6        | 0.33 |
| 214576_at    | KRT36      | 0.33 |
| 204720_s_at  | DNAJC6     | 0.33 |
| 217031_at    | KRT84      | 0.32 |
| 218266_s_at  | NCS1       | 0.32 |
| 219612_s_at  | FGG        | 0.31 |
| 219301_s_at  | CNTNAP2    | 0.31 |
| 233301_at    | OXCT2      | 0.31 |
| 211429_s_at  | SERPINA1   | 0.31 |
| 219832_s_at  | HOXC13     | 0.31 |
| 232684_at    | ZNF503-AS1 | 0.30 |
| 222878_s_at  | OTUB2      | 0.30 |
| 220090_at    | CRNN       | 0.30 |
| 206279_at    | PRKY       | 0.30 |
| 222351_at    | PPP2R1B    | 0.30 |
| 206423_at    | ANGPTL7    | 0.29 |
| 209981_at    | CSDC2      | 0.29 |
| 205374_at    | SLN        | 0.28 |
| 243445_at    | BNC2       | 0.28 |
| 206004_at    | TGM3       | 0.27 |
| 240967_at    | KRTAP19-3  | 0.26 |
| 229158_at    | WNK4       | 0.26 |
| 207065_at    | KRT75      | 0.26 |
| 220635_at    | PSORS1C2   | 0.26 |
| 228705_at    | CAPN12     | 0.25 |
| 1556410_a_at | KRTAP19-1  | 0.24 |
| 229030_at    | CAPN8      | 0.24 |
| 214517_at    | KRTAP5-9   | 0.24 |
| 209921_at    | SLC7A11    | 0.23 |
| 210082_at    | ABCA4      | 0.23 |
| 206677_at    | KRT31      | 0.23 |
| 230760_at    | ZFY        | 0.23 |
| 230720_at    | RNF182     | 0.22 |

|              |           |      |
|--------------|-----------|------|
| 1564435_a_at | KRT72     | 0.22 |
| 237507_at    | KRT73     | 0.21 |
| 208092_s_at  | FAM49A    | 0.21 |
| 234683_at    | KRTAP4-6  | 0.21 |
| 234635_at    | KRTAP4-1  | 0.21 |
| 233640_x_at  | KRTAP9-4  | 0.20 |
| 205713_s_at  | COMP      | 0.20 |
| 233681_at    | KRTAP3-3  | 0.20 |
| 216810_at    | KRTAP4-7  | 0.19 |
| 234639_x_at  | KRTAP9-8  | 0.19 |
| 234631_at    | KRTAP4-8  | 0.19 |
| 206969_at    | KRT34     | 0.19 |
| 224269_at    | KRTAP4-12 | 0.18 |
| 208483_x_at  | KRT33A    | 0.18 |
| 211149_at    | UTY       | 0.18 |
| 211029_x_at  | FGF18     | 0.18 |
| 234772_s_at  | KRTAP2-2  | 0.17 |
| 234678_at    | KRTAP4-3  | 0.17 |
| 1564803_at   | KRTAP11-1 | 0.17 |
| 233534_at    | KRTAP3-2  | 0.17 |
| 220976_s_at  | KRTAP1-1  | 0.17 |
| 234684_s_at  | KRTAP4-4  | 0.17 |
| 1554398_at   | LYG2      | 0.17 |
| 206224_at    | CST1      | 0.17 |
| 208532_x_at  | KRTAP5-8  | 0.17 |
| 1561330_at   | DSG4      | 0.16 |
| 207146_at    | KRT32     | 0.16 |
| 242301_at    | CBLN2     | 0.16 |
| 234880_x_at  | KRTAP1-3  | 0.16 |
| 234691_at    | KRTAP2-1  | 0.16 |
| 234679_at    | KRTAP9-3  | 0.16 |
| 234680_at    | KRTAP17-1 | 0.15 |
| 206027_at    | S100A3    | 0.15 |
| 1555775_a_at | ZAR1      | 0.15 |
| 234633_at    | KRTAP4-11 | 0.15 |
| 234637_at    | KRTAP4-5  | 0.14 |
| 220779_at    | PADI3     | 0.14 |
| 1555673_at   | KRTAP2-3  | 0.14 |
| 220972_s_at  | KRTAP9-9  | 0.14 |
| 234671_at    | KRTAP4-2  | 0.13 |
| 232887_at    | PIRT      | 0.13 |
| 207670_at    | KRT85     | 0.13 |
| 233537_at    | KRTAP3-1  | 0.13 |

|              |            |      |
|--------------|------------|------|
| 221297_at    | GPRC5D     | 0.12 |
| 233158_at    | KRT82      | 0.12 |
| 237853_x_at  | KRTAP10-12 | 0.12 |
| 219270_at    | CHAC1      | 0.12 |
| 1562629_a_at | KRT40      | 0.11 |
| 207787_at    | KRT33B     | 0.11 |
| 228492_at    | USP9Y      | 0.11 |
| 1564960_at   | KRTAP7-1   | 0.11 |
| 207457_s_at  | LY6G6D     | 0.11 |
| 213711_at    | KRT81      | 0.10 |
| 216921_s_at  | KRT35      | 0.10 |
| 1560897_a_at | KRTAP10-11 | 0.10 |
| 1564974_at   | KRTAP8-1   | 0.09 |
| 207669_at    | KRT83      | 0.09 |
| 207063_at    | NCRNA00185 | 0.08 |
| 232618_at    | TXLNG2P    | 0.07 |
| 205000_at    | DDX3Y      | 0.05 |
| 206700_s_at  | KDM5D      | 0.04 |
| 201909_at    | RPS4Y1     | 0.04 |
| 204409_s_at  | EIF1AY     | 0.04 |
| 208331_at    | BPY2       | 0.03 |

Supplementary Table 4. RT-PCR Primers for mouse mRNA validation studies.

| Mouse RT-PCR |                        |                           |
|--------------|------------------------|---------------------------|
| Gene         | Forward Primer         | Reverse Primer            |
| Cd8a         | GAGACCAGAAGATTGTCGGC   | GCCTGGGACATTTGCAAACA      |
| Cd3d         | ACTGTGTGGAGCTAGACTCG   | CTGTAAGTGGGTATCTTCACG     |
| Stat1        | CGCAACTACAAAGTCATGGC   | ATCCAGTTCGCTTAGGGTCCG     |
| Ifng         | ACGGCACAGTCATTGAAAGC   | GCTGATGGCCTGATTGTCTT      |
| Tap1         | CCTGCTTATCTTGGATGATGC  | GGTAGCACCCCTCCTCTCTT      |
| Cxcl9        | ACGGAGATCAAACCTGCCTA   | TTCCCCCTCTTTTGCTTTTT      |
| Cxcl10       | ATCCACCGCTGAGAGACATC   | CCTTGAGTCCCACTCAGACC      |
| Cxcl11       | TAGCCCTGGCTGCAATATCT   | ACTTTGTCGCAGCCGTTACT      |
| Irf7         | GCACCCTCCTTTTCACTGAG   | GCCAAGGTGGCTGTAGATGT      |
| Ccl5         | CCCTCACCATCATCCTCACT   | GAGCACTTGCTGCTGGTGTA      |
| H60          | GGTCTGAGTGTCACCTGGATTG | TTTTCTTCAGCATAACCAAGCGA   |
| Rae-1        | TGGCCAAGGCAGCAGTG      | CGTTGGTGTATCCATAGCTCAGTAG |
| GAPDH        | GAAGGTCGGTGTGAACGGA    | GTTAGTGGGGTCTCGCTCCT      |

**Supplementary Table 5. RT-PCR Primers for human mRNA validation studies.**

| <b>Human RT-PCR</b> |                                |                              |
|---------------------|--------------------------------|------------------------------|
| <b>Gene</b>         | <b>Forward Primer</b>          | <b>Reverse Primer</b>        |
| <b>GZMA</b>         | <b>AGATTTCTGGCATCCTCTC</b>     | <b>GACCATGTAGGGTCTTGA</b>    |
| <b>IL15</b>         | <b>TTTCAGTGCAGGGCTTCCT</b>     | <b>GGGTGAACATCACTTTCCC</b>   |
| <b>STAT1</b>        | <b>GCAGGTTCAACCAGCTTTAT</b>    | <b>TGAAGATTACGCTTGCTTT</b>   |
| <b>CXCL9</b>        | <b>GTAGTGAGAAAGGGTCGC</b>      | <b>AGGGCTTGGGGCAAATTG</b>    |
| <b>IFNG</b>         | <b>TCGGTAACTGACTTGAATGTCCA</b> | <b>TCGCTTCCCTGTTTTAGCTGC</b> |

## Supplementary References

- 30 Olsen, E. A. *et al.* Alopecia areata investigational assessment guidelines--Part II. National Alopecia Areata Foundation. *J Am Acad Dermatol* **51**, 440-447, doi:10.1016/j.jaad.2003.09.032 (2004).
- 31 Andrews, S. <<http://www.bioinformatics.babraham.ac.uk/projects/fastqc/>>
- 32 Trapnell, C., Pachter, L. & Salzberg, S. L. TopHat: discovering splice junctions with RNA-Seq. *Bioinformatics* **25**, 1105-1111, doi:10.1093/bioinformatics/btp120 (2009).
- 33 Robinson, M. D., McCarthy, D. J. & Smyth, G. K. edgeR: a Bioconductor package for differential expression analysis of digital gene expression data. *Bioinformatics* **26**, 139-140, doi:10.1093/bioinformatics/btp616 (2010).
- 34 Irizarry, R. A. *et al.* Summaries of Affymetrix GeneChip probe level data. *Nucleic acids research* **31**, e15 (2003).
- 35 Smyth, G. K. *Limma: linear models for microarray data*. In: "*Bioinformatics and Computational biology Solutions using R and Bioconductor*". 397-420 (Springer, New York, 2005).
- 36 Eisen, M. B., Spellman, P. T., Brown, P. O. & Botstein, D. Cluster analysis and display of genome-wide expression patterns. *Proceedings of the National Academy of Sciences of the United States of America* **95**, 14863-14868 (1998).
- 37 Saldanha, A. J. Java Treeview--extensible visualization of microarray data. *Bioinformatics* **20**, 3246-3248, doi:10.1093/bioinformatics/bth349 (2004).
- 38 Eichler, G. S., Huang, S. & Ingber, D. E. Gene Expression Dynamics Inspector (GEDI): for integrative analysis of expression profiles. *Bioinformatics* **19**, 2321-2322 (2003).
- 39 Kirou, K. A. *et al.* Coordinate overexpression of interferon-alpha-induced genes in systemic lupus erythematosus. *Arthritis Rheum* **50**, 3958-3967, doi:10.1002/art.20798 (2004).
- 40 Feng, X. *et al.* Association of increased interferon-inducible gene expression with disease activity and lupus nephritis in patients with systemic lupus erythematosus. *Arthritis and rheumatism* **54**, 2951-2962, doi:10.1002/art.22044 (2006).
- 41 Best, J. A. *et al.* Transcriptional insights into the CD8(+) T cell response to infection and memory T cell formation. *Nature immunology* **14**, 404-412, doi:10.1038/ni.2536 (2013).
- 42 Bezman, N. A. *et al.* Molecular definition of the identity and activation of natural killer cells. *Nature immunology* **13**, 1000-1009, doi:10.1038/ni.2395 (2012).
